# Supplementary material for: Brjóstagjöf og áhrif hennar á lífslíkur ungbarna á Íslandi 1910-1925
Source: Royal Society of Chemistry journal article supplement (doi:10.1039/d3dt03149g), 2005-06-01
Supplement: d3dt03149g1.pdf [file d3dt03149g1.pdf]

## Supporting Information

### **Role of Ancillary Ligands in Selectivity Towards Acceptorless Dehydrogenation versus Dehydrogenative Coupling of Alcohols and Amines Catalyzed by Cationic Ruthenium(II)-CNC Pincer Complexes**

Rahul Kumar Singh,<sup>†,a</sup> Dibya Yadav,<sup>†,a</sup> Shilpi Misra<sup>a,b</sup> and Amrendra K. Singh<sup>\*,a</sup>

<sup>a</sup>Department of Chemistry, Indian Institute of Technology Indore, Indore 453552, India

<sup>b</sup>Centre for Scientific and Applied Research, IPS Academy, Indore 452012, India

<sup>†</sup>Equal Contribution. \*Corresponding Author, Email: aks@iiti.ac.in

## Table of Contents

| S. No. | Contents                                                                                                                          | Page No. |
|--------|-----------------------------------------------------------------------------------------------------------------------------------|----------|
| 1.     | General Information                                                                                                               | S3       |
| 2.     | Crystallographic parameters, selected bond lengths, and bond angles of complexes <b>4b</b> and <b>6b</b>                          | S4-S5    |
| 3.     | $^1\text{H}$ NMR spectra of <b>CNC<sup>iPr</sup>·2HBr</b> and <b>CNC<sup>Cy</sup>·2HCl</b>                                        | S6       |
| 4.     | $^1\text{H}$ , $^{31}\text{P}$ , $^{13}\text{C}$ NMR, IR spectrum, & HRMS data of complexes <b>1b</b> , <b>1c</b> , and <b>2c</b> | S7-S15   |
| 5.     | $^1\text{H}$ , $^{31}\text{P}$ , $^{13}\text{C}$ NMR and HRMS data of complexes <b>3b</b> , and <b>3c</b>                         | S16-S22  |
| 6.     | $^1\text{H}$ , $^{31}\text{P}$ , $^{13}\text{C}$ NMR and HRMS data of complexes <b>4b</b> , and <b>4c</b>                         | S23-S28  |
| 7.     | $^1\text{H}$ , $^{31}\text{P}$ , $^{13}\text{C}$ NMR and HRMS data of complexes <b>6b</b> , and <b>6c</b>                         | S29-S34  |
| 8.     | HRMS data of complex <b>5b</b>                                                                                                    | S35      |
| 9.     | Plausible mechanism for transfer hydrogenation reaction                                                                           | S36      |
| 10.    | $^1\text{H}$ NMR of the catalytic reaction mixture                                                                                | S37      |
| 11.    | Mass data of catalytic reaction mixture                                                                                           | S38      |
| 12.    | Mass data of catalytic reaction mixture of benzaldehyde with catalyst <b>4b</b>                                                   | S39      |
| 13.    | Plausible mechanism for the formation of other intermediates in catalytic reaction                                                | S40      |
| 14.    | Determination of % GC yield by gas chromatography                                                                                 | S41      |
| 15.    | GC-MS spectra for entries <b>5-13</b> of table <b>1</b>                                                                           | S42-S46  |
| 16.    | GC-MS spectra for entries <b>6-14</b> of table <b>2</b>                                                                           | S46-S50  |
| 17.    | GC-MS spectra for entries <b>1-15</b> of table <b>3</b>                                                                           | S51-S61  |
| 18.    | GC-MS spectra for entries <b>1-17</b> of table <b>4</b> and <b>1-5</b> of table <b>5</b>                                          | S62-S74  |
| 19.    | $^1\text{H}$ and $^{13}\text{C}$ NMR spectra of cyclohexanol and benzaldehyde                                                     | S75-S76  |
| 20.    | DFT optimized structures of <b>[Ru-H]<sup>+</sup></b>                                                                             | S77      |
| 21.    | Cartesian coordinates of DFT optimized structures                                                                                 | S78-S91  |
| 22.    | References                                                                                                                        | S92      |

## General Information

**Catalysis experiments:** Since TH and AAD reactions have been studied with the *N*-Me analogs,<sup>1-3</sup> no substrate scope was investigated again with the new compounds but only a confirmation of the observed trends in terms of the trans effect of ancillary ligands was checked. The catalyst loading may seem high; however, the focus of this manuscript is the effect of ancillary ligands on catalytic performance with a comparison of the four ligands (CO, COD, PPh<sub>3</sub>, DMSO) and the unexpected reversal in catalytic activity during the ADC reactions. The CNC pincer ligand platform provides a unique ligand framework with no metal-ligand cooperativity, which allows this comparison between a set of ancillary ligands. New complexes with two bulkier *N*-substituents have allowed us to observe the effect of ancillary ligands and confirmation of these effects in a larger set of compounds as well as characterization of an important Ru-H intermediate with CO ligand positioned trans to the product.

**Table S1.** Crystal data and structure refinement parameters for **4b** and **6b**.

|                                                   | <b>4b</b>                                                                                                               | <b>6b</b>                                                                                      |
|---------------------------------------------------|-------------------------------------------------------------------------------------------------------------------------|------------------------------------------------------------------------------------------------|
| <b>Empirical formula</b>                          | C <sub>53</sub> H <sub>55</sub> Br <sub>0.17</sub> Cl <sub>0.85</sub> N <sub>5</sub> O <sub>1.5</sub> P <sub>2</sub> Ru | C <sub>21</sub> H <sub>39</sub> Cl <sub>2</sub> N <sub>5</sub> O <sub>5</sub> RuS <sub>2</sub> |
| <b>T/K</b>                                        | 293(2)                                                                                                                  | 293(2)                                                                                         |
| <b>Crystal System</b>                             | Monoclinic                                                                                                              | Monoclinic                                                                                     |
| <b>Space Group</b>                                | <i>P</i> 2 <sub>1</sub> / <i>n</i>                                                                                      | <i>P</i> 2 <sub>1</sub> / <i>n</i>                                                             |
| <b>a/Å</b>                                        | 12.3216(2)                                                                                                              | 11.3804(2)                                                                                     |
| <b>b/Å</b>                                        | 26.5103(11)                                                                                                             | 11.0157(2)                                                                                     |
| <b>c/Å</b>                                        | 14.8679(3)                                                                                                              | 24.3528(4)                                                                                     |
| <b>α/°</b>                                        | 90                                                                                                                      | 90                                                                                             |
| <b>β/°</b>                                        | 92.768(2)                                                                                                               | 96.679(2)                                                                                      |
| <b>γ/°</b>                                        | 90                                                                                                                      | 90                                                                                             |
| <b>V/Å<sup>3</sup></b>                            | 4850.9(2)                                                                                                               | 3032.22(9)                                                                                     |
| <b>Z</b>                                          | 4                                                                                                                       | 4                                                                                              |
| <b>ρ<sub>calc</sub>/cm<sup>3</sup></b>            | 1.360                                                                                                                   | 1.484                                                                                          |
| <b>λ/Å (Cu-Kα)</b>                                | 1.54184                                                                                                                 | 1.54184                                                                                        |
| <b>Reflections Collected</b>                      | 21244                                                                                                                   | 13368                                                                                          |
| <b>Data/restr./param.</b>                         | 8823/0/578                                                                                                              | 5531/0/342                                                                                     |
| <b>R (int)</b>                                    | 0.0843                                                                                                                  | 0.0897                                                                                         |
| <b>Final R indices [<i>I</i>&gt;2σ(<i>I</i>)]</b> | R1 = 0.0719, wR2 = 0.1823                                                                                               | R1 = 0.0866, wR2 = 0.2388                                                                      |
| <b>R indices (all data)</b>                       | R1 = 0.0918, wR2 = 0.2003                                                                                               | R1 = 0.0909, wR2 = 0.2488                                                                      |
| <b>GOF on F<sup>2</sup></b>                       | 1.058                                                                                                                   | 1.039                                                                                          |

**Table S2.** Selected bond lengths and bond angles of complex **4b** and **6b**.

| <b>Complex</b> | <b>Bond lengths (Å)</b> | <b>Bond angles (°)</b>  |
|----------------|-------------------------|-------------------------|
| <b>4b</b>      | Ru1-N1, 2.058(4)        | P2-Ru1-P1, 165.04(5)    |
|                | Ru1-C1, 2.022(5)        | N1-Ru1-P1, 100.75(13)   |
|                | Ru1-C11, 2.049(6)       | N1-Ru1-P2, 94.21(13)    |
|                | Ru1-P1, 2.3462(14)      | C1-Ru1-P1, 91.58(16)    |
|                | Ru1-P2, 2.3303(15)      | C1-Ru1-P2, 91.81(16)    |
|                |                         | C1-Ru1-N1, 77.5(2)      |
|                |                         | C1-Ru1-C11, 154.5(2)    |
|                |                         | C11-Ru1-P1, 94.09(16)   |
|                |                         | C11-Ru1-P2, 89.10(16)   |
|                |                         | C11-Ru1-N1, 77.0(2)     |
|                |                         |                         |
| <b>6b</b>      | Ru1-N1, 1.995(5)        | N1-Ru1-C1, 78.0(2)      |
|                | Ru1-C1, 2.062(6)        | N1-Ru1-C11, 77.7(2)     |
|                | Ru1-C11, 2.061(6)       | N1-Ru1-S1, 89.69(14)    |
|                | Ru1-S1, 2.2954(14)      | N1-Ru1-S2, 89.35(14)    |
|                | Ru1-S2, 2.3138(14)      | N1-Ru1-Cl1, 177.23(14)  |
|                | Ru1-Cl1, 2.4296(13)     | C1-Ru1-S1, 88.29(16)    |
|                |                         | C1-Ru1-S2, 87.69(16)    |
|                |                         | C11-Ru1-Cl1, 101.60(15) |
|                |                         | C11-Ru1-C1, 155.7(2)    |
|                |                         | C11-Ru1-S1, 91.74(15)   |
|                |                         | C11-Ru1-S2, 91.87(15)   |
|                |                         | C1-Ru1-Cl1, 102.67(16)  |
|                |                         | S1-Ru1-Cl1, 87.65(5)    |
|                |                         | S1-Ru1-S2, 175.98(6)    |
|                | S2-Ru1-Cl1, 93.36(5)    |                         |

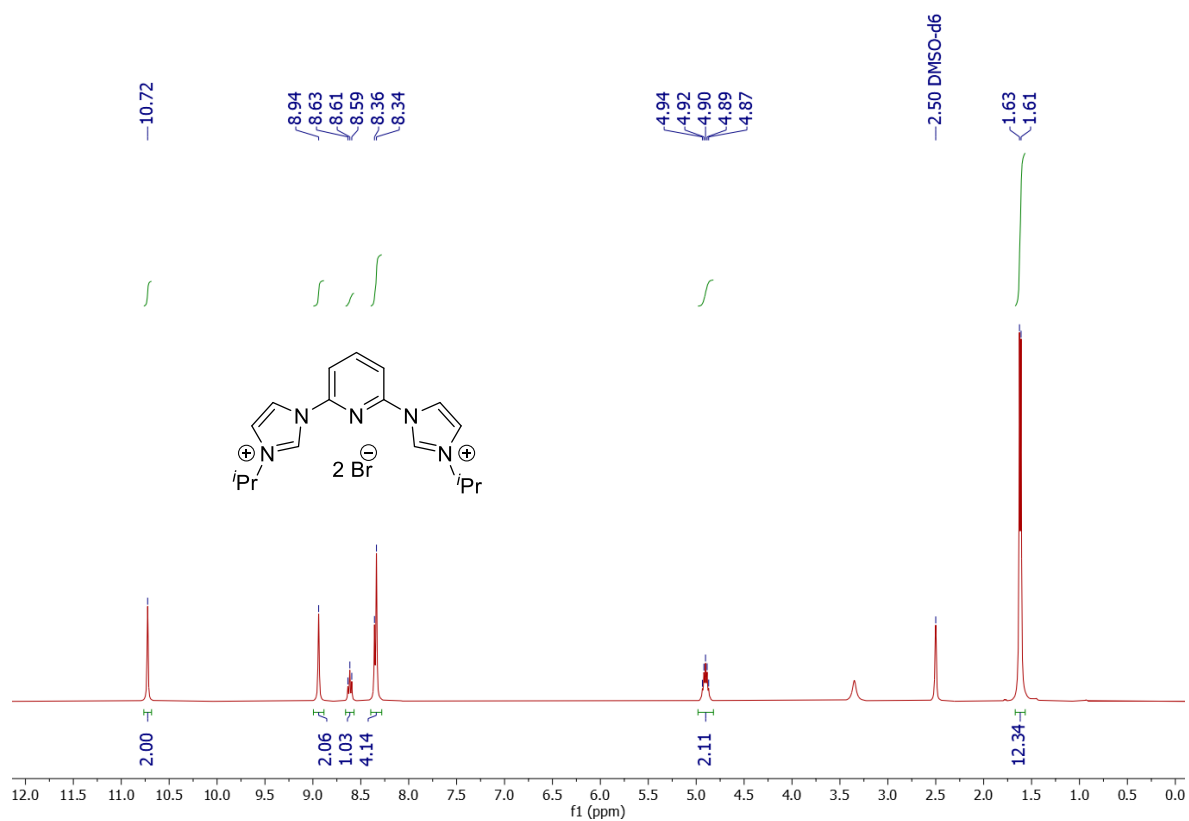

Figure S1. <sup>1</sup>H NMR spectrum of CNC<sup>iPr</sup>·2HBr.

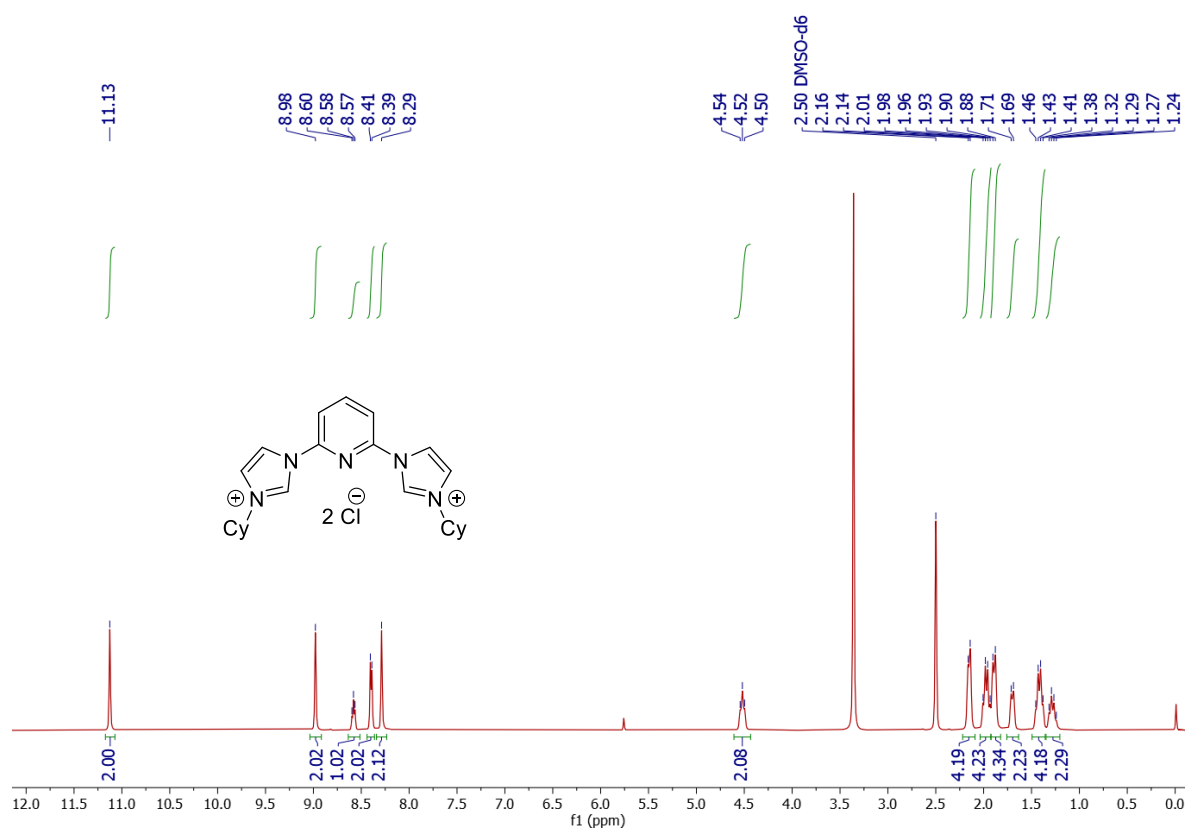

Figure S2. <sup>1</sup>H NMR spectrum of CNC<sup>Cy</sup>·2HCl.

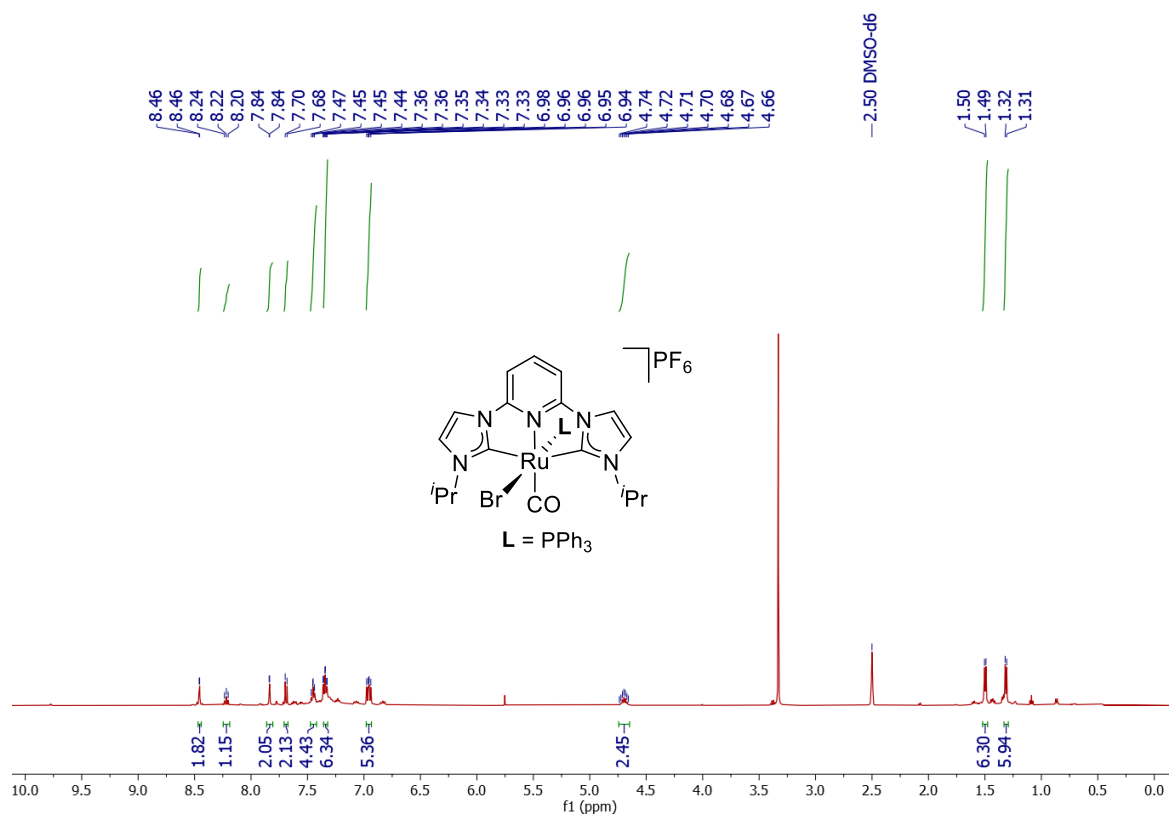

Figure S3.  $^1H$  NMR spectrum of Complex **1b**.

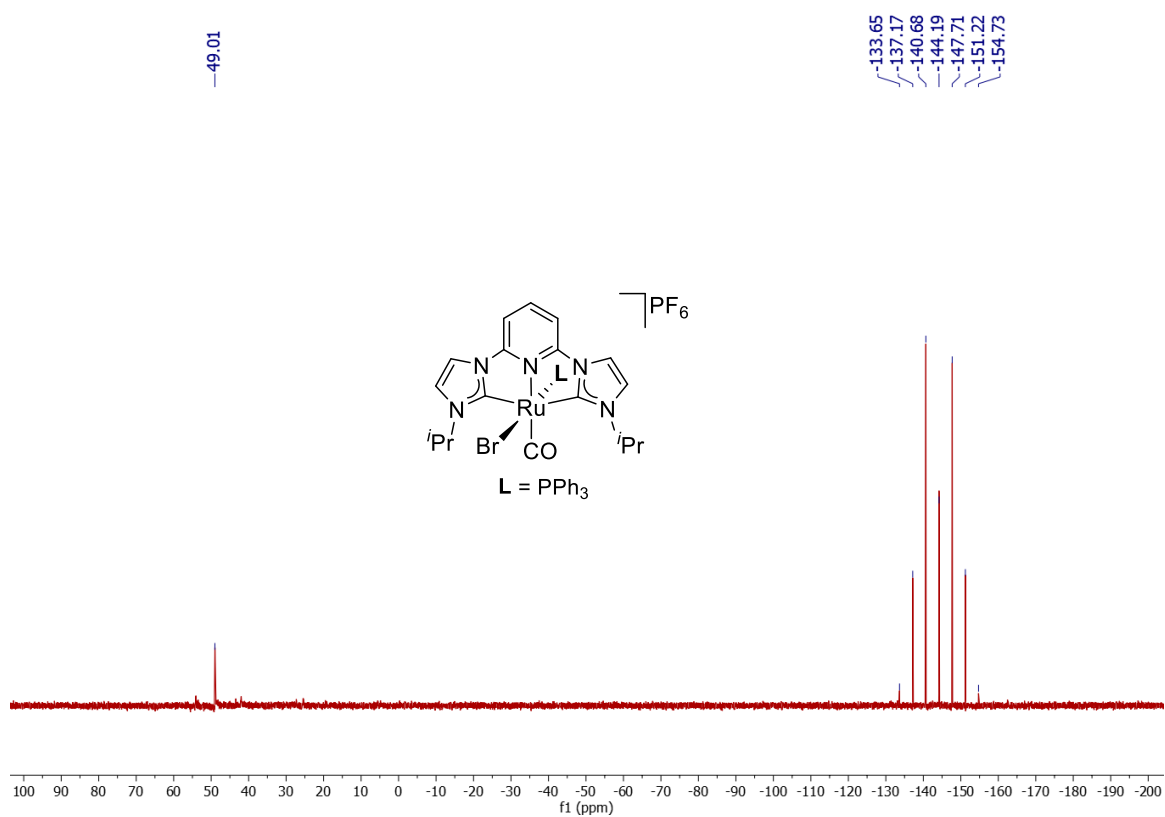

Figure S4.  $^{31}P$  NMR spectrum of Complex **1b**.

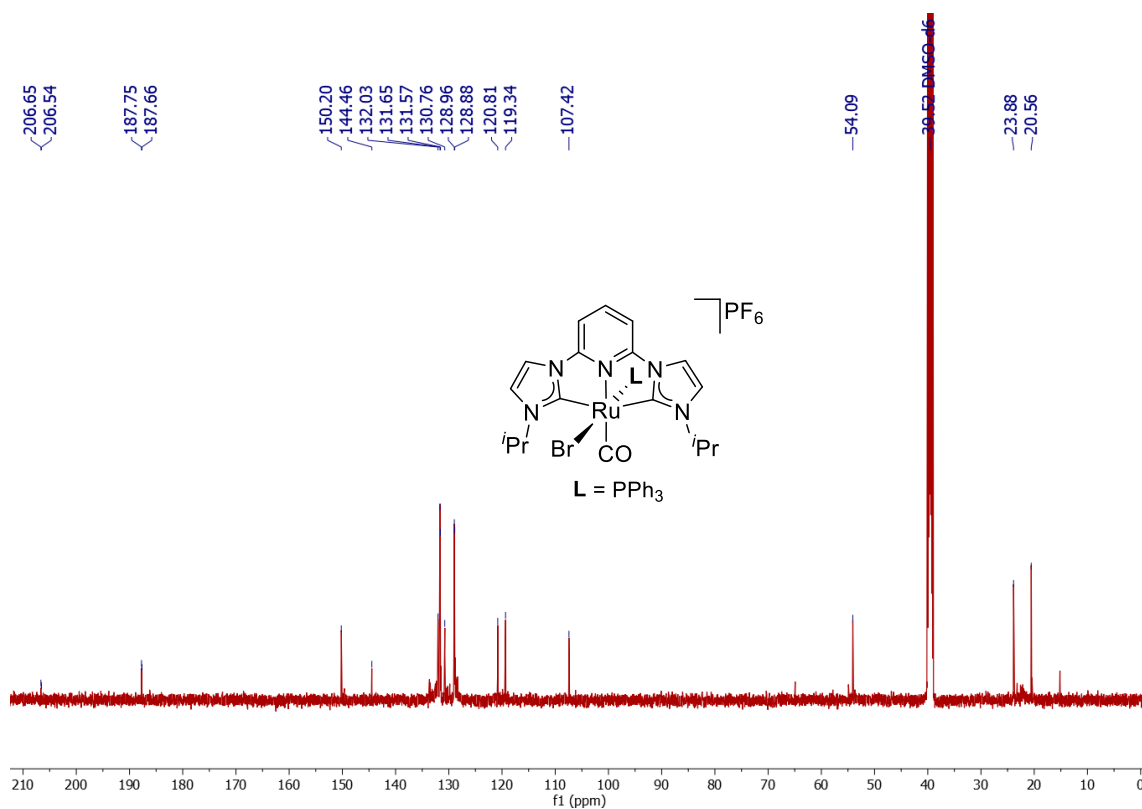

Figure S5. <sup>13</sup>C NMR spectrum of Complex 1b.

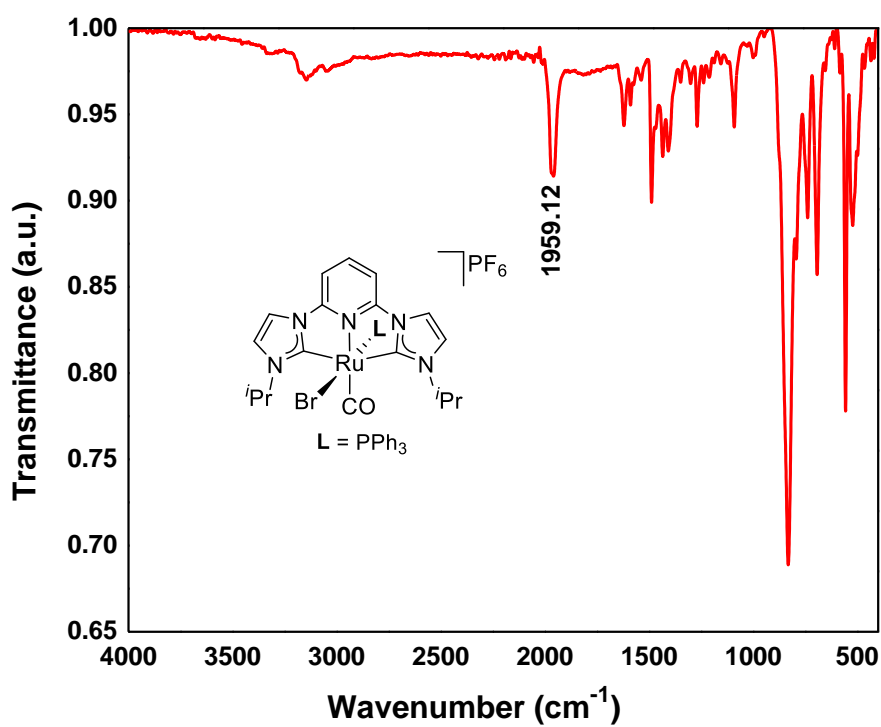

Figure S6. IR spectra of Complex 1b.



# Display Report

## Analysis Info

Analysis Name D:\Data\July 2022\h chem AKS-RKS-200\_RA5\_01\_19810.d  
 Method 2. LCMS tune wide ACN.m  
 Sample Name h chem AKS-RKS-200  
 Comment

Acquisition Date 21-Jul-22 7:50:33 PM

Operator IIT Indore  
 Instrument micrOTOF-Q 228888.10348

## Acquisition Parameter

|             |            |                       |           |                  |           |
|-------------|------------|-----------------------|-----------|------------------|-----------|
| Source Type | ESI        | Ion Polarity          | Positive  | Set Nebulizer    | 2.0 Bar   |
| Focus       | Not active | Set Capillary         | 4500 V    | Set Dry Heater   | 250 °C    |
| Scan Begin  | 50 m/z     | Set End Plate Offset  | -500 V    | Set Dry Gas      | 7.0 l/min |
| Scan End    | 3000 m/z   | Set Collision Cell RF | 650.0 Vpp | Set Divert Valve | Waste     |

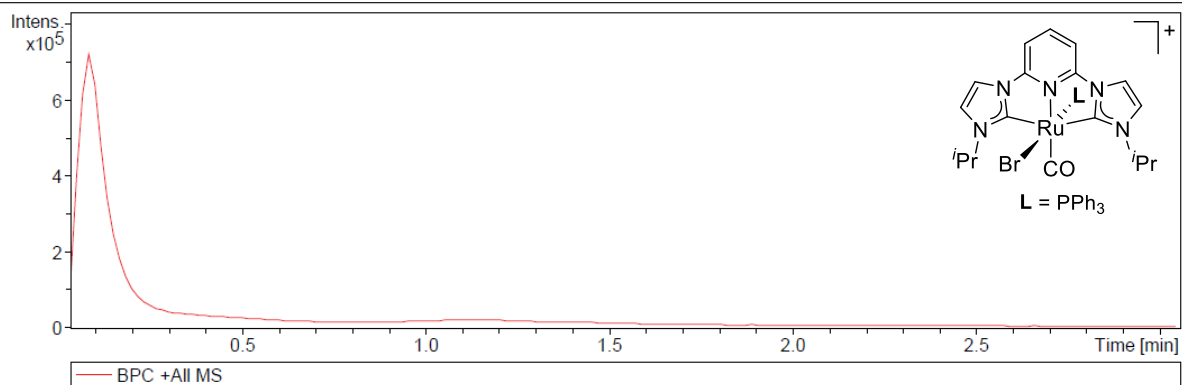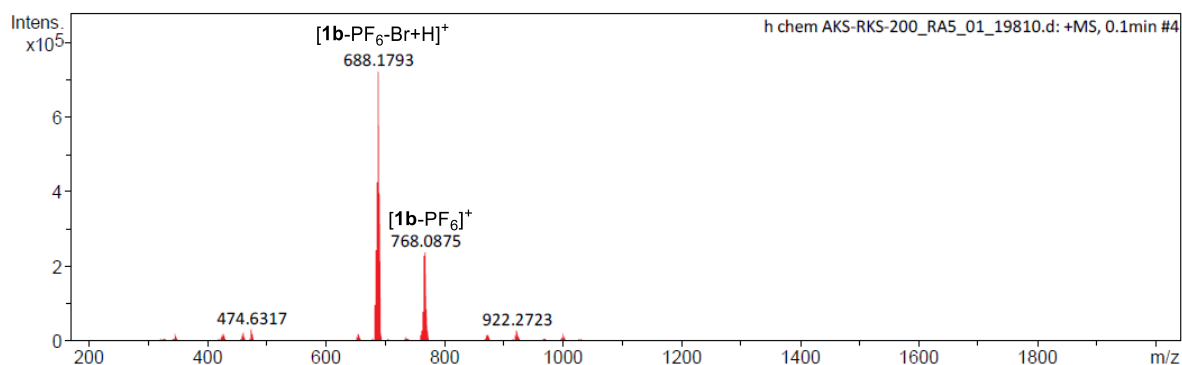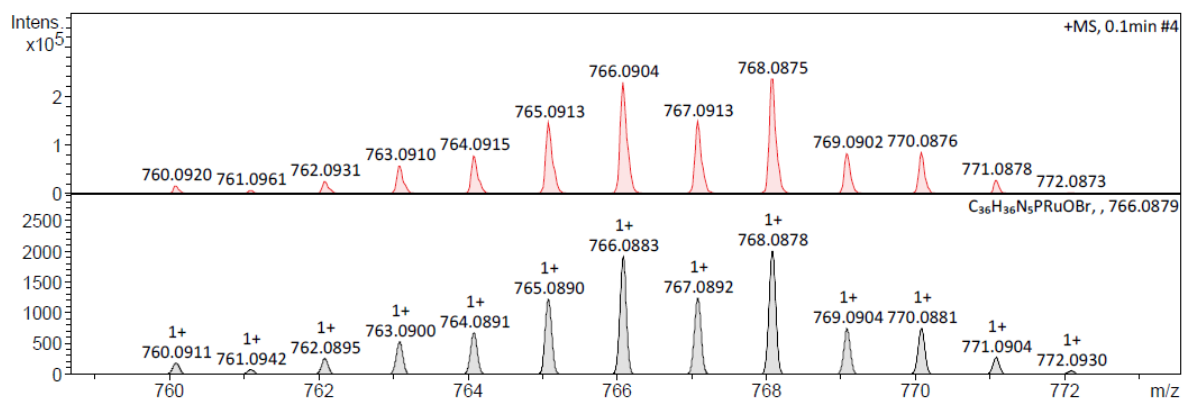

**Figure S7.** HRMS spectrogram of Complex **1b**.

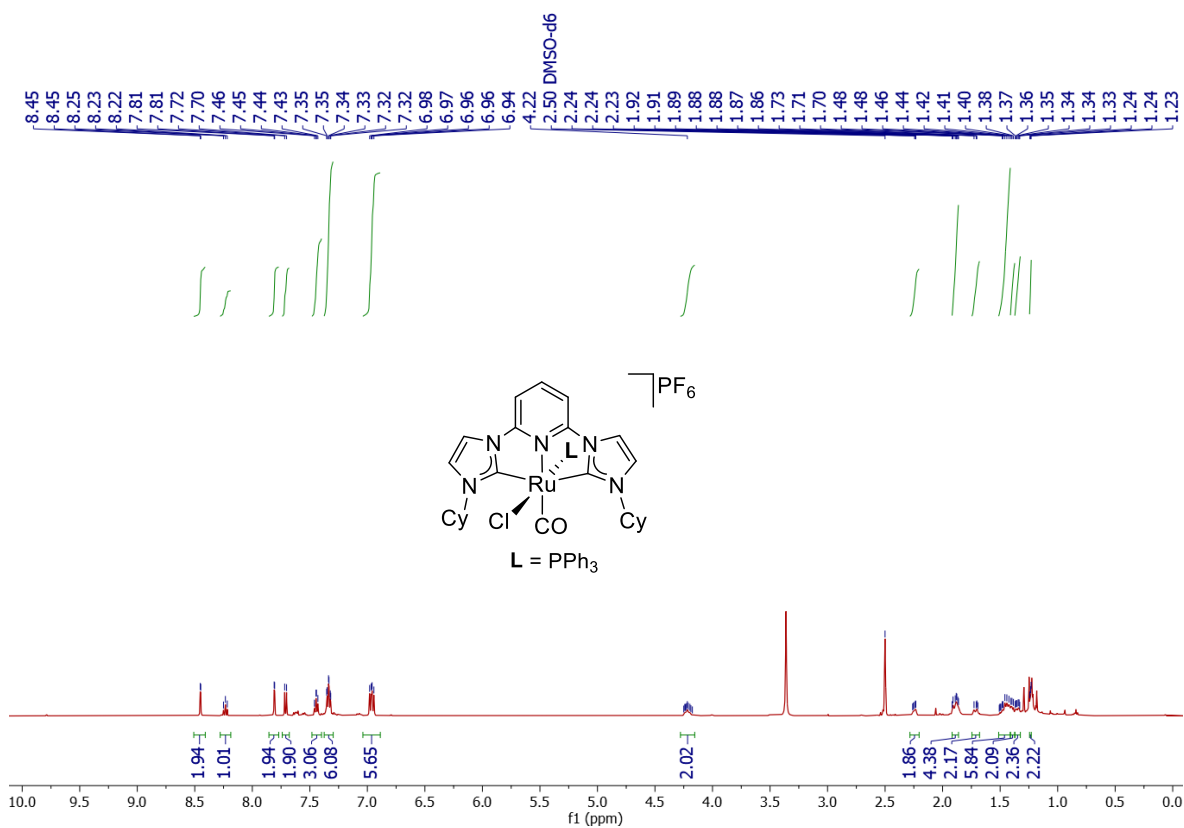

Figure S8.  $^1H$  NMR spectrum of Complex 1c.

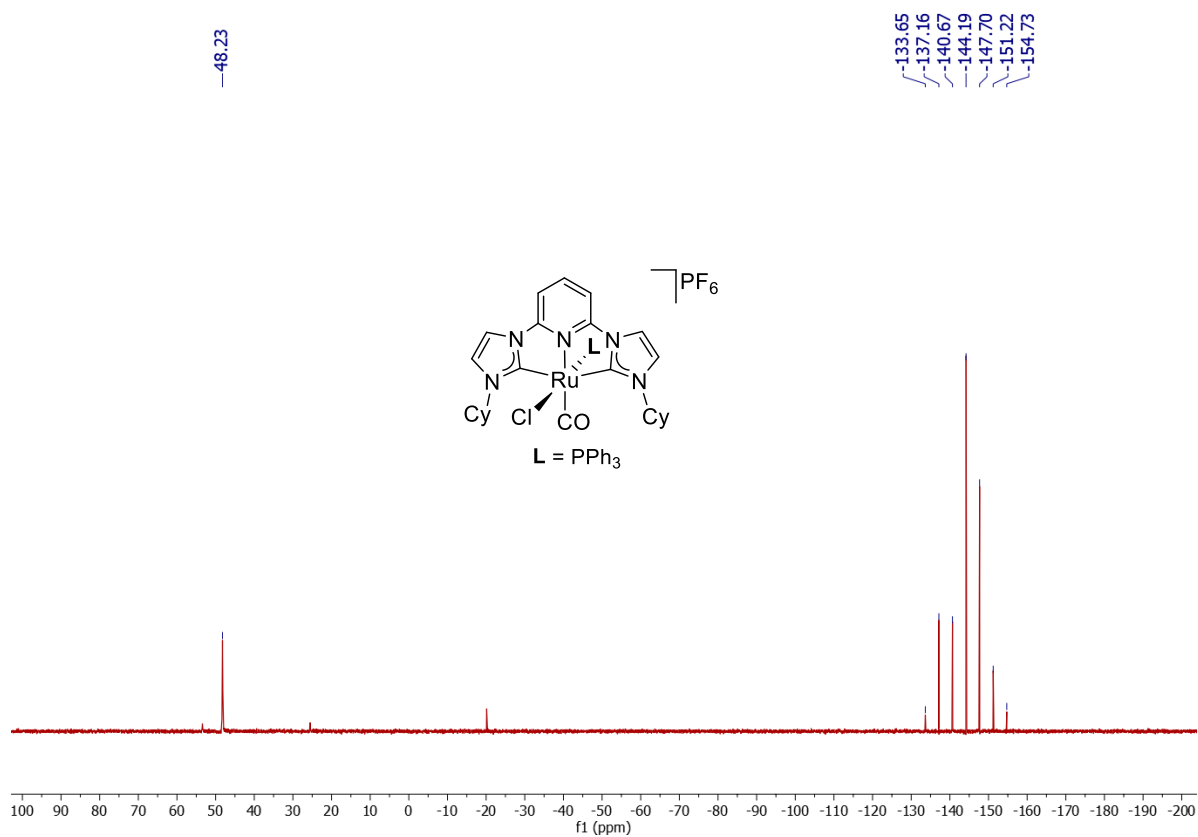

Figure S9.  $^{31}P$  NMR spectrum of Complex 1c.



# Display Report

## Analysis Info

Analysis Name D:\Data\May 2022\h chem AKS-RKS-176B\_RB3\_01\_17631.d  
Method 2. LCMS tune wide ACN.m  
Sample Name h chem AKS-RKS-176B  
Comment

Acquisition Date 18-May-22 9:13:43 PM  
Operator IIT Indore  
Instrument micrOTOF-Q 228888.10348

## Acquisition Parameter

|             |            |                       |           |                  |           |
|-------------|------------|-----------------------|-----------|------------------|-----------|
| Source Type | ESI        | Ion Polarity          | Positive  | Set Nebulizer    | 2.0 Bar   |
| Focus       | Not active | Set Capillary         | 4500 V    | Set Dry Heater   | 250 °C    |
| Scan Begin  | 50 m/z     | Set End Plate Offset  | -500 V    | Set Dry Gas      | 7.0 l/min |
| Scan End    | 3000 m/z   | Set Collision Cell RF | 650.0 Vpp | Set Divert Valve | Waste     |

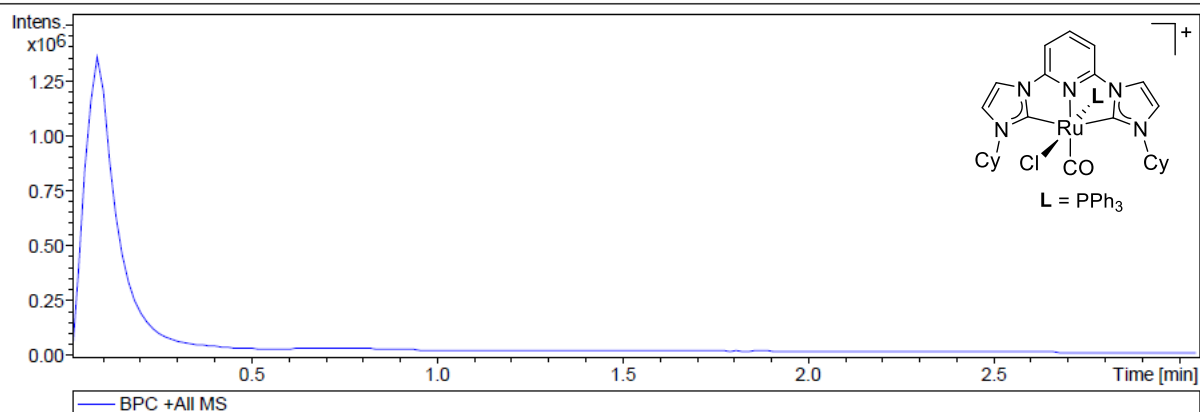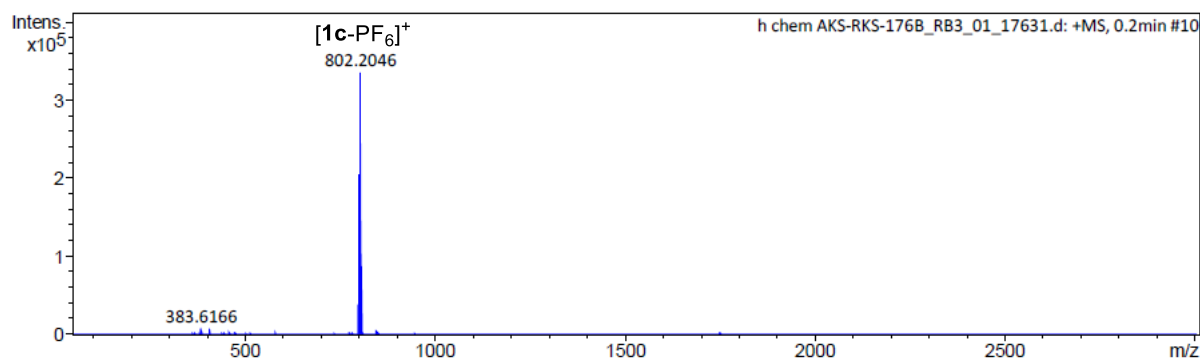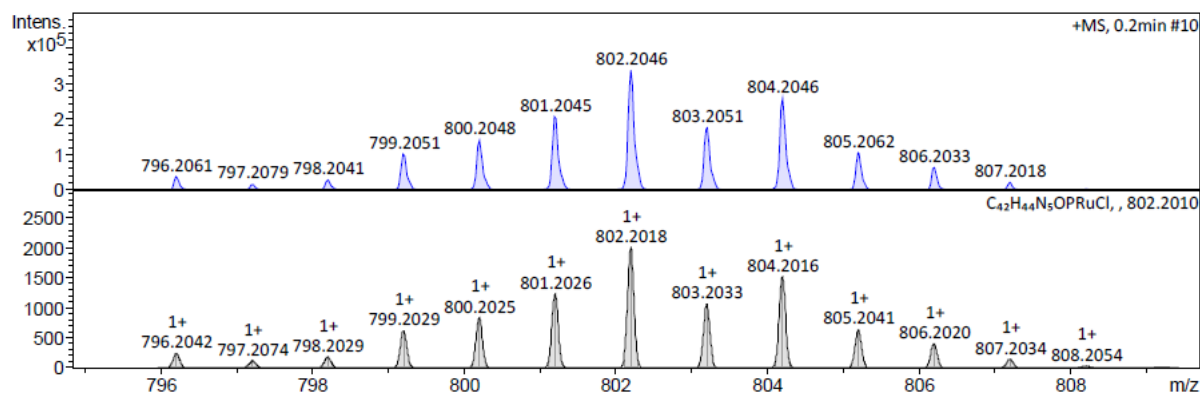

Figure S12. HRMS spectrum of complex **1c**.

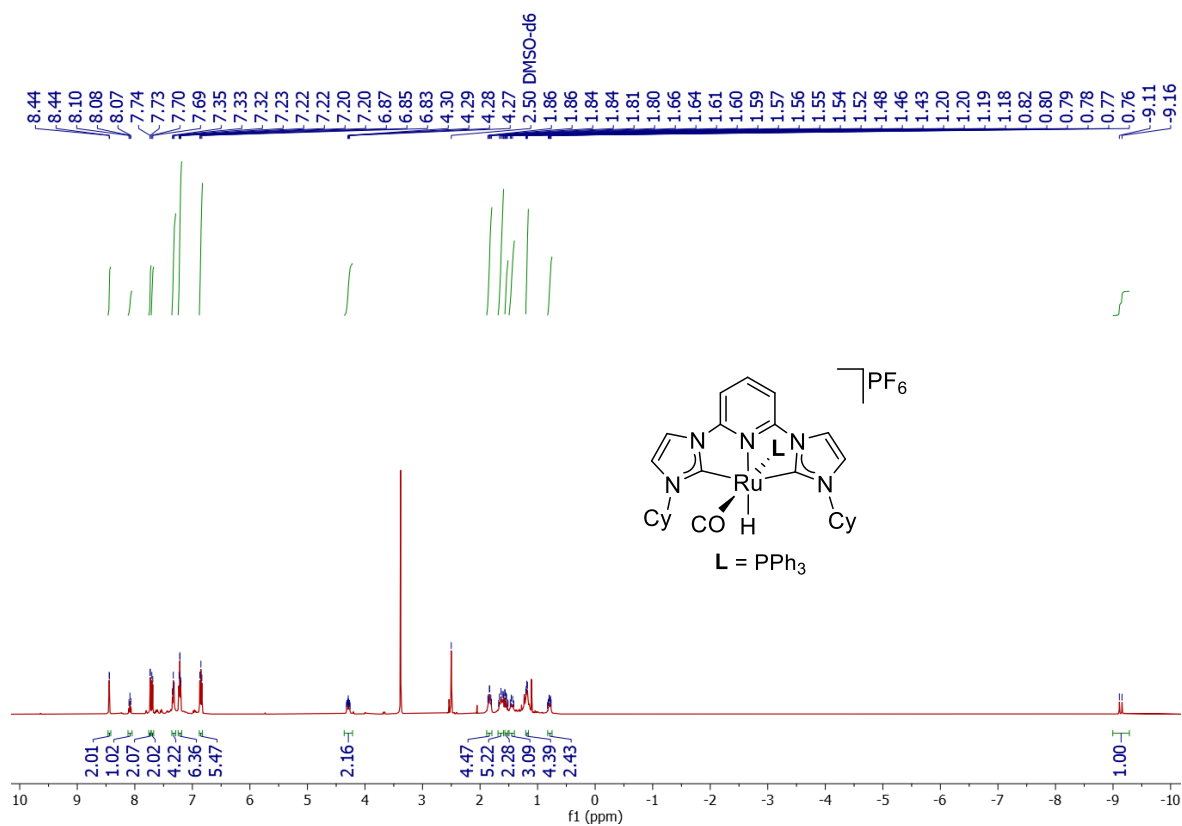

Figure S13.  $^1H$  NMR spectrum of Complex 2c.

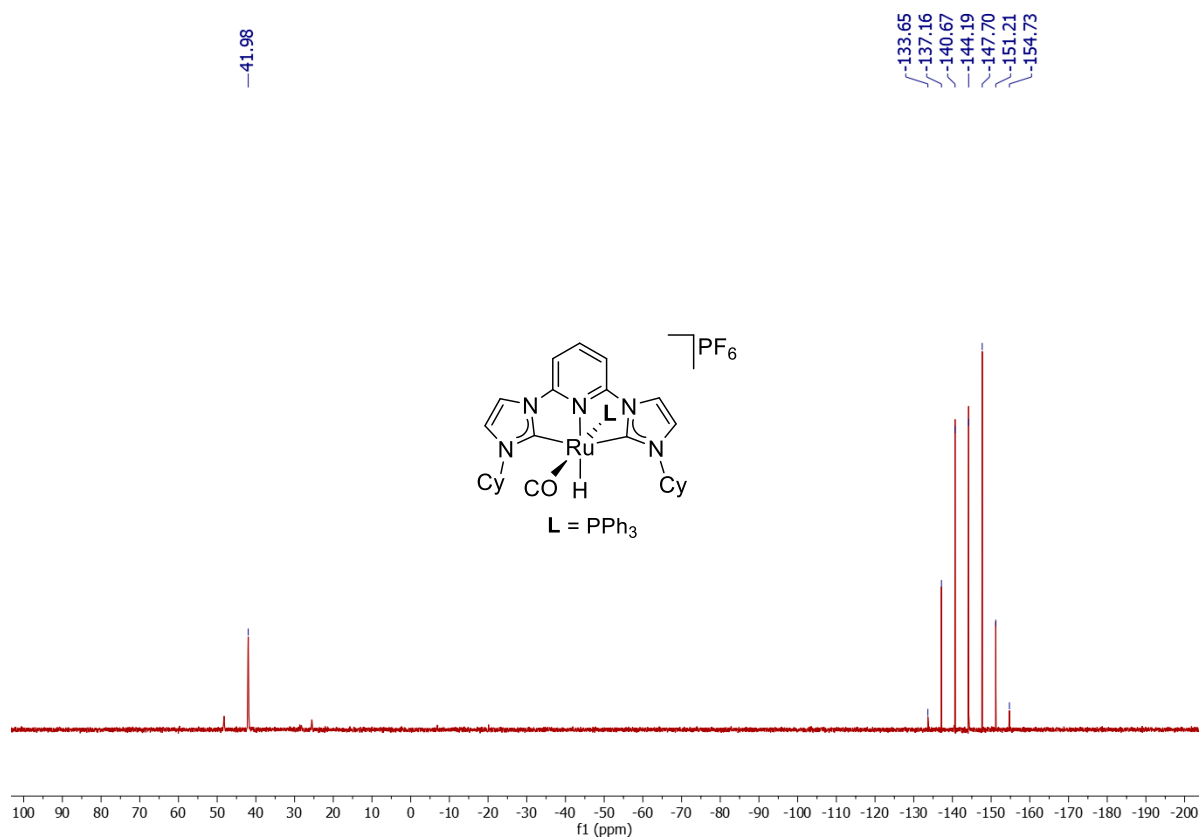

Figure S14.  $^{31}P$  NMR spectrum of Complex 2c.

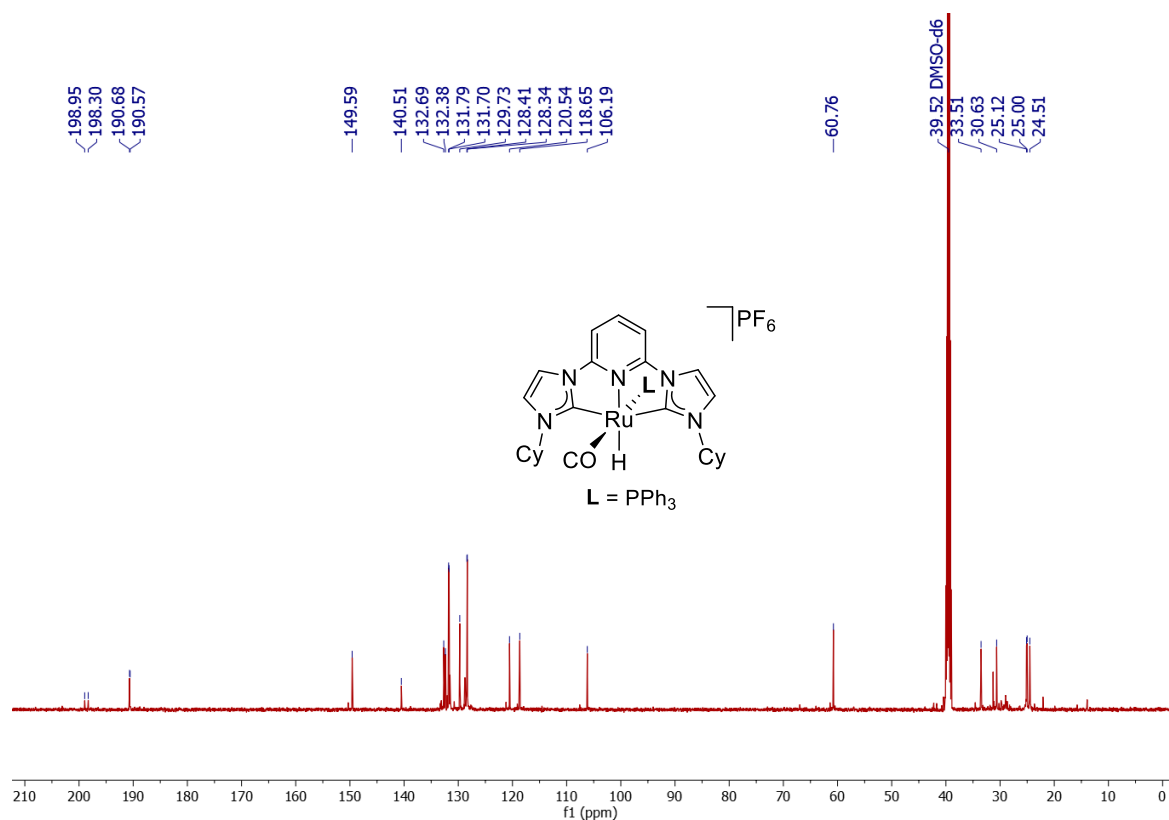

Figure S15. <sup>13</sup>C NMR spectrum of Complex 2c.

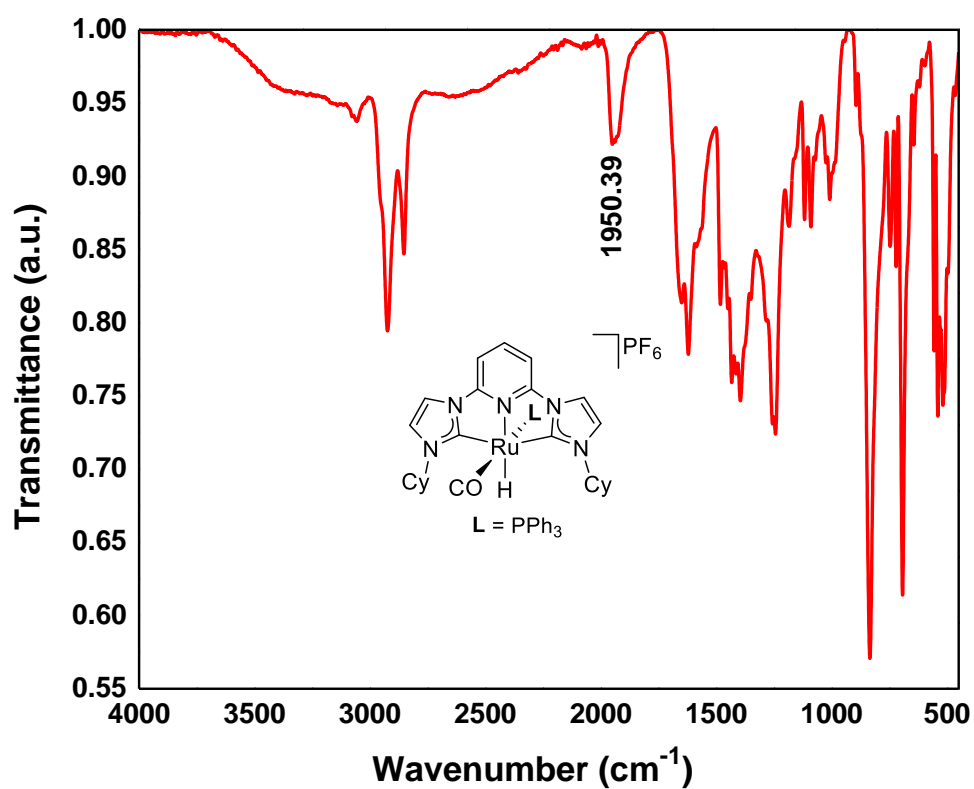

Figure S16. IR spectra of Complex 2c.

# Display Report

## Analysis Info

Analysis Name D:\Data\May 2022\h chem AKS-RKS-176A\_RB2\_01\_17629.d  
Method 2. LCMS tune wide ACN.m  
Sample Name h chem AKS-RKS-176A  
Comment

Acquisition Date 18-May-22 9:05:39 PM  
Operator IIT Indore  
Instrument micrOTOF-Q 228888.10348

## Acquisition Parameter

|             |            |                       |           |                  |           |
|-------------|------------|-----------------------|-----------|------------------|-----------|
| Source Type | ESI        | Ion Polarity          | Positive  | Set Nebulizer    | 2.0 Bar   |
| Focus       | Not active | Set Capillary         | 4500 V    | Set Dry Heater   | 250 °C    |
| Scan Begin  | 50 m/z     | Set End Plate Offset  | -500 V    | Set Dry Gas      | 7.0 l/min |
| Scan End    | 3000 m/z   | Set Collision Cell RF | 650.0 Vpp | Set Divert Valve | Waste     |

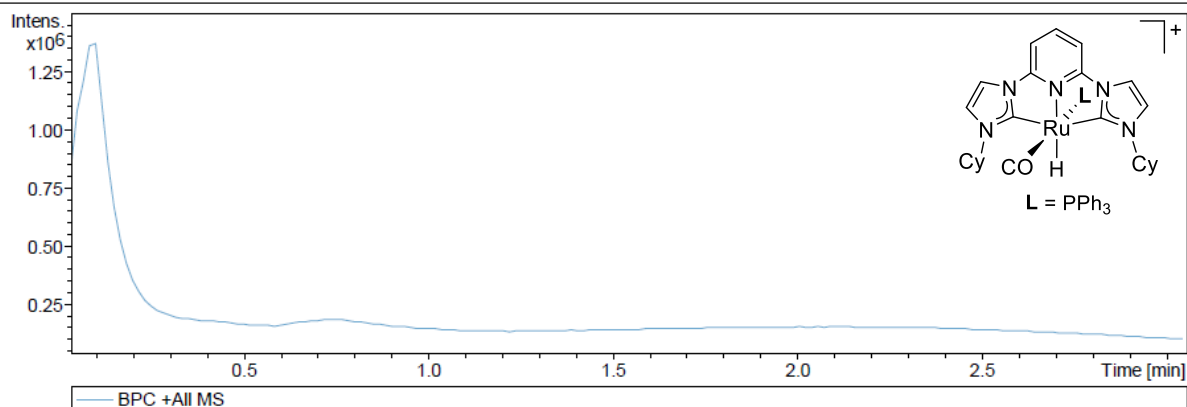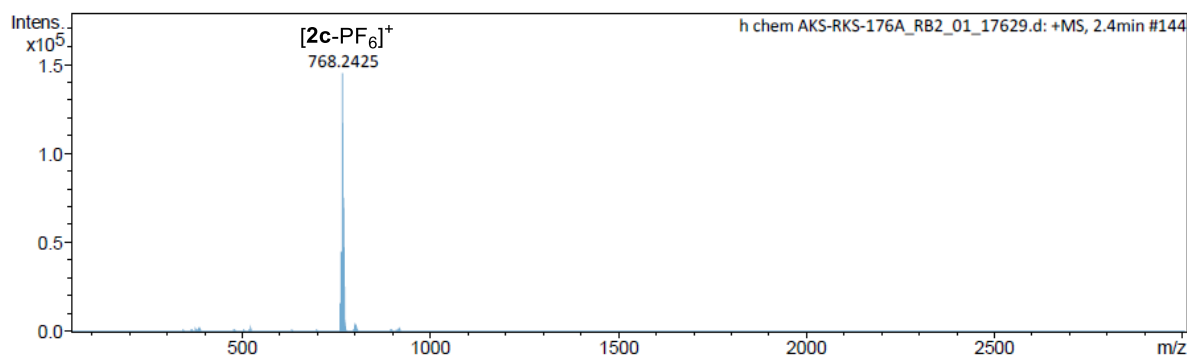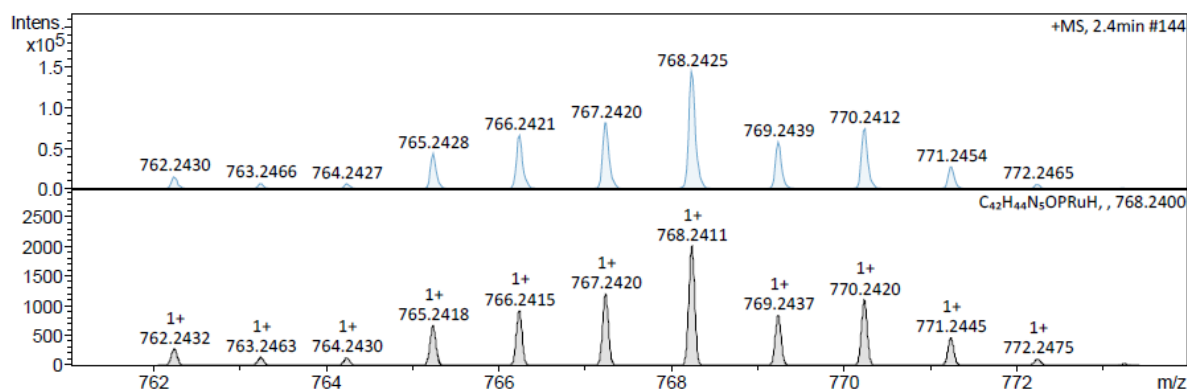

Figure S17. HRMS spectrum of complex 2c.

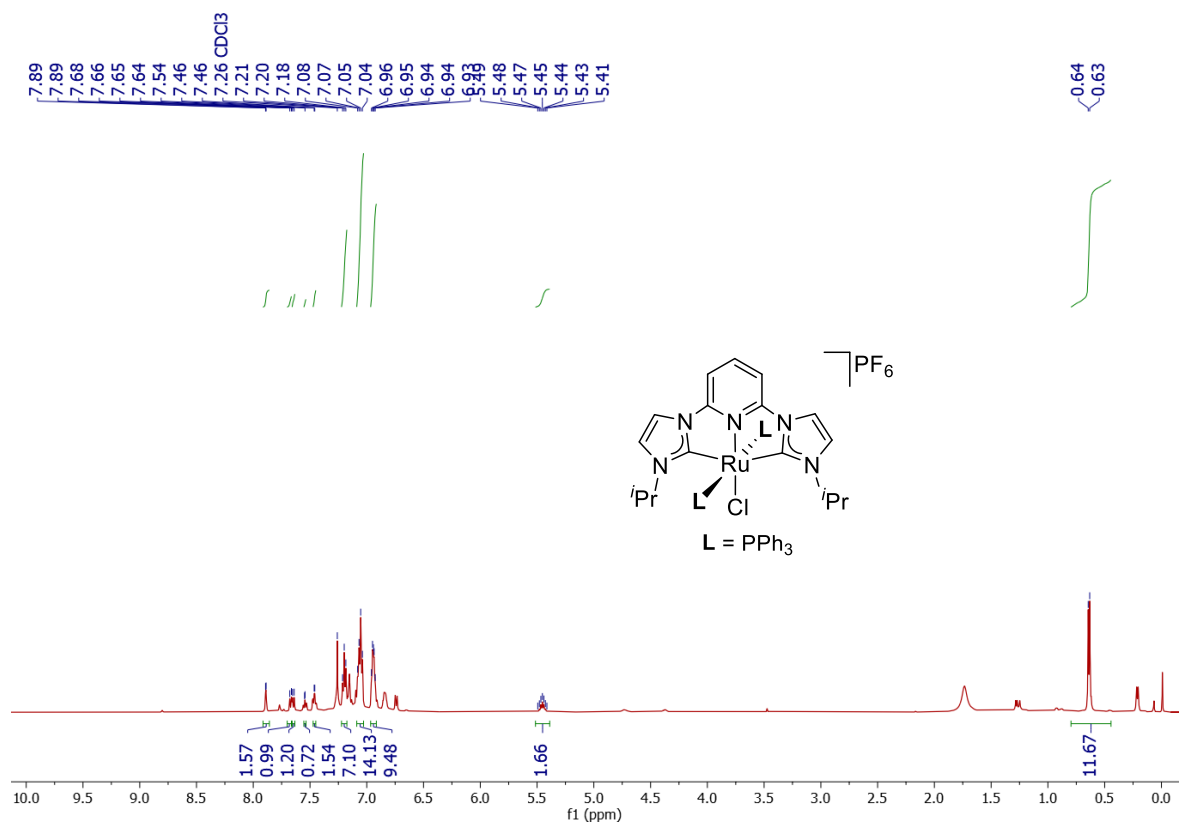

Figure S18. <sup>1</sup>H NMR spectrum of Complex 3b.

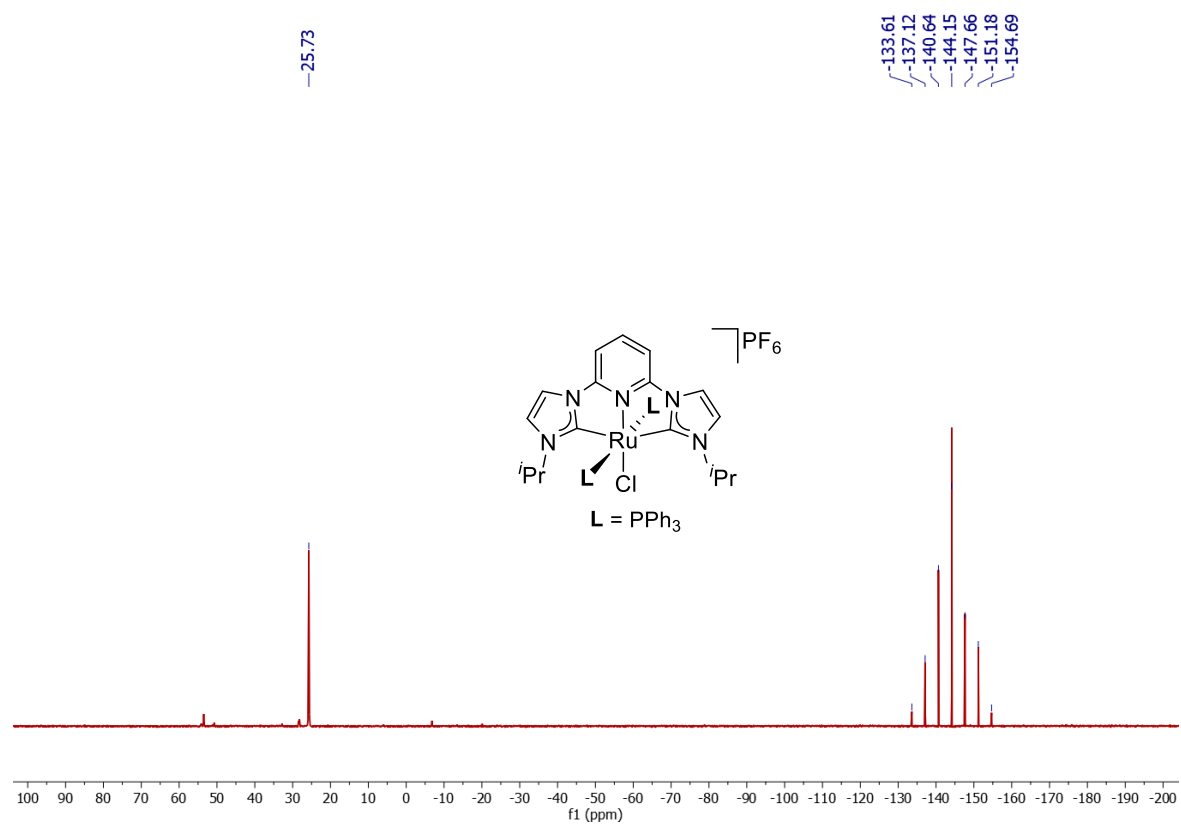

Figure S19. <sup>31</sup>P NMR spectrum of Complex 3b.





## Display Report

### Analysis Info

|               |                                                                      |
|---------------|----------------------------------------------------------------------|
| Analysis Name | C:\Users\Rahul Kumar Singh\Desktop\h chem aks-dy-509-h_RC5_01_5971.d |
| Method        | 8. LCMS tune wide MeOH.m                                             |
| Sample Name   | h chem aks-dy-509-h                                                  |
| Comment       |                                                                      |

Acquisition Date 29-06-2021 20:30:00

Operator IIT Indore  
Instrument microTOF-Q 228888.10348

### Acquisition Parameter

|             |            |                       |           |                  |           |
|-------------|------------|-----------------------|-----------|------------------|-----------|
| Source Type | ESI        | Ion Polarity          | Positive  | Set Nebulizer    | 2.0 Bar   |
| Focus       | Not active | Set Capillary         | 4500 V    | Set Dry Heater   | 250 °C    |
| Scan Begin  | 50 m/z     | Set End Plate Offset  | -500 V    | Set Dry Gas      | 7.0 l/min |
| Scan End    | 3000 m/z   | Set Collision Cell RF | 650.0 Vpp | Set Divert Valve | Waste     |

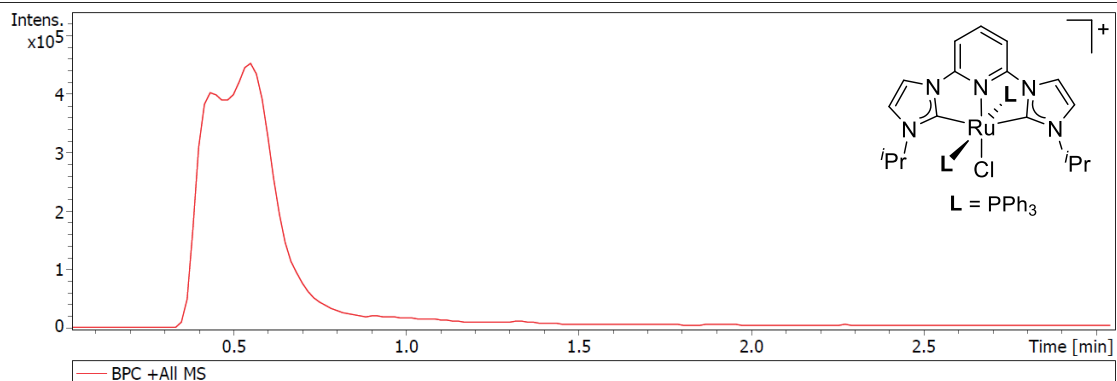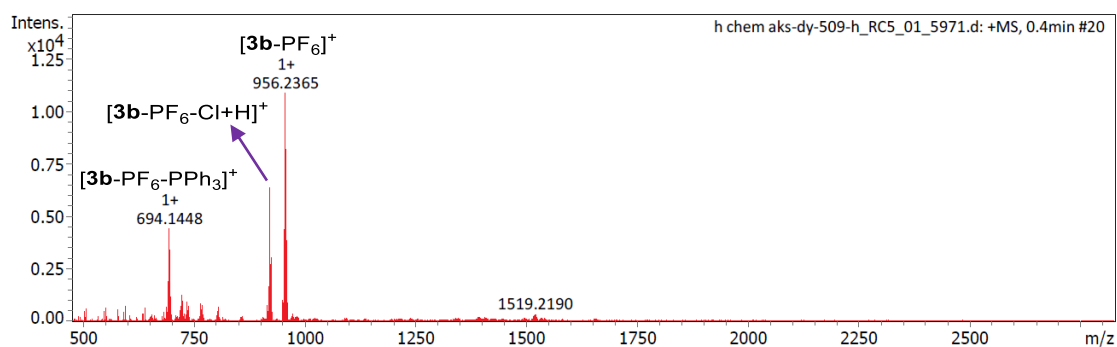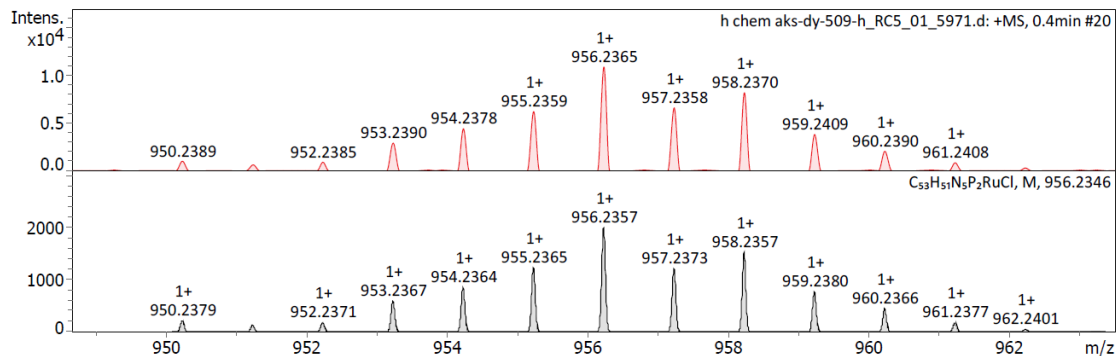

**Figure S21.** HRMS spectrogram of Complex **3b**.

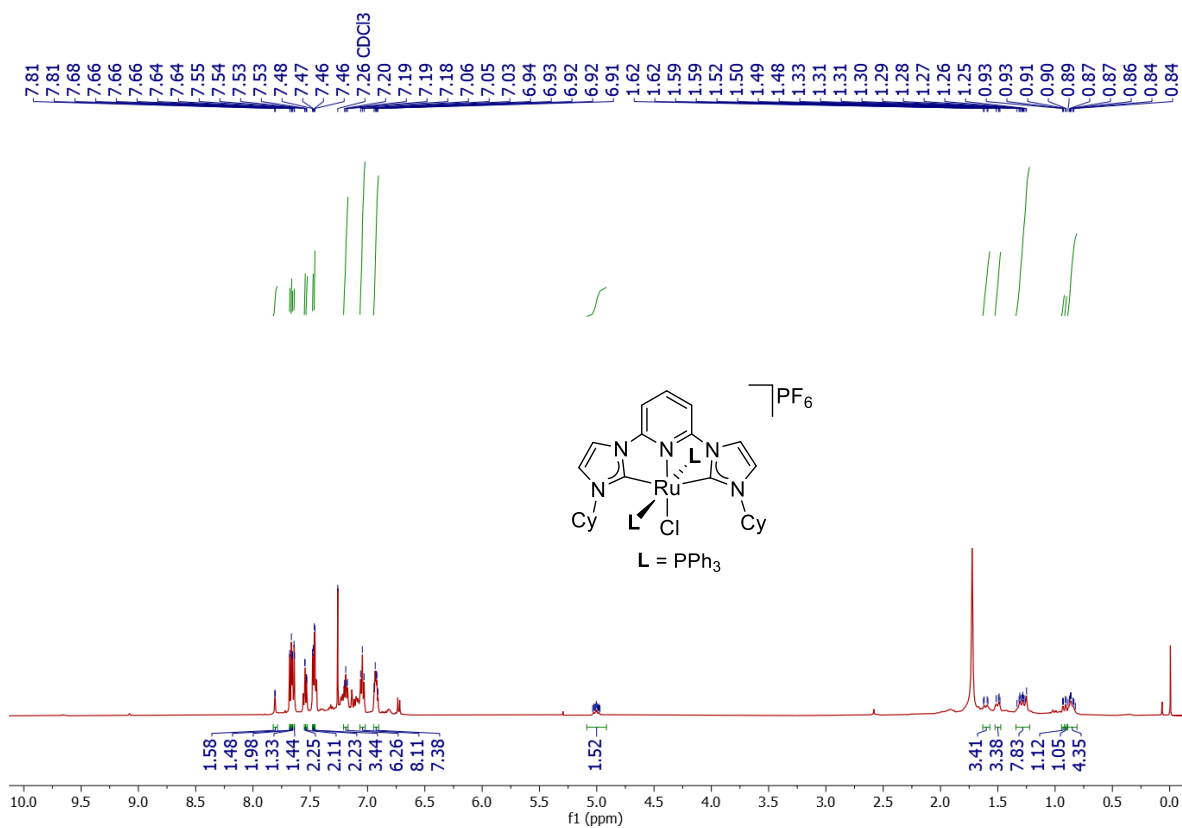

Figure S22. <sup>1</sup>H NMR spectrum of Complex 3c.

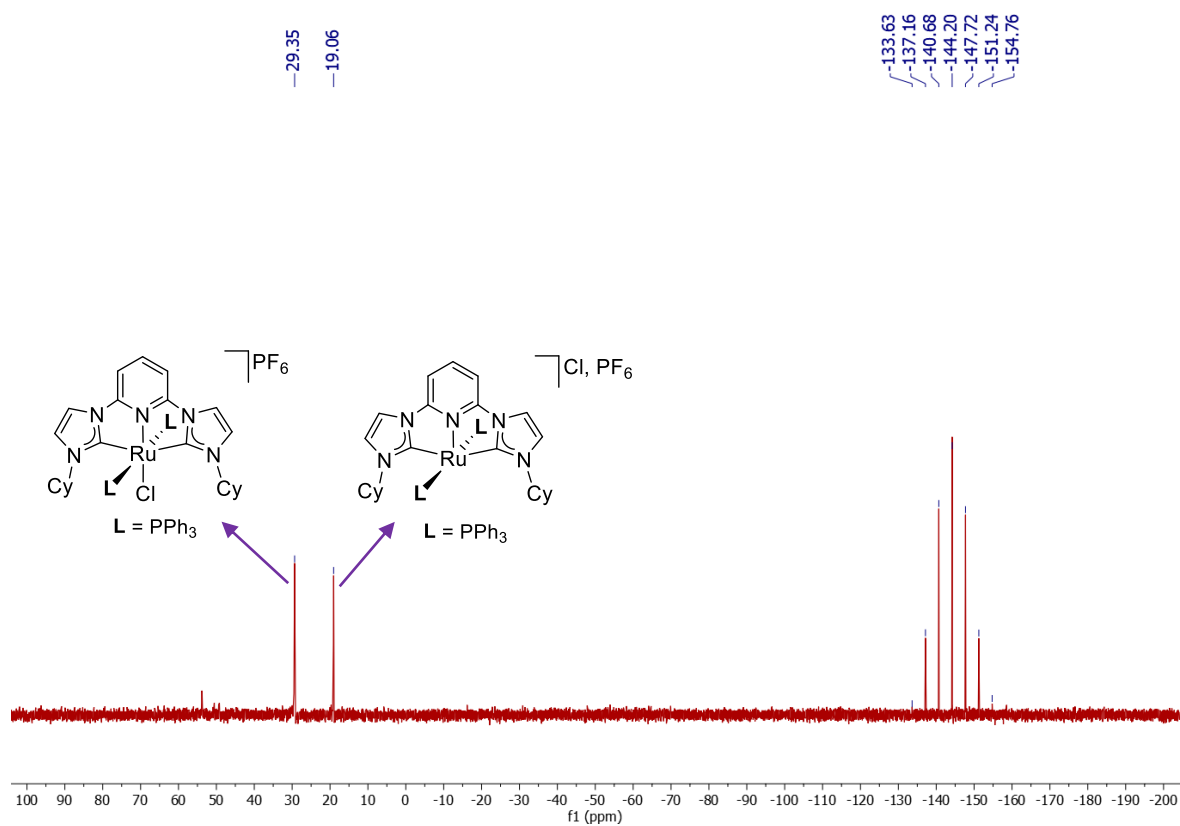

Figure S23. <sup>31</sup>P NMR spectrum of Complex 3c.

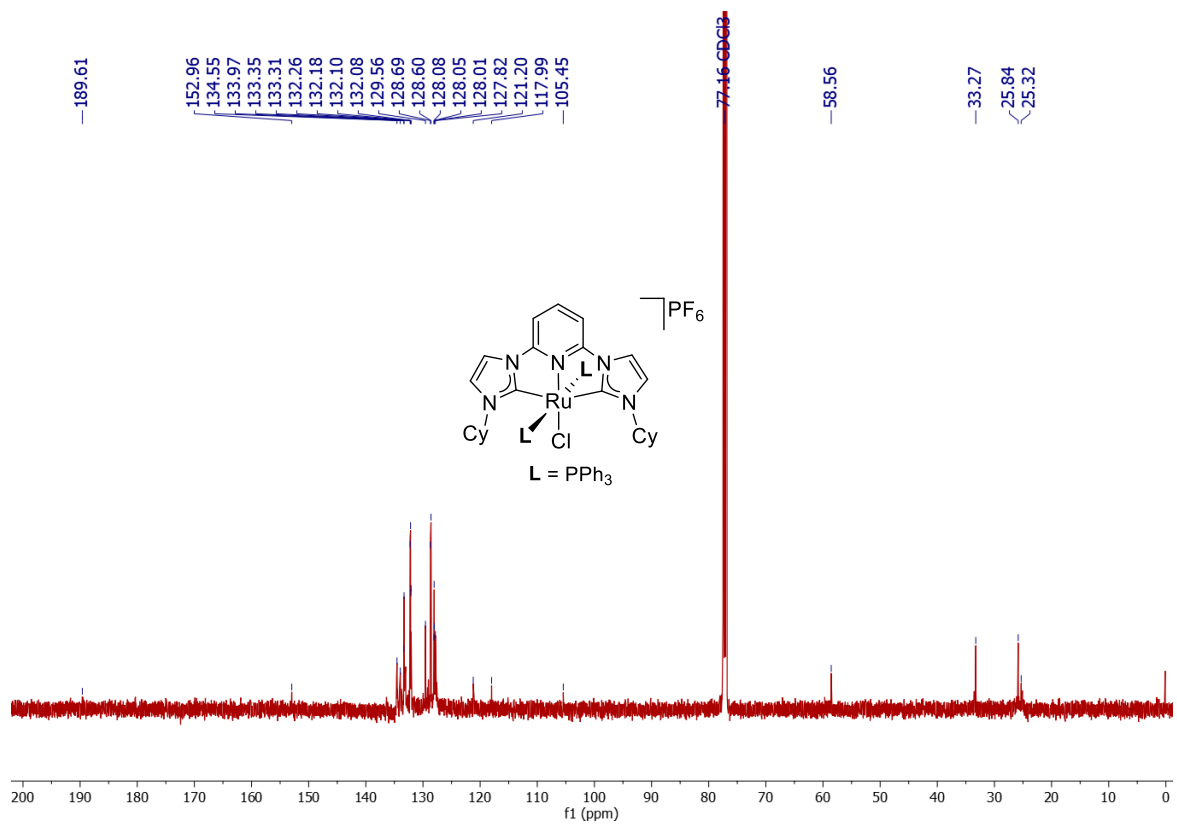

Figure S24.  $^{13}\text{C}$  NMR spectrum of Complex 3c.

# Display Report

## Analysis Info

|               |                                                                      |
|---------------|----------------------------------------------------------------------|
| Analysis Name | C:\Users\Rahul Kumar Singh\Desktop\h chem AKS-RKS-177_RA6_01_17622.d |
| Method        | 2. LCMS tune wide ACN.m                                              |
| Sample Name   | h chem AKS-RKS-177                                                   |
| Comment       |                                                                      |

Acquisition Date 18-05-2022 20:28:40

Operator IIT Indore  
Instrument micrOTOF-Q 228888.10348

## Acquisition Parameter

|             |            |                       |           |                  |           |
|-------------|------------|-----------------------|-----------|------------------|-----------|
| Source Type | ESI        | Ion Polarity          | Positive  | Set Nebulizer    | 2.0 Bar   |
| Focus       | Not active | Set Capillary         | 4500 V    | Set Dry Heater   | 250 °C    |
| Scan Begin  | 50 m/z     | Set End Plate Offset  | -500 V    | Set Dry Gas      | 7.0 l/min |
| Scan End    | 3000 m/z   | Set Collision Cell RF | 650.0 Vpp | Set Divert Valve | Waste     |

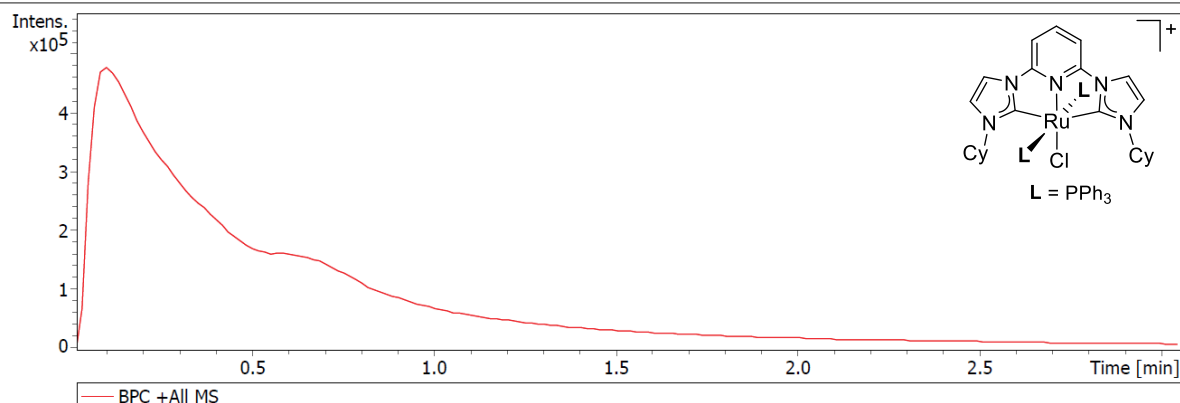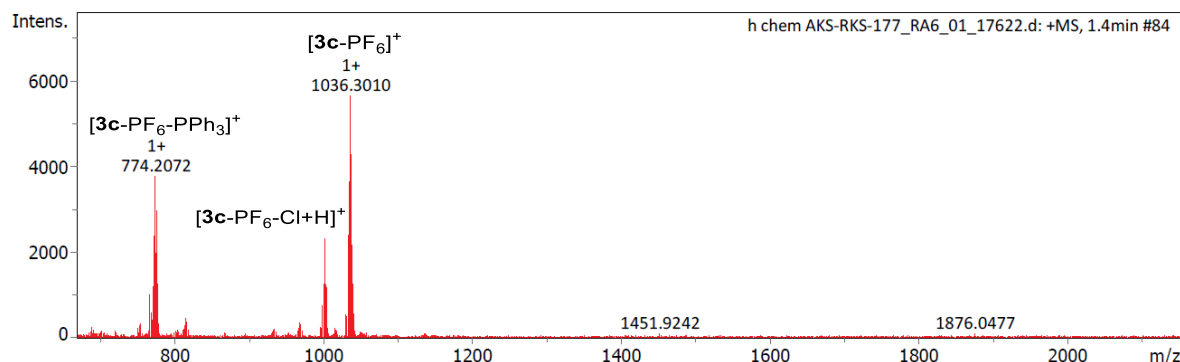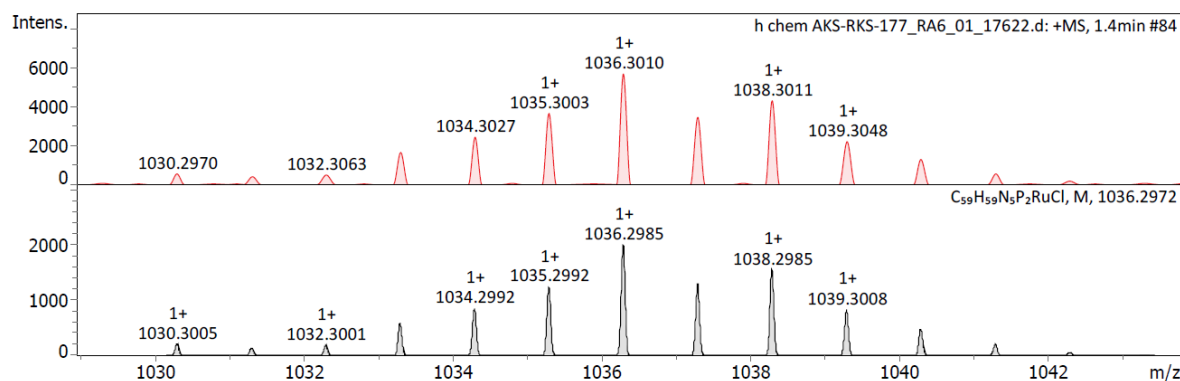

**Figure S25.** HRMS spectrogram of Complex **3c**.

# Display Report

## Analysis Info

Analysis Name C:\Users\Rahul Kumar Singh\Desktop\NMR and Mass\Mass data\h chem AKS-RKS-177\_RA6\_01\_17623.d  
Method 2. LCMS tune wide ACN.m  
Sample Name h chem AKS-RKS-177  
Comment

Acquisition Date 18-05-2022 20:35:41  
Operator IIT Indore  
Instrument microTOF-Q 228888.10348

## Acquisition Parameter

|             |            |                       |           |                  |           |
|-------------|------------|-----------------------|-----------|------------------|-----------|
| Source Type | ESI        | Ion Polarity          | Positive  | Set Nebulizer    | 2.0 Bar   |
| Focus       | Not active | Set Capillary         | 4500 V    | Set Dry Heater   | 250 °C    |
| Scan Begin  | 50 m/z     | Set End Plate Offset  | -500 V    | Set Dry Gas      | 7.0 l/min |
| Scan End    | 3000 m/z   | Set Collision Cell RF | 650.0 Vpp | Set Divert Valve | Waste     |

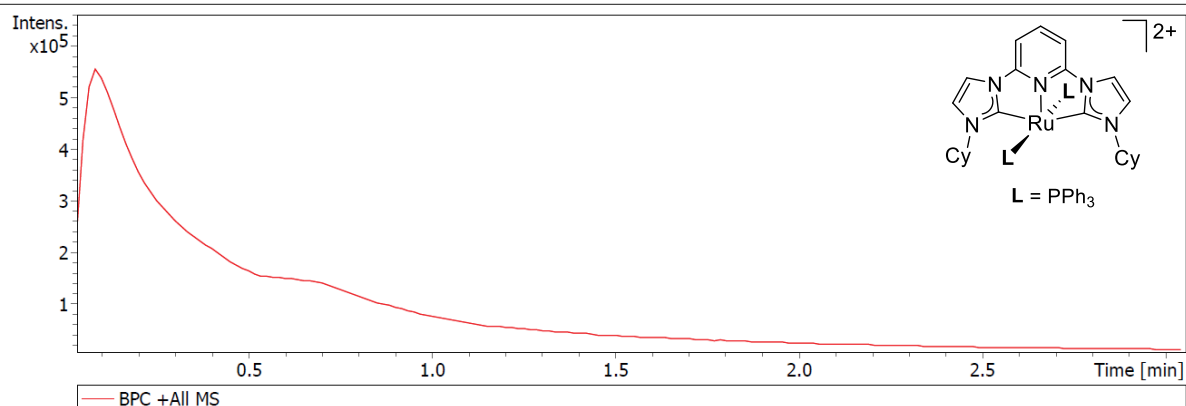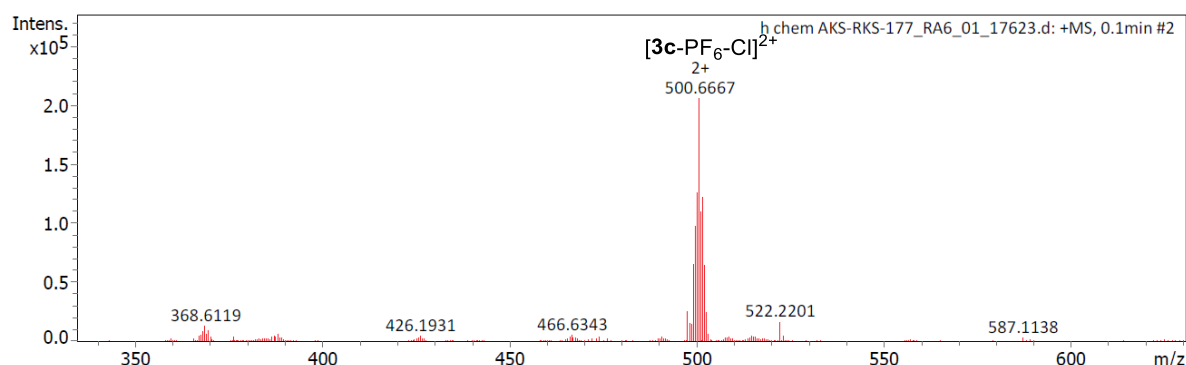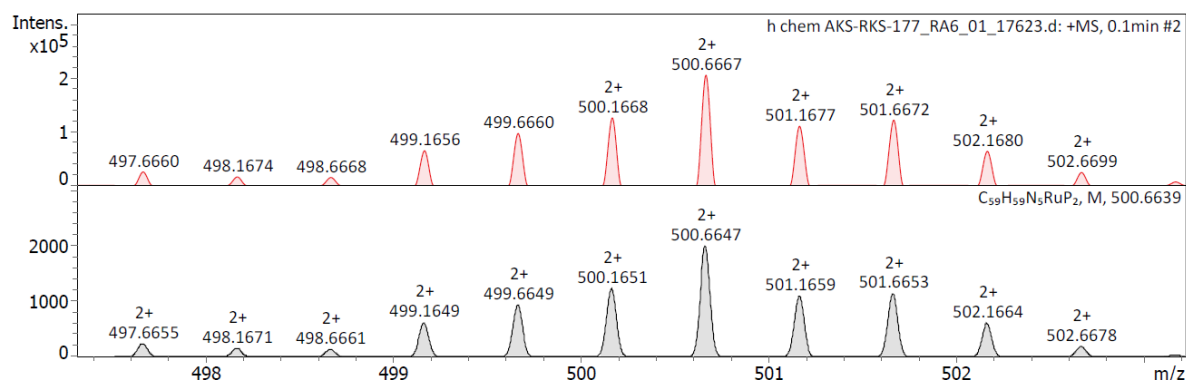

Figure S26. HRMS spectrogram of dicationic complex [3c-PF<sub>6</sub>-Cl]<sup>2+</sup>.

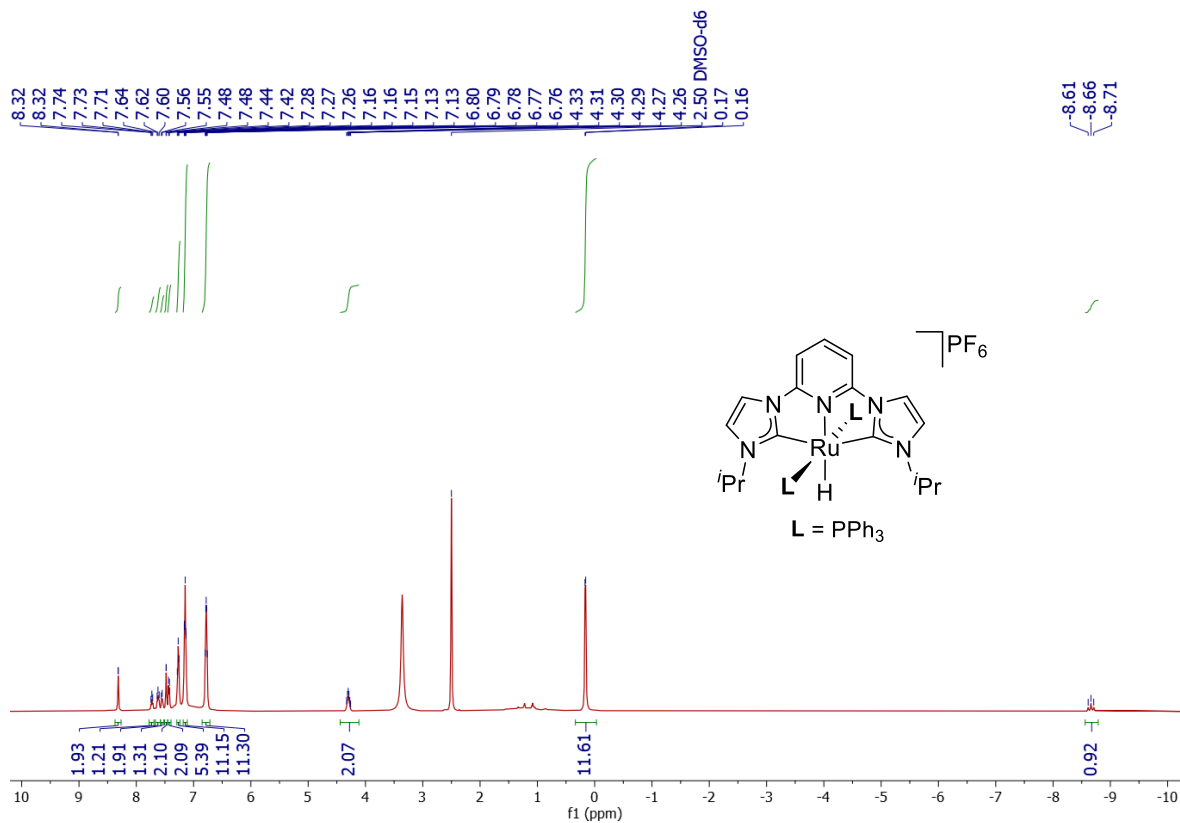

Figure S27. <sup>1</sup>H NMR spectrum of Complex 4b.

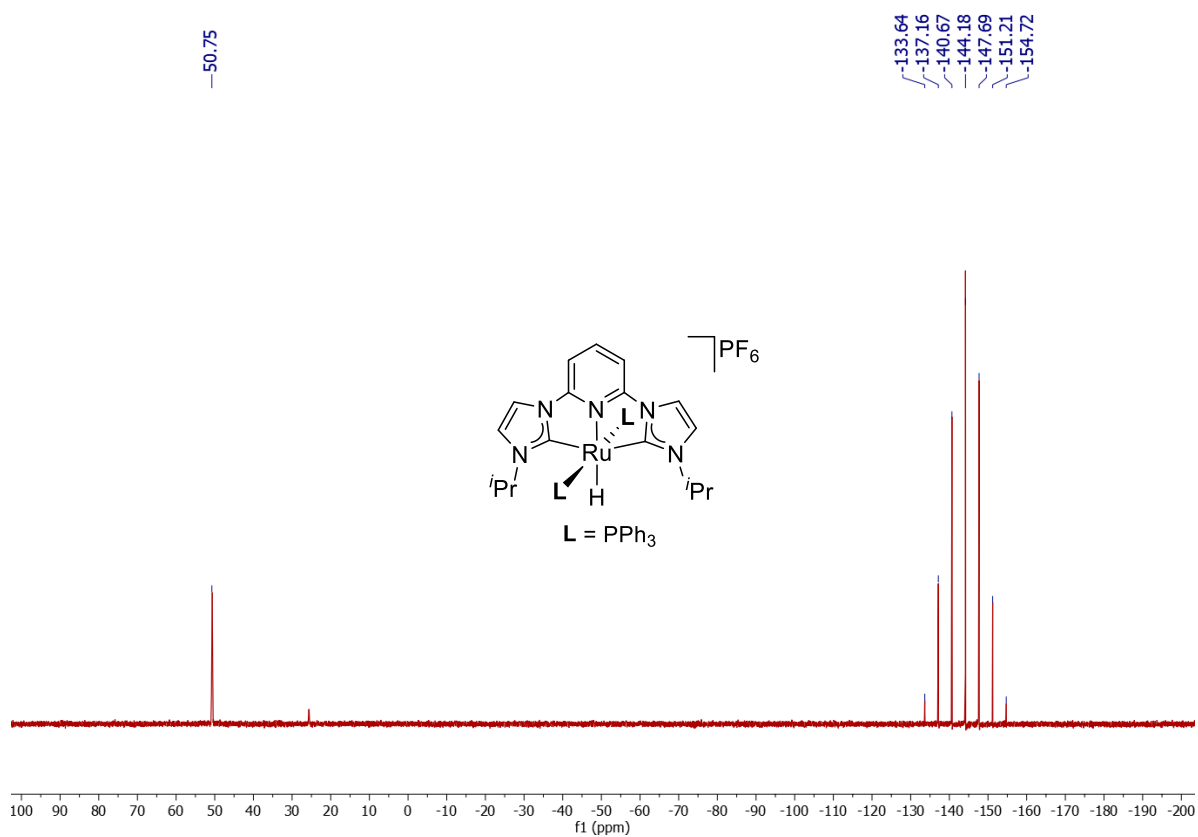

Figure S28. <sup>31</sup>P NMR spectrum of Complex 4b.

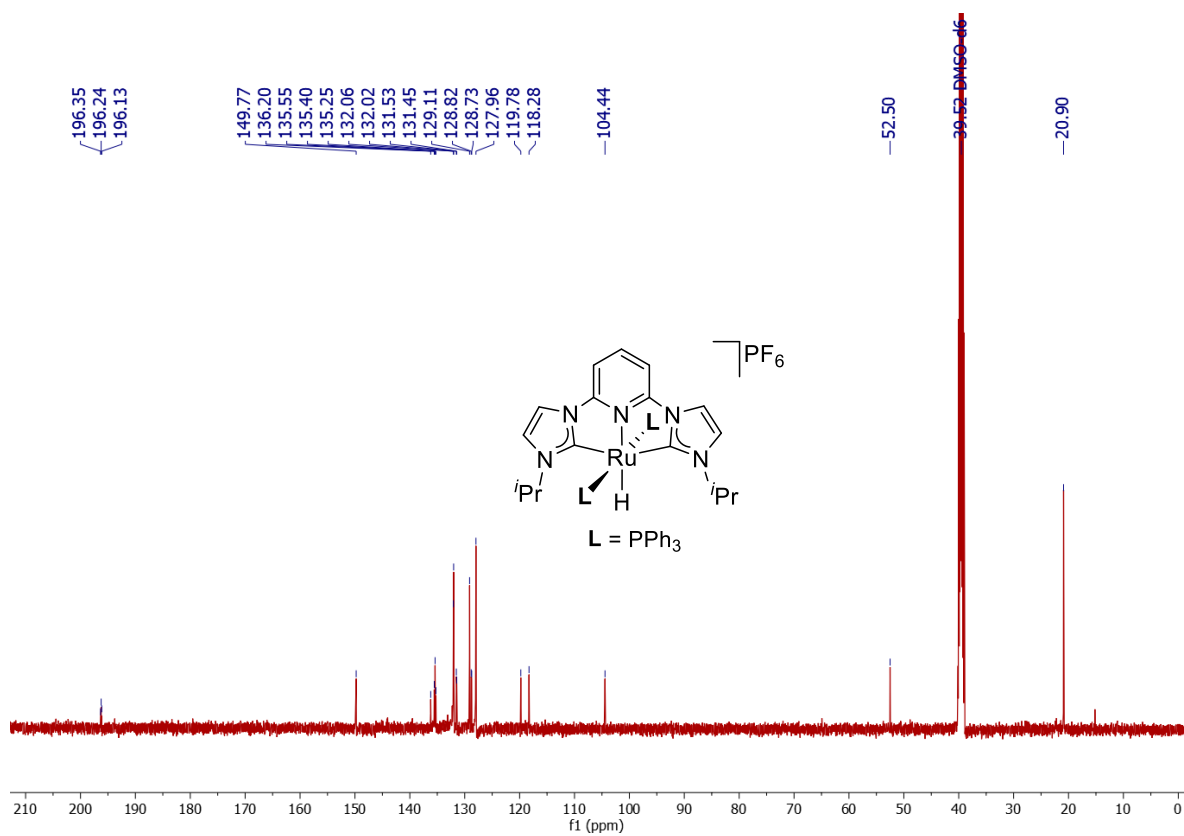

Figure S29. <sup>13</sup>C NMR spectrum of Complex 4b.



## Display Report

### Analysis Info

|                  |                                                                      |
|------------------|----------------------------------------------------------------------|
| Analysis Name    | C:\Users\Rahul Kumar Singh\Desktop\h chem-aks-dy-510-h_RC6_01_5972.d |
| Method           | 8. LCMS tune wide MeOH.m                                             |
| Sample Name      | h chem-aks-dy-510-h                                                  |
| Comment          |                                                                      |
| Acquisition Date | 29-06-2021 20:41:23                                                  |
| Operator         | IIT Indore                                                           |
| Instrument       | micrOTOF-Q 228888.10348                                              |

### Acquisition Parameter

|             |            |                       |           |                  |           |
|-------------|------------|-----------------------|-----------|------------------|-----------|
| Source Type | ESI        | Ion Polarity          | Positive  | Set Nebulizer    | 2.0 Bar   |
| Focus       | Not active | Set Capillary         | 4500 V    | Set Dry Heater   | 250 °C    |
| Scan Begin  | 50 m/z     | Set End Plate Offset  | -500 V    | Set Dry Gas      | 7.0 l/min |
| Scan End    | 3000 m/z   | Set Collision Cell RF | 650.0 Vpp | Set Divert Valve | Waste     |

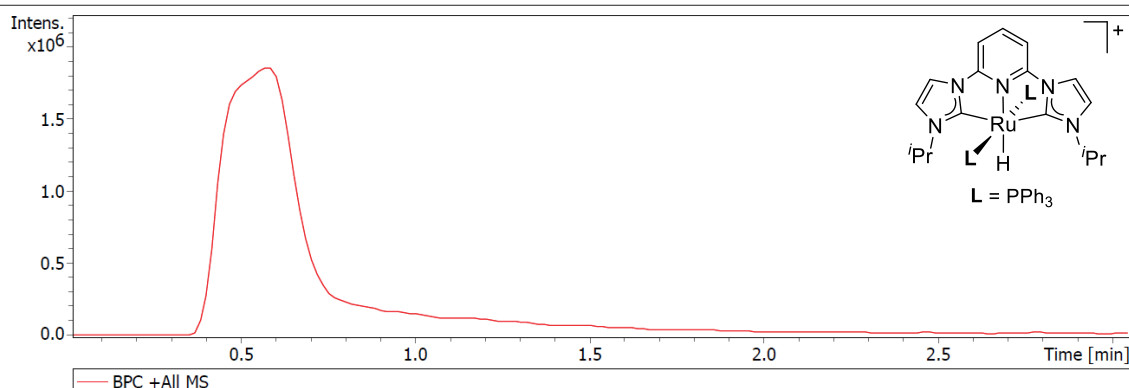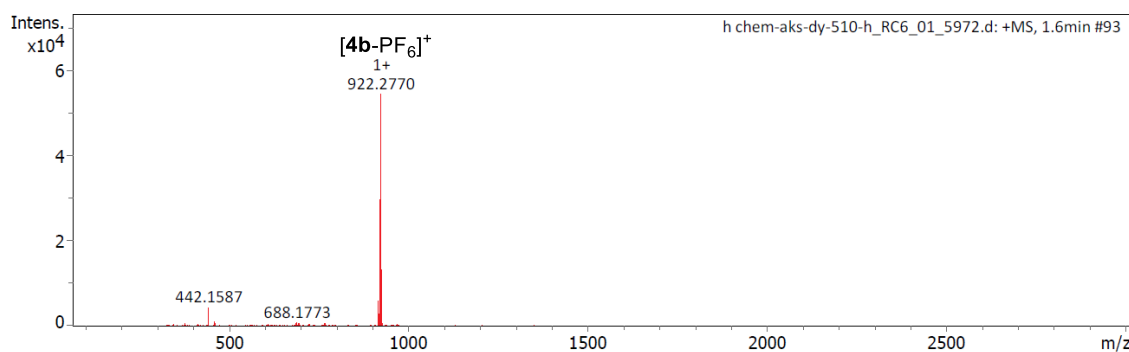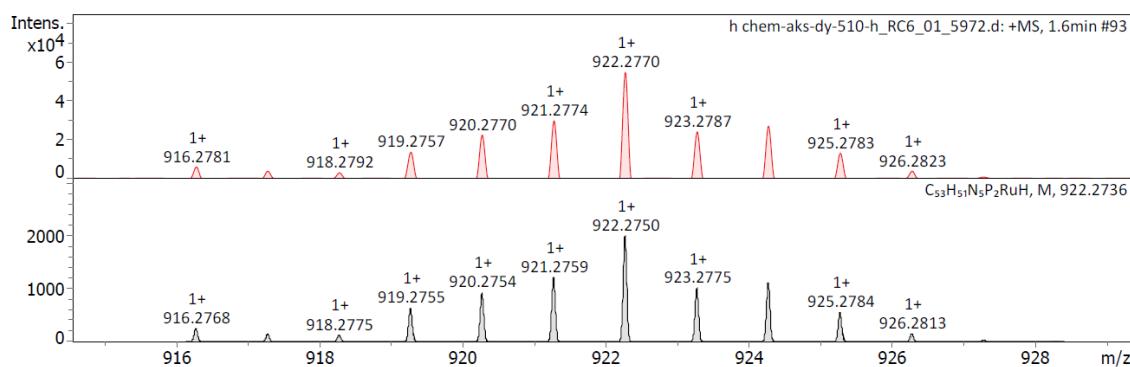

**Figure S30.** HRMS spectrogram of Complex **4b**.

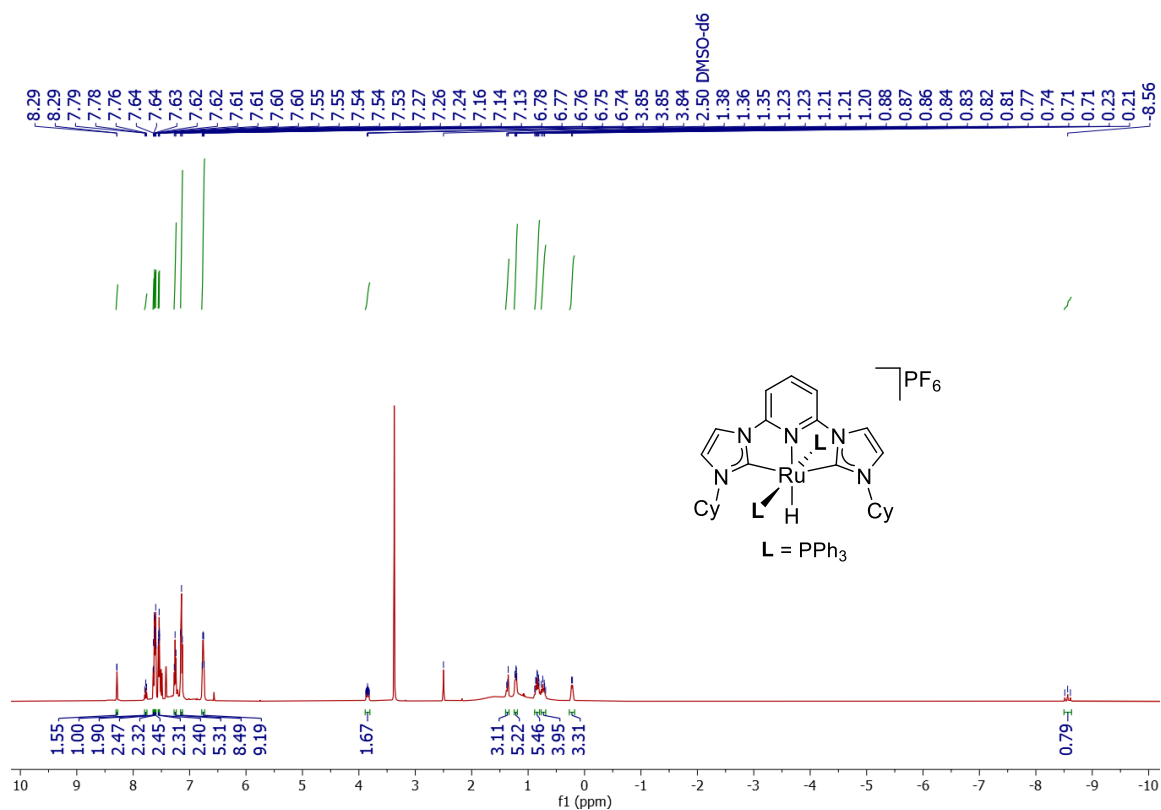

Figure S31. <sup>1</sup>H NMR spectrum of Complex 4c.

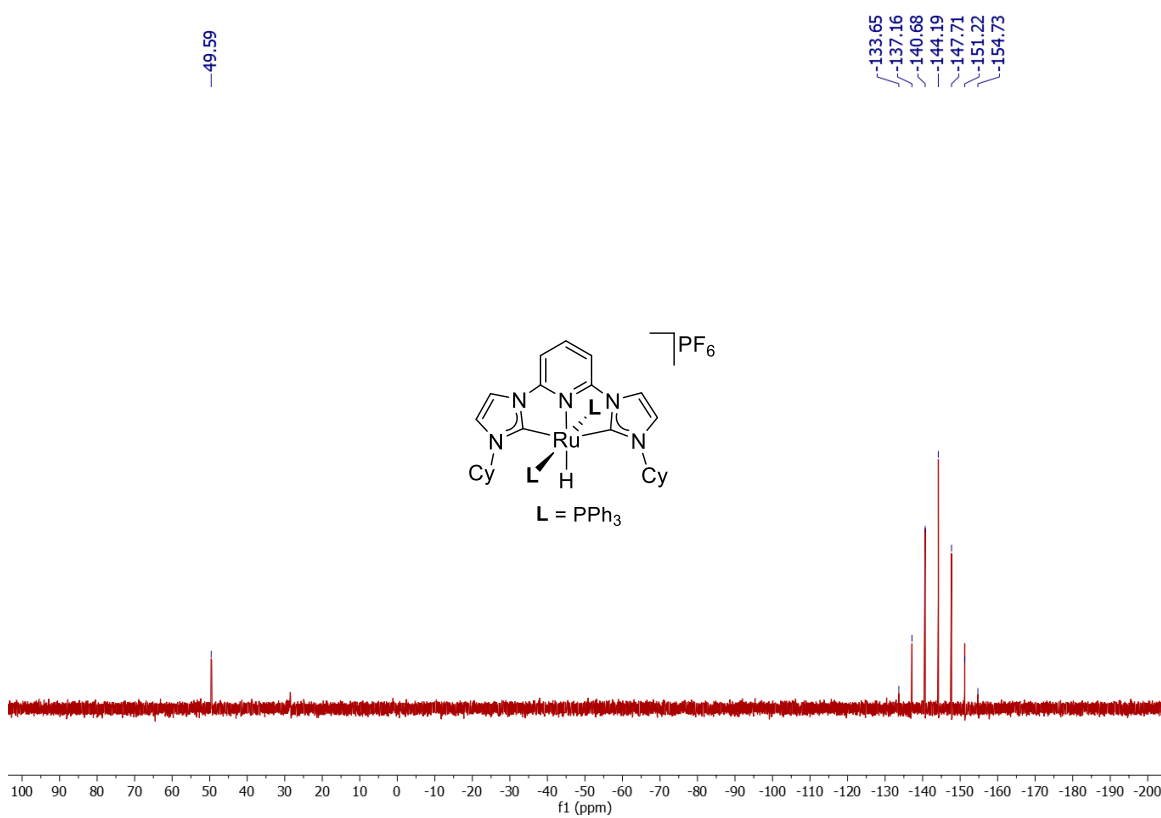

Figure S32. <sup>31</sup>P NMR spectrum of Complex 4c.

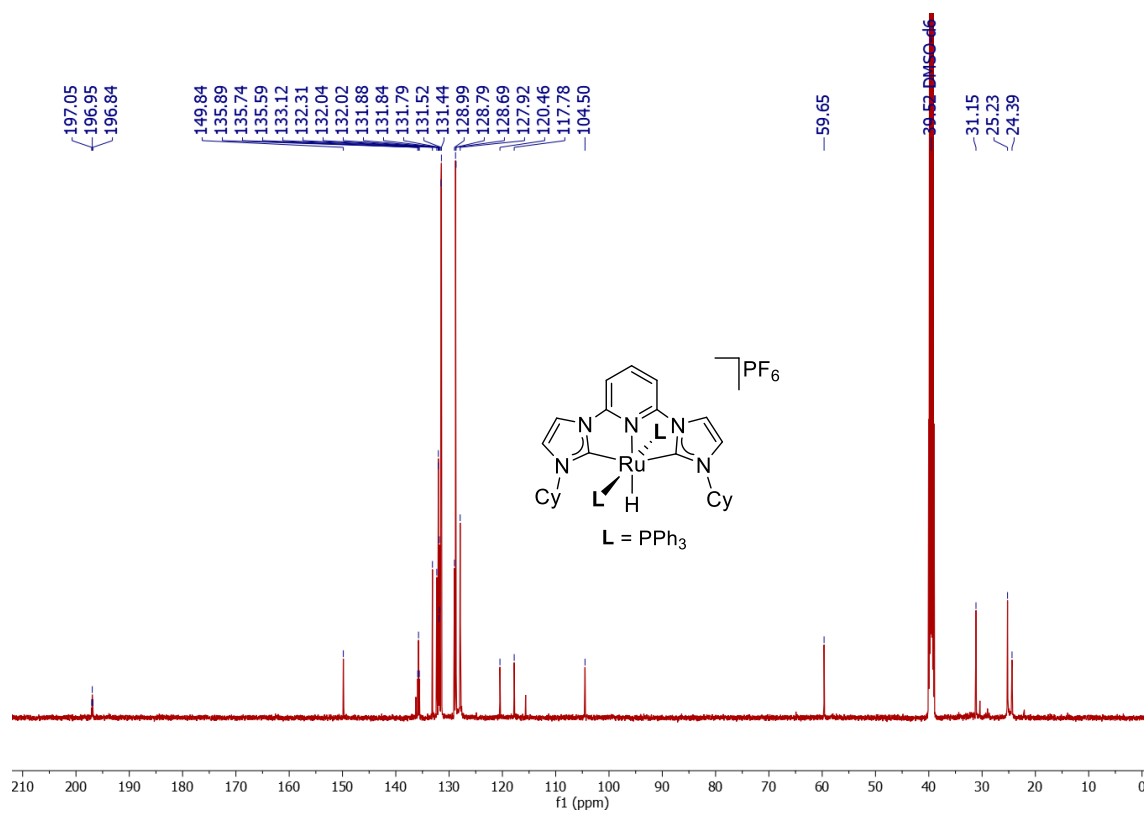

Figure S33. <sup>13</sup>C NMR spectrum of Complex 4c.



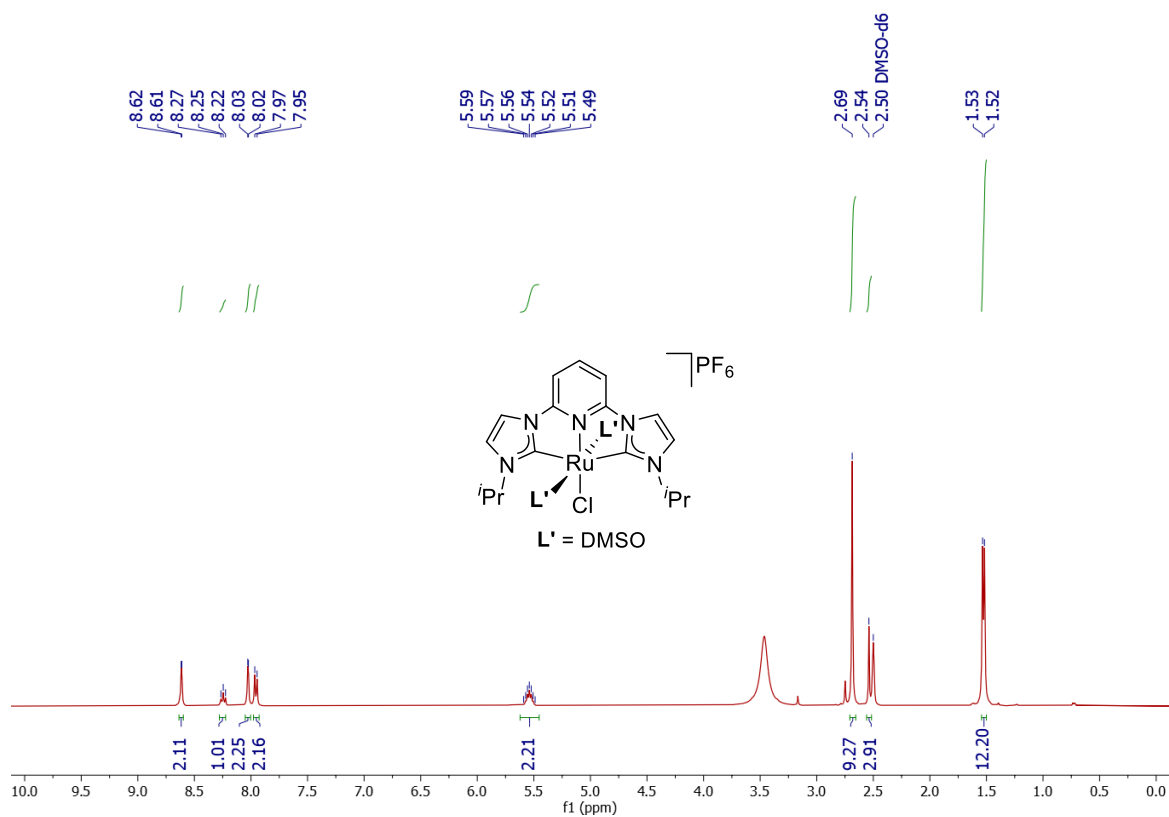

Figure S35.  $^1\text{H}$  NMR spectrum of Complex 6b.

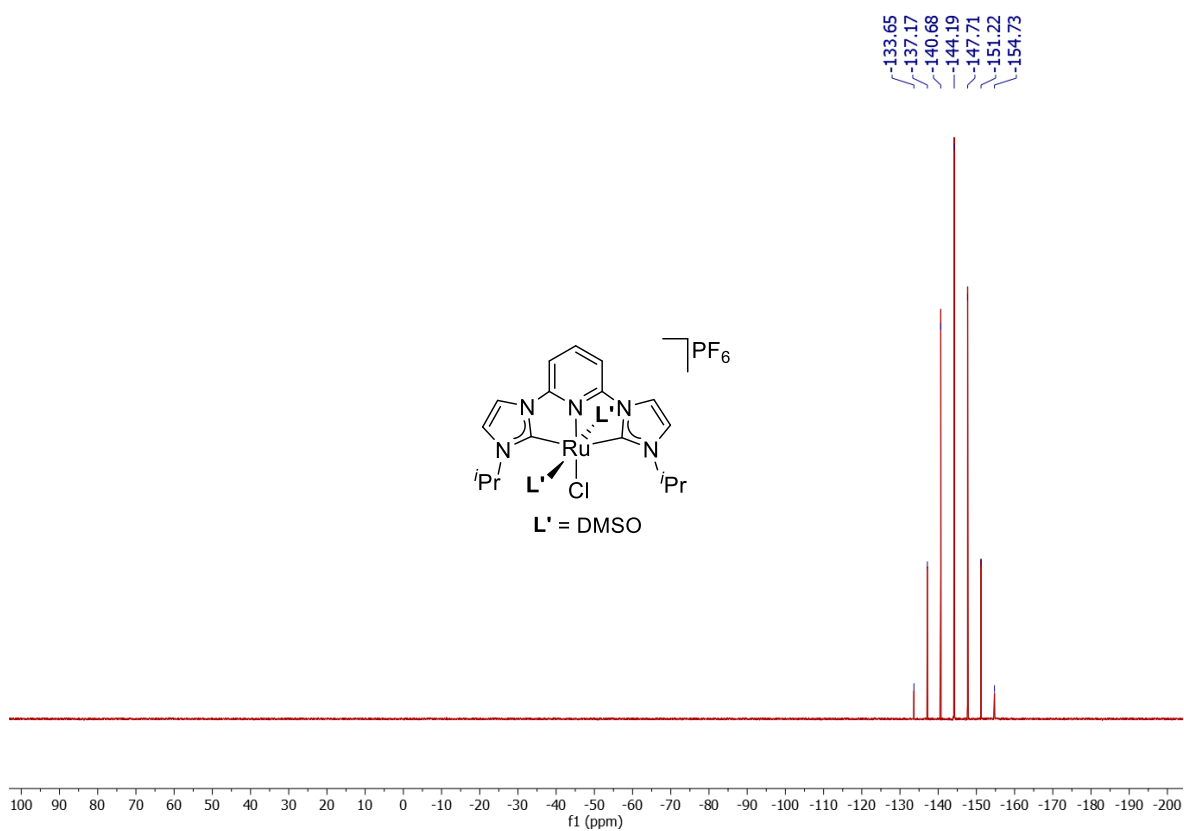

Figure S36.  $^{31}\text{P}$  NMR spectrum of Complex 6b.

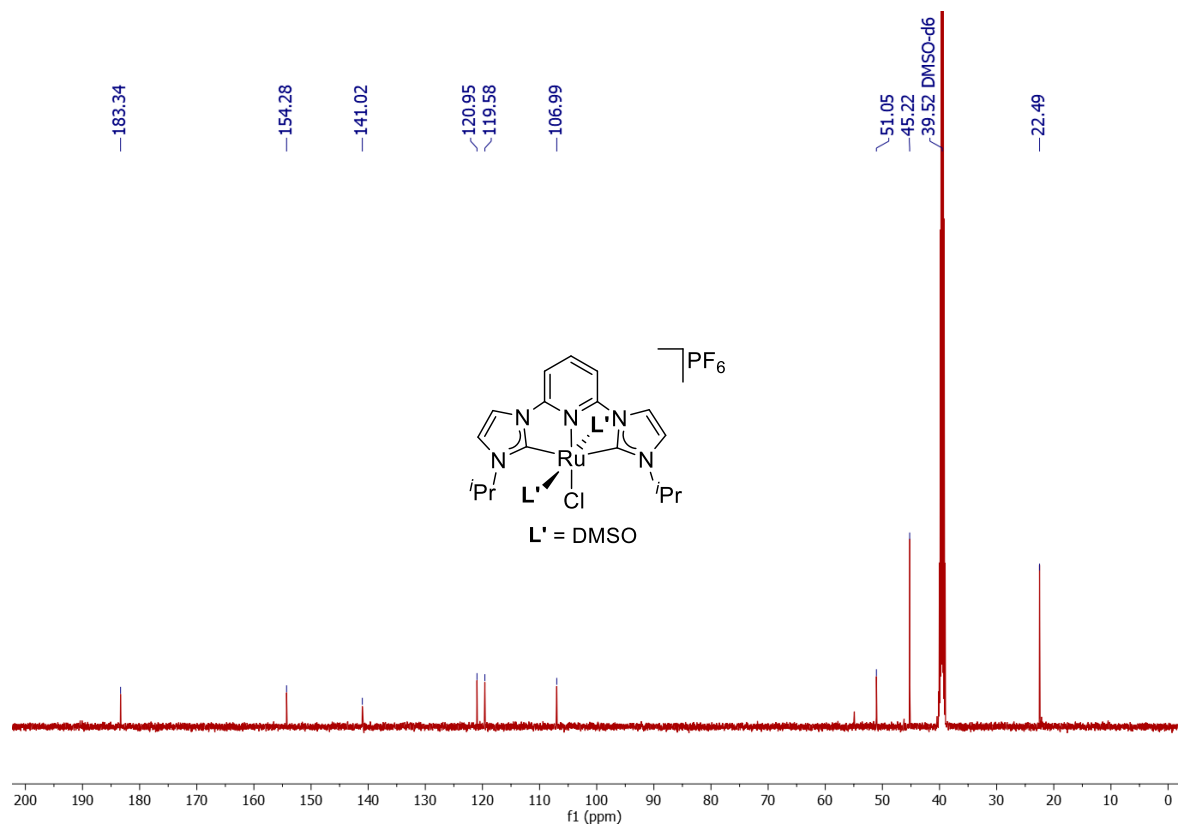

Figure S37. <sup>13</sup>C NMR spectrum of Complex 6b.

## Display Report

### Analysis Info

|               |                                                          |
|---------------|----------------------------------------------------------|
| Analysis Name | D:\Data\October 2021\h chem AKS-DY-DIPR-a_RA3_01_10202.d |
| Method        | 2. LCMS tune wide ACN.m                                  |
| Sample Name   | h chem AKS-DY-DIPR-a                                     |
| Comment       |                                                          |

Acquisition Date 10/21/2021 4:07:56 PM

Operator IIT Indore  
Instrument micrOTOF-Q 228888.10348

### Acquisition Parameter

|             |            |                       |           |
|-------------|------------|-----------------------|-----------|
| Source Type | ESI        | Ion Polarity          | Positive  |
| Focus       | Not active | Set Capillary         | 4500 V    |
| Scan Begin  | 50 m/z     | Set End Plate Offset  | -500 V    |
| Scan End    | 3000 m/z   | Set Collision Cell RF | 650.0 Vpp |
|             |            | Set Nebulizer         | 2.0 Bar   |
|             |            | Set Dry Heater        | 250 °C    |
|             |            | Set Dry Gas           | 7.0 l/min |
|             |            | Set Divert Valve      | Waste     |

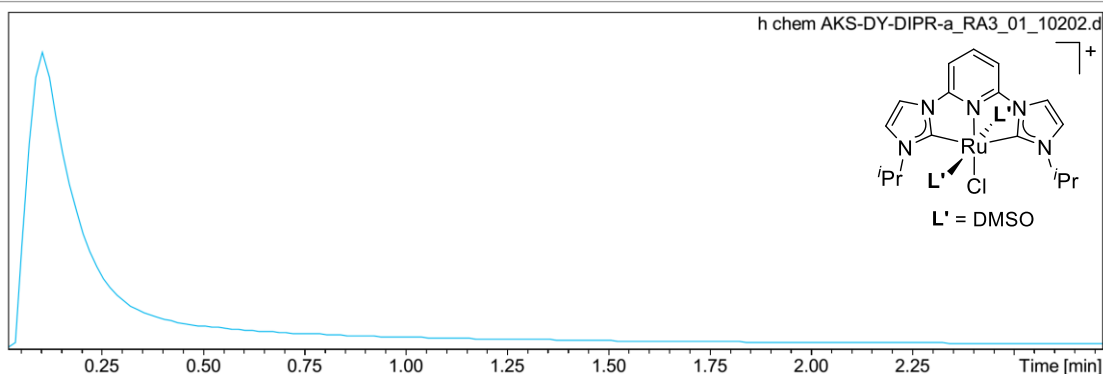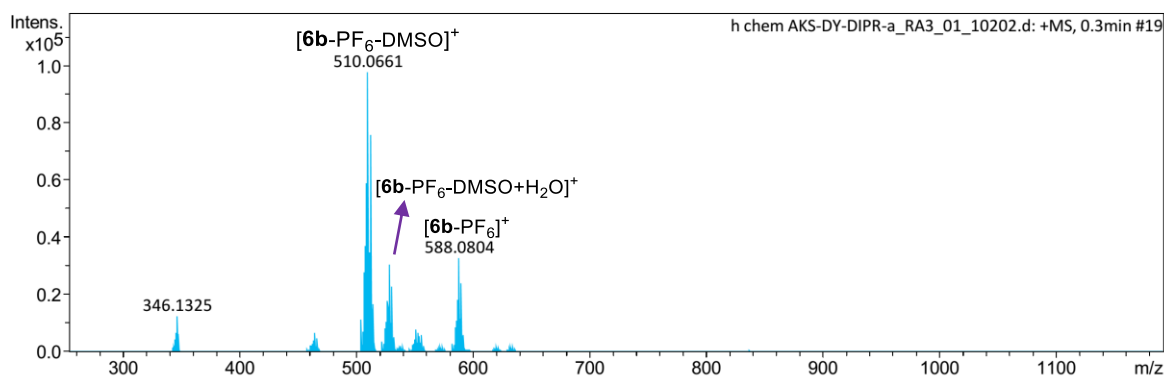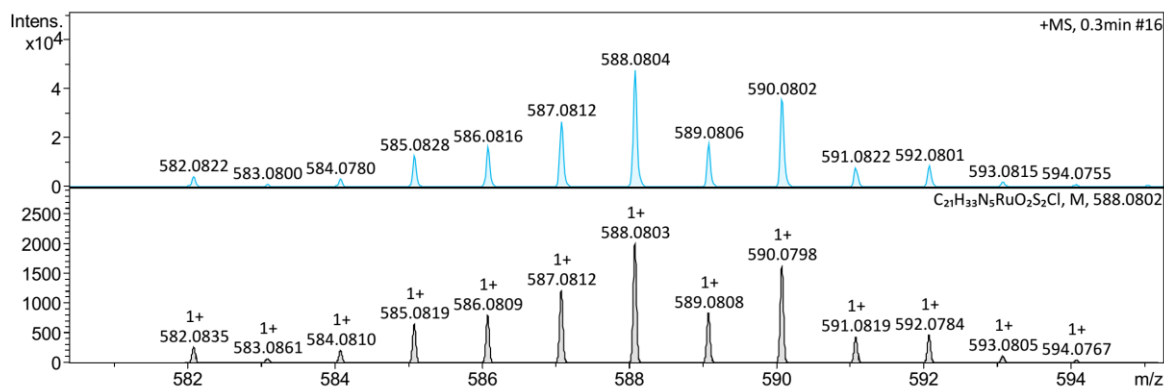

**Figure S38.** HRMS spectrum of Complex **6b**.

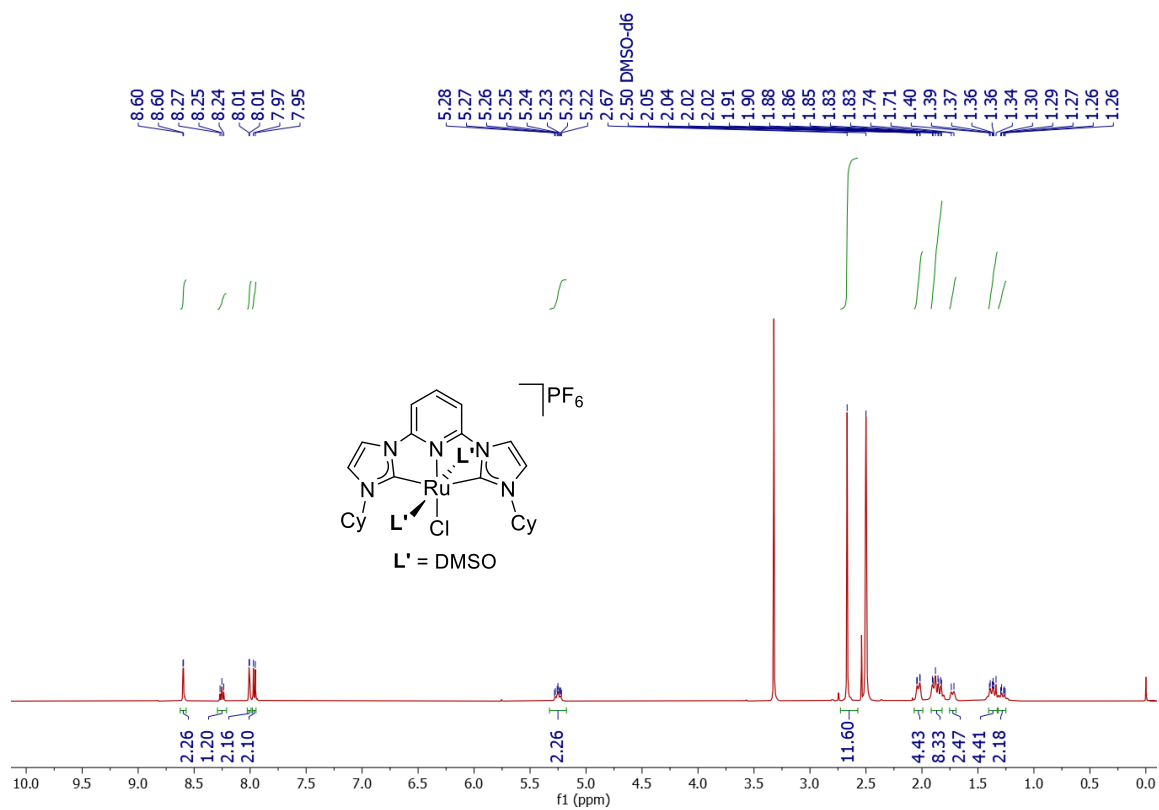

Figure S39. <sup>1</sup>H NMR spectrum of Complex 6c.

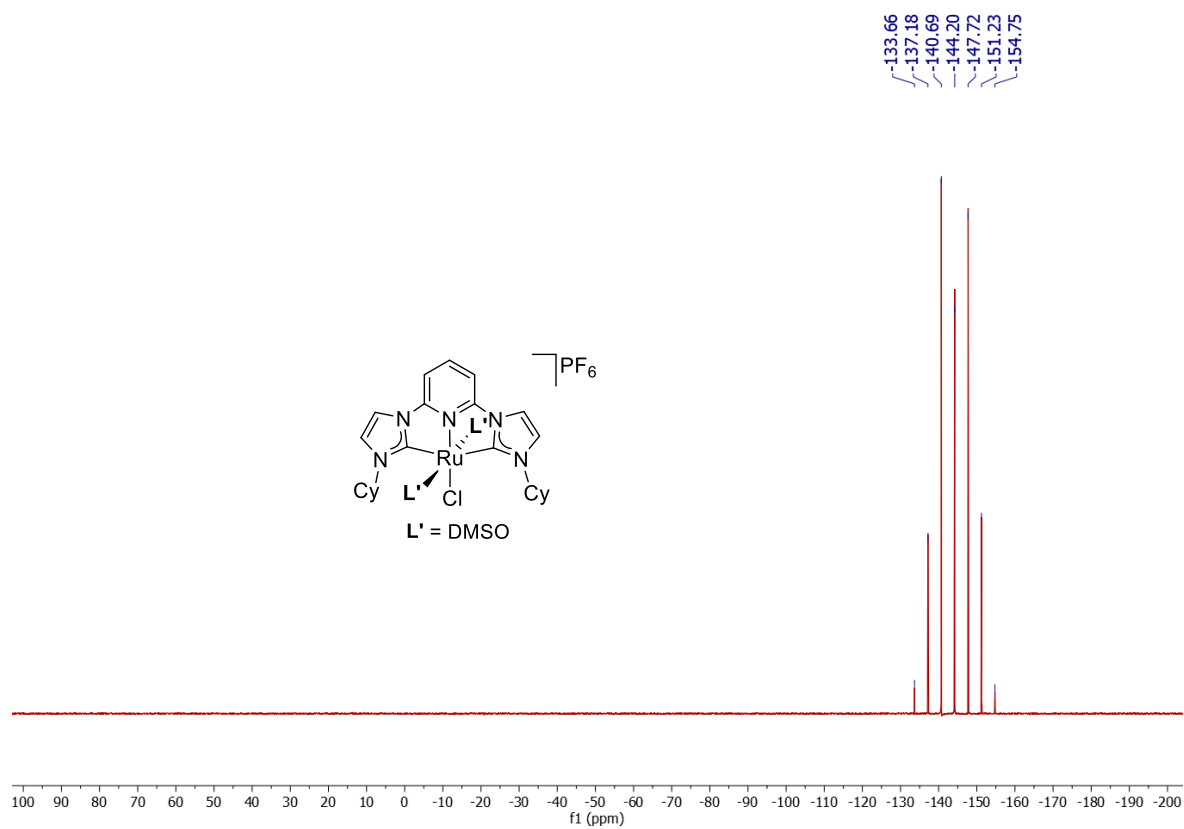

Figure S40. <sup>31</sup>P NMR spectrum of Complex 6c.



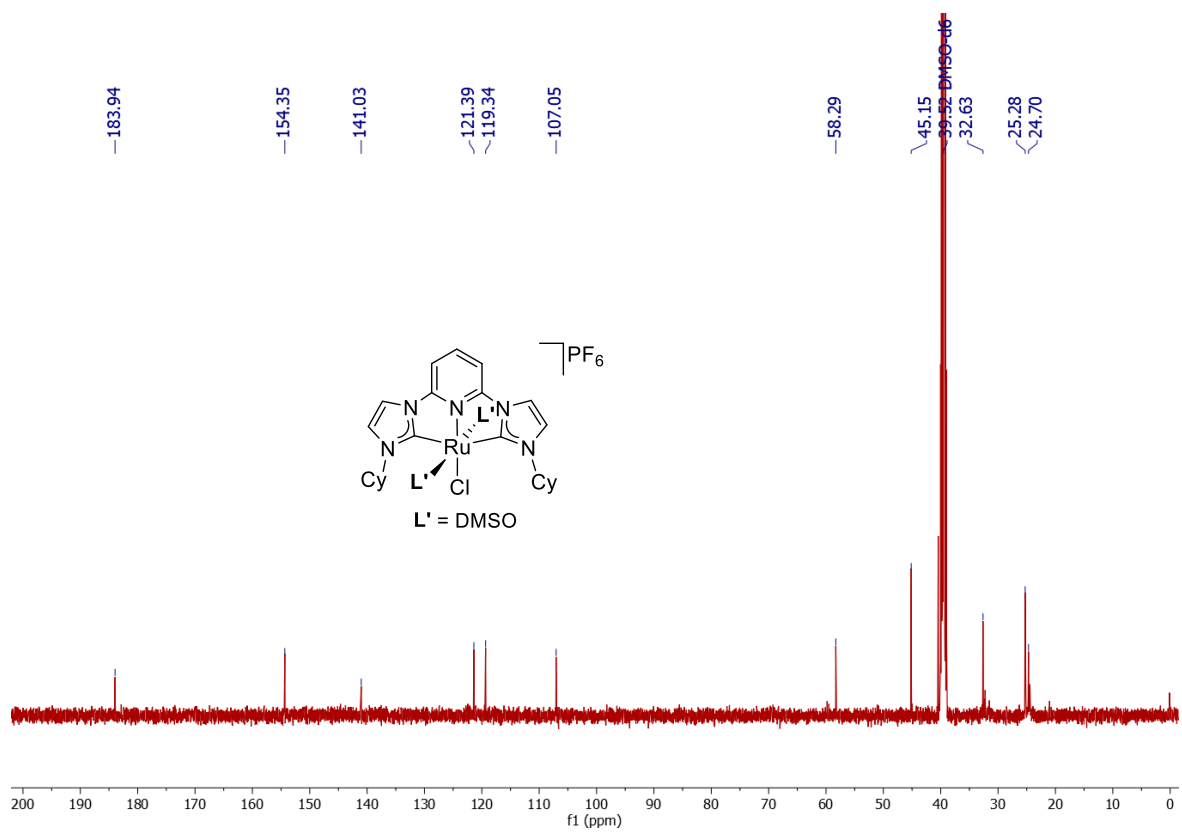

Figure S41.  $^{13}\text{C}$  NMR spectrum of Complex 6c.

## Display Report

### Analysis Info

Analysis Name D:\Data\May 2022\h chem AKS-RKS-178\_RA7\_01\_17626.d  
 Method 2. LCMS tune wide ACN.m  
 Sample Name h chem AKS-RKS-178  
 Comment

Acquisition Date 18-May-22 8:51:35 PM

Operator IIT Indore  
 Instrument micrOTOF-Q 228888.10348

### Acquisition Parameter

|             |            |                       |           |                  |           |
|-------------|------------|-----------------------|-----------|------------------|-----------|
| Source Type | ESI        | Ion Polarity          | Positive  | Set Nebulizer    | 2.0 Bar   |
| Focus       | Not active | Set Capillary         | 4500 V    | Set Dry Heater   | 250 °C    |
| Scan Begin  | 50 m/z     | Set End Plate Offset  | -500 V    | Set Dry Gas      | 7.0 l/min |
| Scan End    | 3000 m/z   | Set Collision Cell RF | 650.0 Vpp | Set Divert Valve | Waste     |

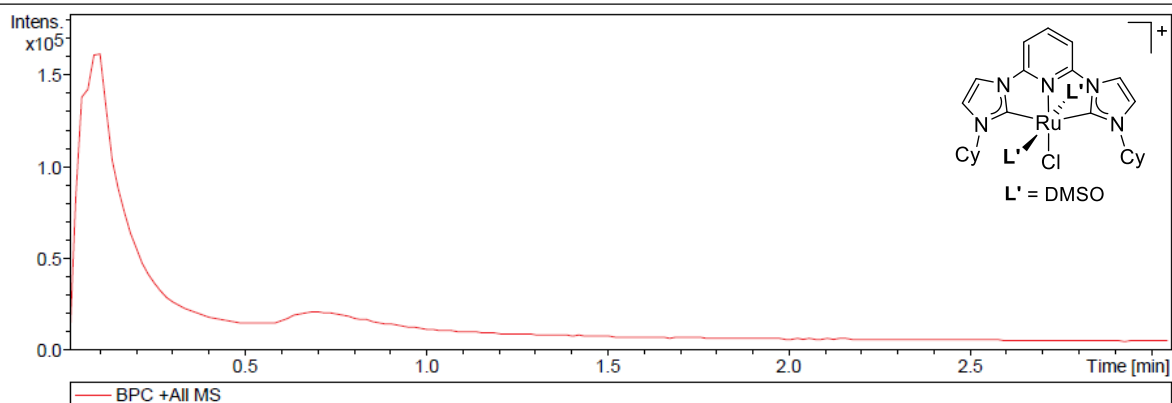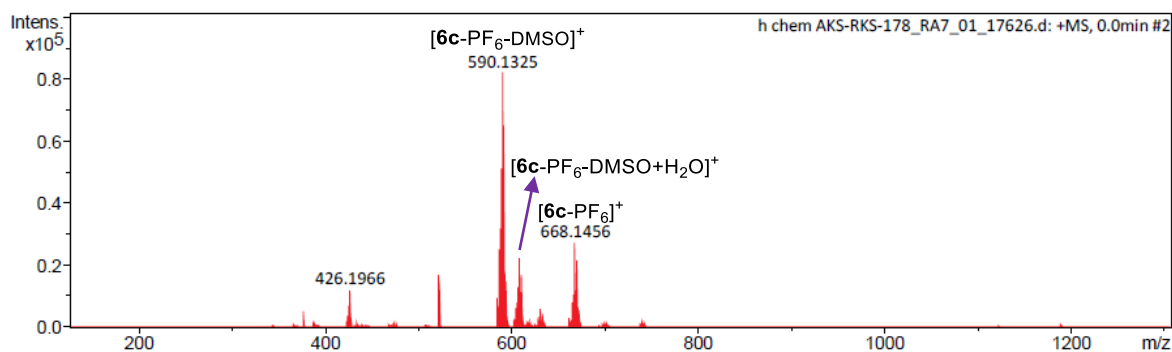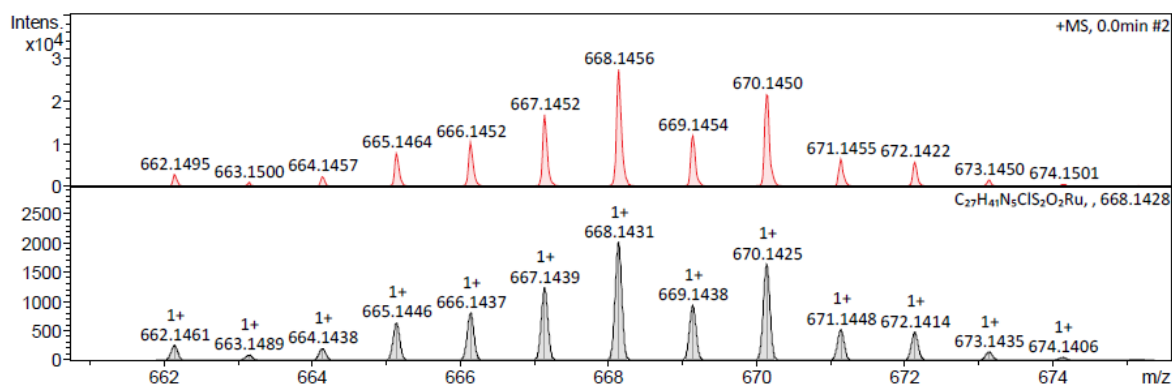

**Figure S42.** HRMS spectrum of complex **6c**.

# Display Report

## Analysis Info

Analysis Name D:\Data\October 2021\h chem AKS-DY-COD-*ipr*-a2\_RA1\_01\_10207.d  
Method 8. LCMS tune wide MeOH.m  
Sample Name h chem AKS-DY-COD-*ipr*-a2  
Comment

Acquisition Date 10/21/2021 4:53:21 PM  
Operator IIT Indore  
Instrument micrOTOF-Q 228888.10348

## Acquisition Parameter

|             |            |                       |           |                  |           |
|-------------|------------|-----------------------|-----------|------------------|-----------|
| Source Type | ESI        | Ion Polarity          | Positive  | Set Nebulizer    | 2.0 Bar   |
| Focus       | Not active | Set Capillary         | 4500 V    | Set Dry Heater   | 250 °C    |
| Scan Begin  | 50 m/z     | Set End Plate Offset  | -500 V    | Set Dry Gas      | 7.0 l/min |
| Scan End    | 3000 m/z   | Set Collision Cell RF | 650.0 Vpp | Set Divert Valve | Waste     |

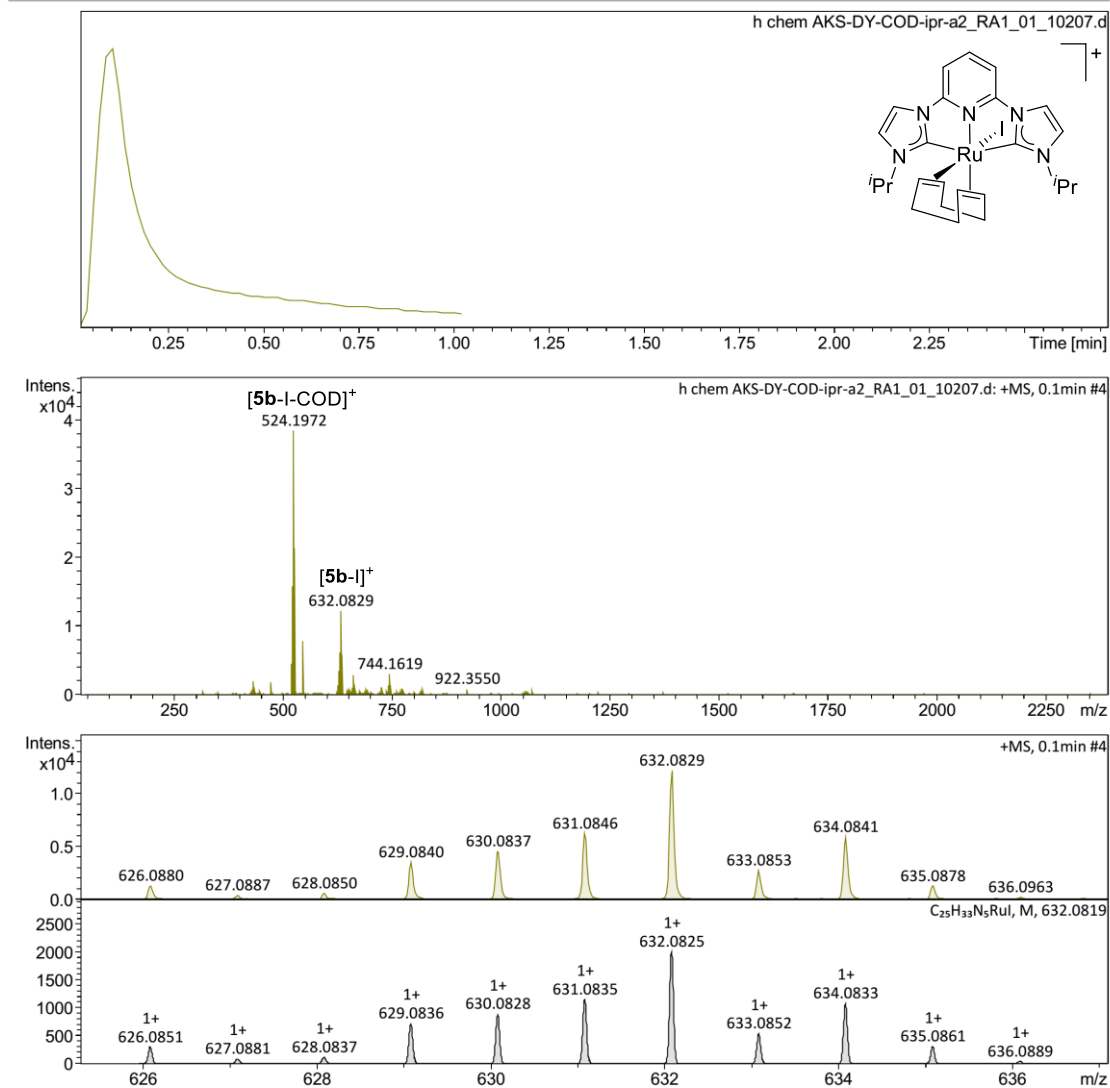

Figure S43. HRMS spectrogram of Complex 5b.

## Mechanism for transfer hydrogenation reaction

A plausible mechanism for transfer hydrogenation is shown, with complex **1c** as the catalyst precursor and **2c** as the Ru-hydride intermediate. The detailed mechanistic investigation for TH reaction with the *N*-methyl complex was previously reported by our group.<sup>1</sup> The ruthenium alkoxide species **A** is produced, when complex **1c** is treated with NaO<sup>*i*</sup>Pr. The Ru-H intermediate **2c'** is formed from **A** via  $\beta$ -H elimination by releasing one molecule of acetone, or by dissociation of a PPh<sub>3</sub> ligand if starting from **2c**. The addition of cyclohexanone to the intermediate **2c'** produces another ruthenium alkoxide intermediate **B**, which releases the hydrogenated product upon protonation from <sup>*i*</sup>PrOH resulting in the formation of **A** again.

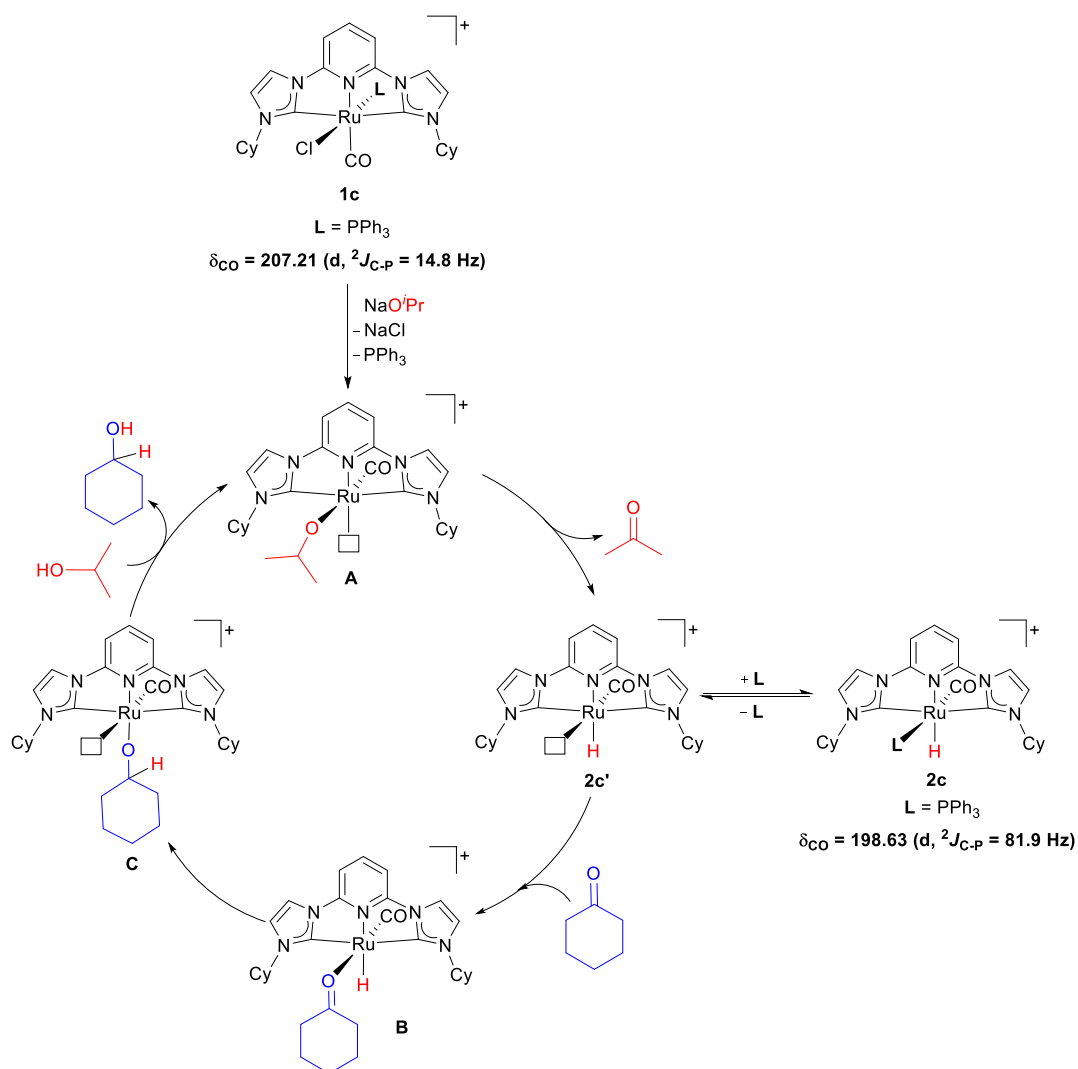

**Figure S44.** Plausible mechanism for transfer hydrogenation reaction by complex **1c** with key intermediates **2c**.

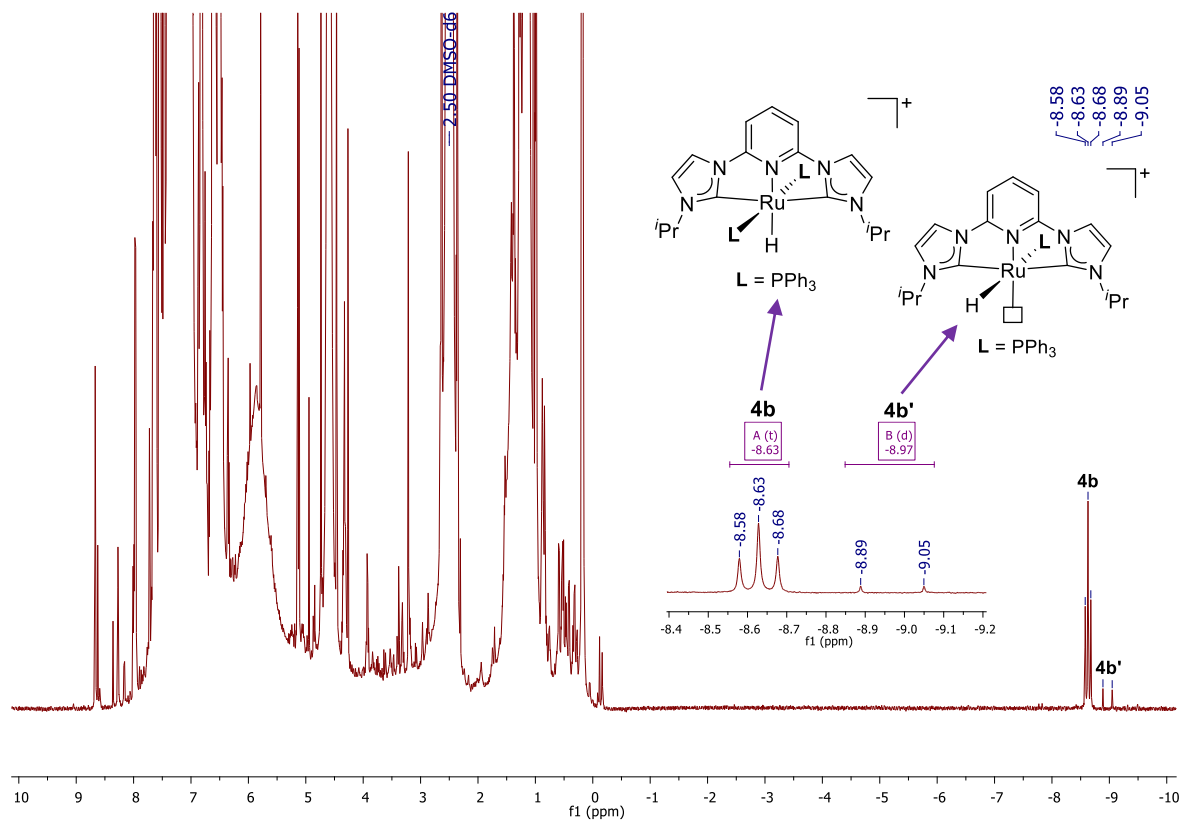

**Figure S45.**  $^1\text{H}$  NMR experiment in  $\text{DMSO-d}_6$  to observe the generation of ruthenium hydride intermediate from complex **3b** under catalytic reaction conditions.

## Display Report

### Analysis Info

Analysis Name D:\Data\June 2022\m chem AKS-RKS-C-53\_RC1\_01\_18415.d  
 Method 8. LCMS tune wide MeOH.m  
 Sample Name m chem AKS-RKS-C-53  
 Comment

Acquisition Date 15-Jun-22 4:26:29 PM  
 Operator IIT Indore  
 Instrument micrOTOF-Q 228888.10348

### Acquisition Parameter

|             |            |                       |           |                  |           |
|-------------|------------|-----------------------|-----------|------------------|-----------|
| Source Type | ESI        | Ion Polarity          | Positive  | Set Nebulizer    | 2.0 Bar   |
| Focus       | Not active | Set Capillary         | 4500 V    | Set Dry Heater   | 250 °C    |
| Scan Begin  | 50 m/z     | Set End Plate Offset  | -500 V    | Set Dry Gas      | 7.0 l/min |
| Scan End    | 3000 m/z   | Set Collision Cell RF | 650.0 Vpp | Set Divert Valve | Waste     |

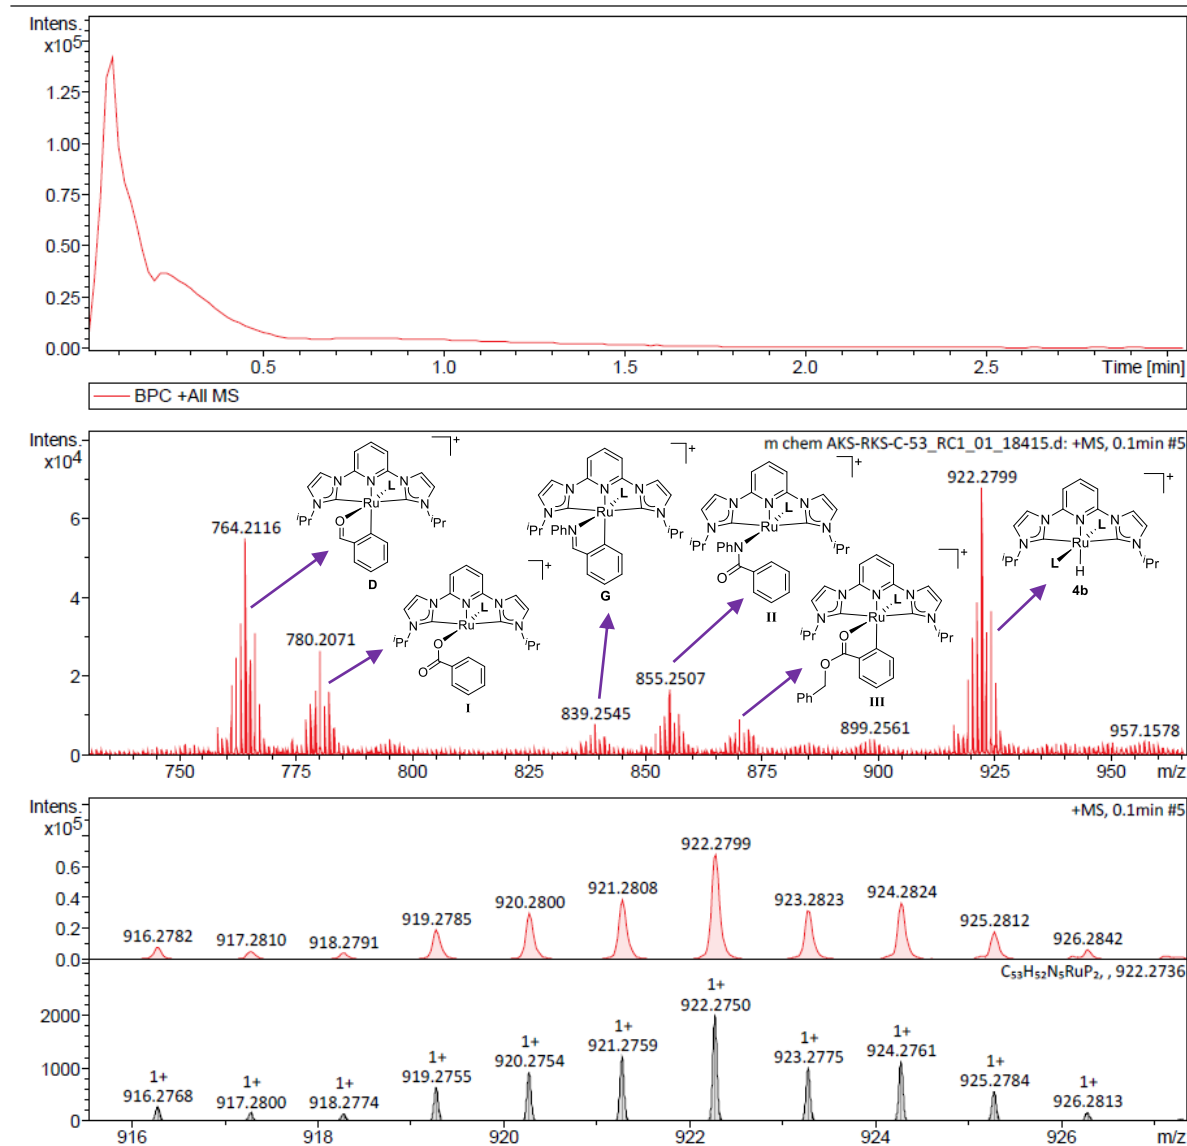

**Figure S46.** LCMS spectrogram of catalytic reaction mixture (**L** = PPh<sub>3</sub>).

## Display Report

|                      |                                                                                                  |                  |                     |                         |
|----------------------|--------------------------------------------------------------------------------------------------|------------------|---------------------|-------------------------|
| <b>Analysis Info</b> |                                                                                                  | Acquisition Date | 22-06-2022 16:24:20 |                         |
| Analysis Name        | C:\Users\Rahul Kumar Singh\Desktop\NMR and Mass\Mass data\m chem aks-rks-c-110-3h_RA3_01_18656.d |                  |                     |                         |
| Method               | 8. LCMS tune wide MeOH.m                                                                         |                  | Operator            | IIT Indore              |
| Sample Name          | m chem aks-rks-c-110-3h                                                                          |                  | Instrument          | micrOTOF-Q 228888.10348 |
| Comment              |                                                                                                  |                  |                     |                         |

### Acquisition Parameter

|             |            |                       |           |                  |           |
|-------------|------------|-----------------------|-----------|------------------|-----------|
| Source Type | ESI        | Ion Polarity          | Positive  | Set Nebulizer    | 2.0 Bar   |
| Focus       | Not active | Set Capillary         | 4500 V    | Set Dry Heater   | 250 °C    |
| Scan Begin  | 50 m/z     | Set End Plate Offset  | -500 V    | Set Dry Gas      | 7.0 l/min |
| Scan End    | 3000 m/z   | Set Collision Cell RF | 650.0 Vpp | Set Divert Valve | Waste     |

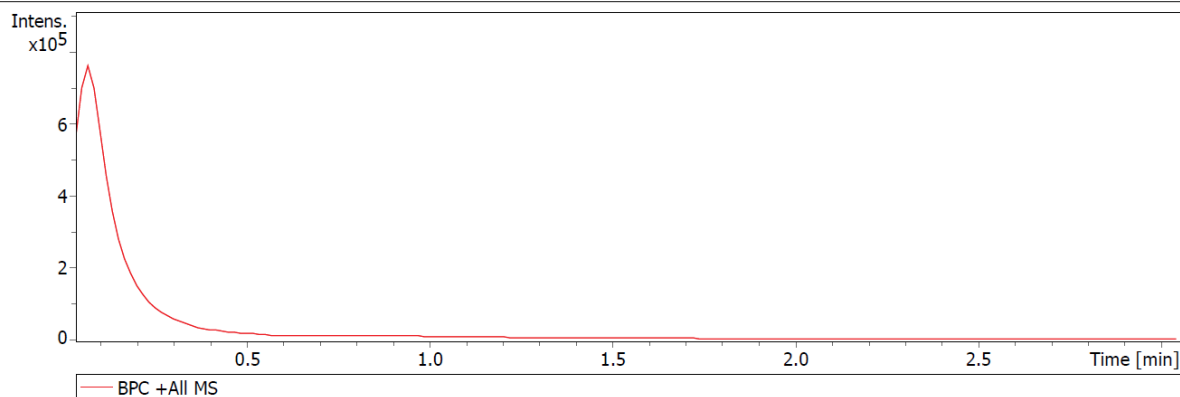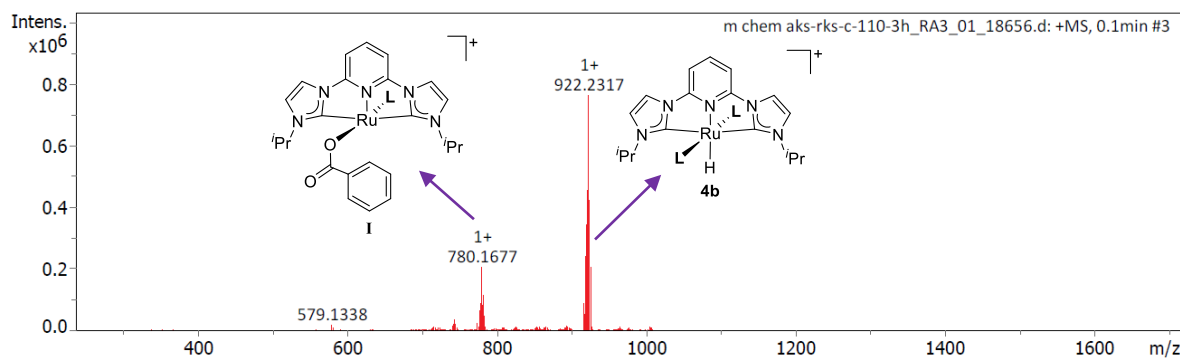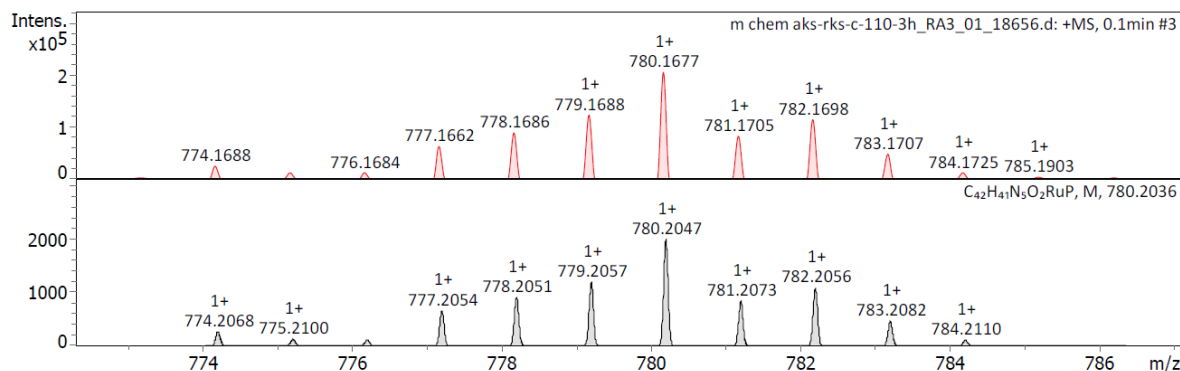

**Figure S47.** LCMS spectrogram of catalytic reaction mixture with benzaldehyde and catalyst **4b** formed intermediate **I** (**L** = PPh<sub>3</sub>).

Formation of other intermediates **I**, **II**, and **III** appeared during the catalytic reactions (Figure S46). Intermediate **I** also appeared in LCMS during the reaction of benzaldehyde with Ru hydride catalyst **4b** (Figure S47). This information suggests that the *ortho* C-H activation of benzaldehyde takes place and generated intermediate **D**, which further reacted with moisture (while recording mass data) and appeared as intermediate **I** (Figure S47).

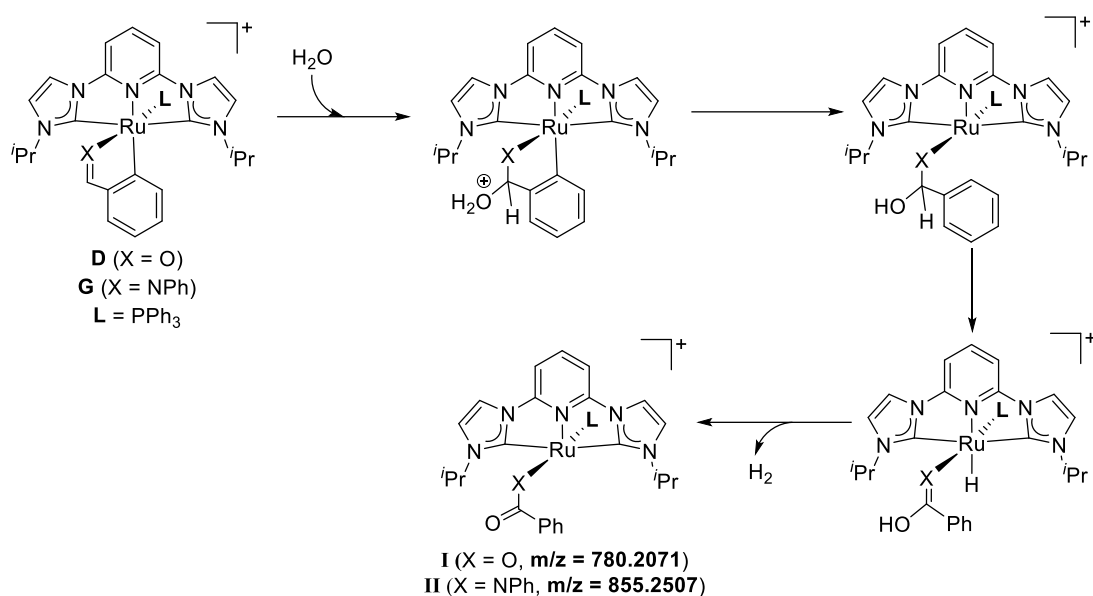

**Figure S48.** Plausible mechanism for the formation of intermediates **I** and **II** in catalytic reaction mixture by complex **3b**.

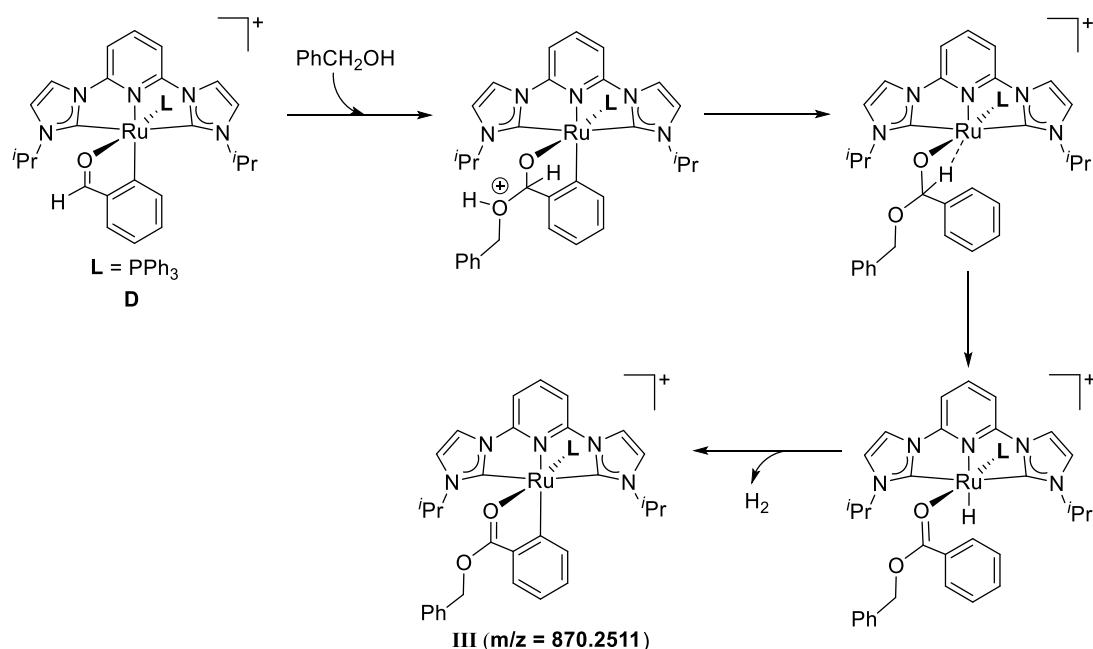

**Figure S49.** Plausible mechanism for the formation of intermediate **III** in catalytic reaction mixture by complex **3b**.



### Determination of % GC yield by gas chromatography

GC Samples were analysed in Shimadzu QP2010 Ultra gas chromatograph. Yields of the product were determined using *n*-decane as an internal standard. Samples were prepared by filtering the reaction mixture through a celite pad with chloroform and further dilution with methanol solution. The additional peaks in some GC-MS traces are of PPh<sub>3</sub> and sometimes OPPh<sub>3</sub> due to aerial oxidation in the GC sample. The poor signal separation, only in case of transfer hydrogenation of cyclohexanone, is due to very close retention time of cyclohexanone and cyclohexanol. For uniformity, we have followed the automated integration by the GC-MS software of our instrument. The reactants and products relative response factors (RF) were calculated using *n*-decane as the internal standard. *n*-Decane was added to the reaction mixture prior to start of catalysis. The following equations are used to calculate the % GC yields.<sup>4</sup>

Response factors were calculated using the following equation:

$$\text{RF} = \frac{\text{Area percentage of internal standard} \times \text{Moles of analyte}}{\text{Area percentage of analyte} \times \text{Moles of internal standard}}$$

Moles of remaining reactants and products were calculated using the following equation:

$$\text{Moles of analyte} = \frac{\text{RF} \times \text{Moles of internal standard} \times \text{Area percentage of analyte}}{\text{Area percentage of internal standard}}$$

The products of catalysis experiments (TH and AAD) are characterized by <sup>1</sup>H and <sup>13</sup>C NMR as well as GC-MS. ADC catalysis experiments are analyzed with GC-MS only as the imine products are prone to hydrolysis during column chromatography.

GC-MS spectra of Transfer hydrogenation of cyclohexanone products for table 1.

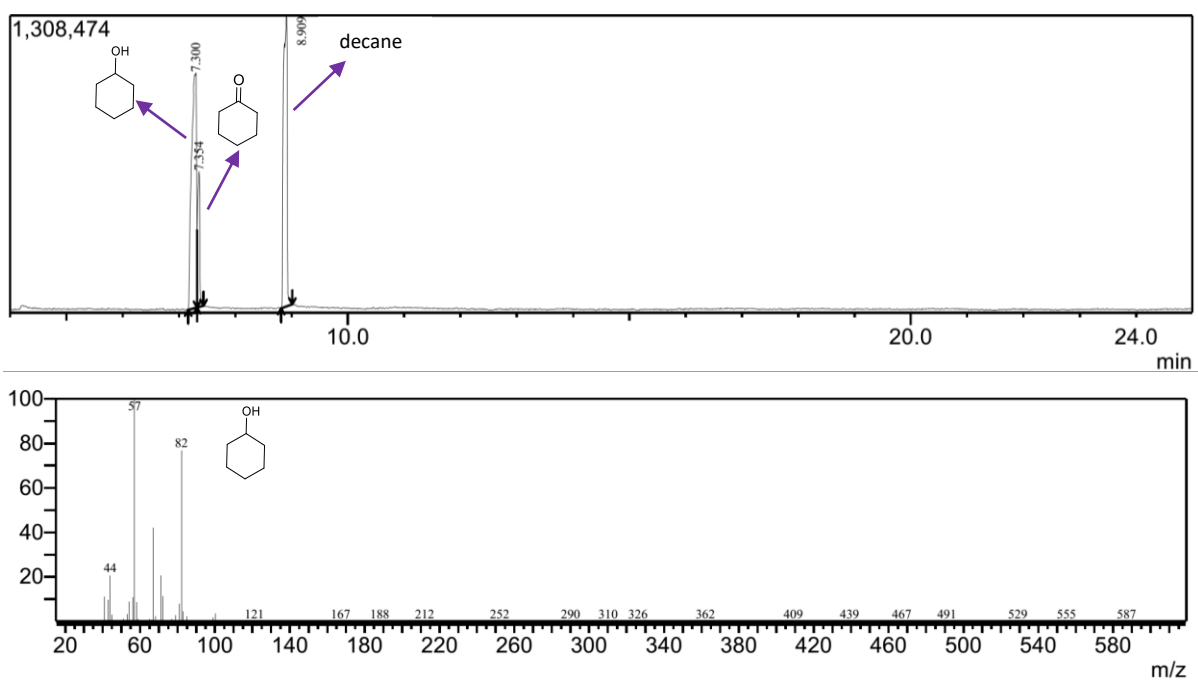

Figure S50. GC-MS spectrum for entry 5 of table 1.

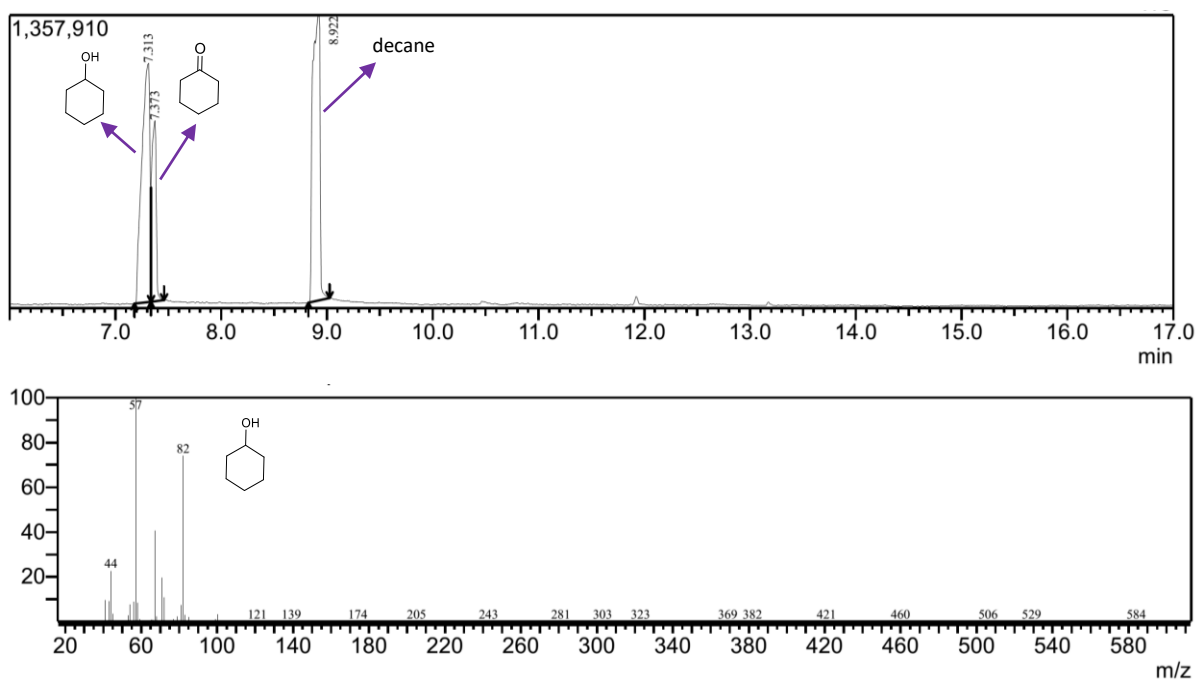

Figure S51. GC-MS spectrum for entry 6 of table 1.

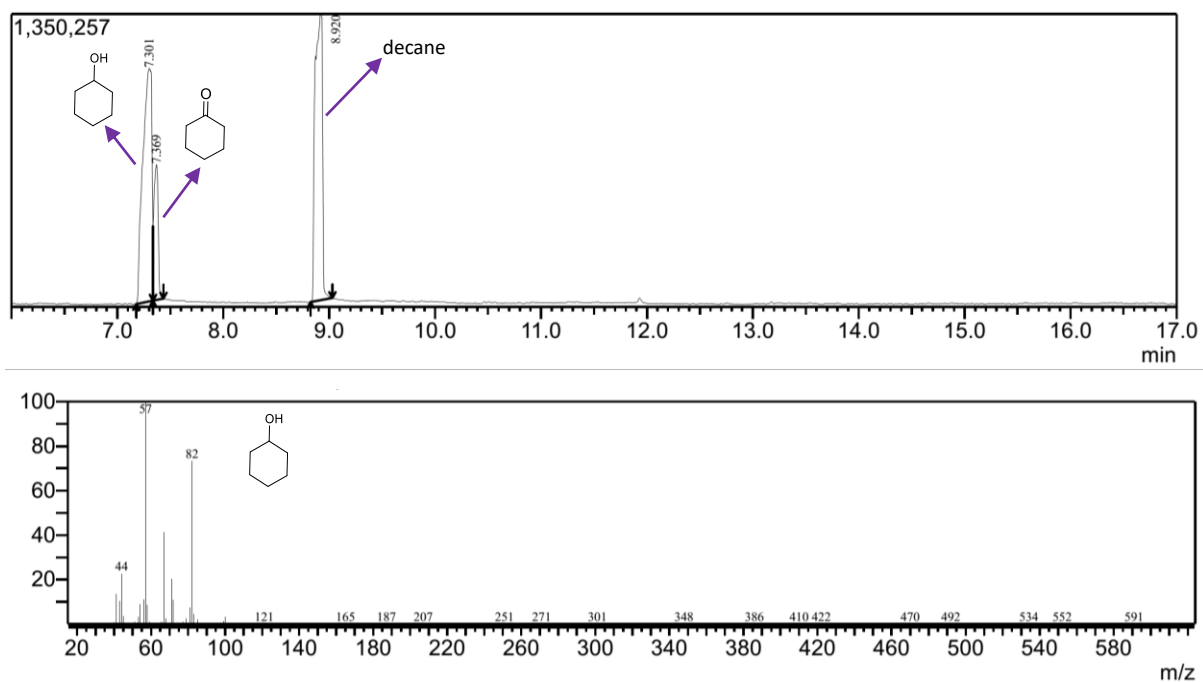

Figure S52. GC-MS spectrum for entry 7 of table 1.

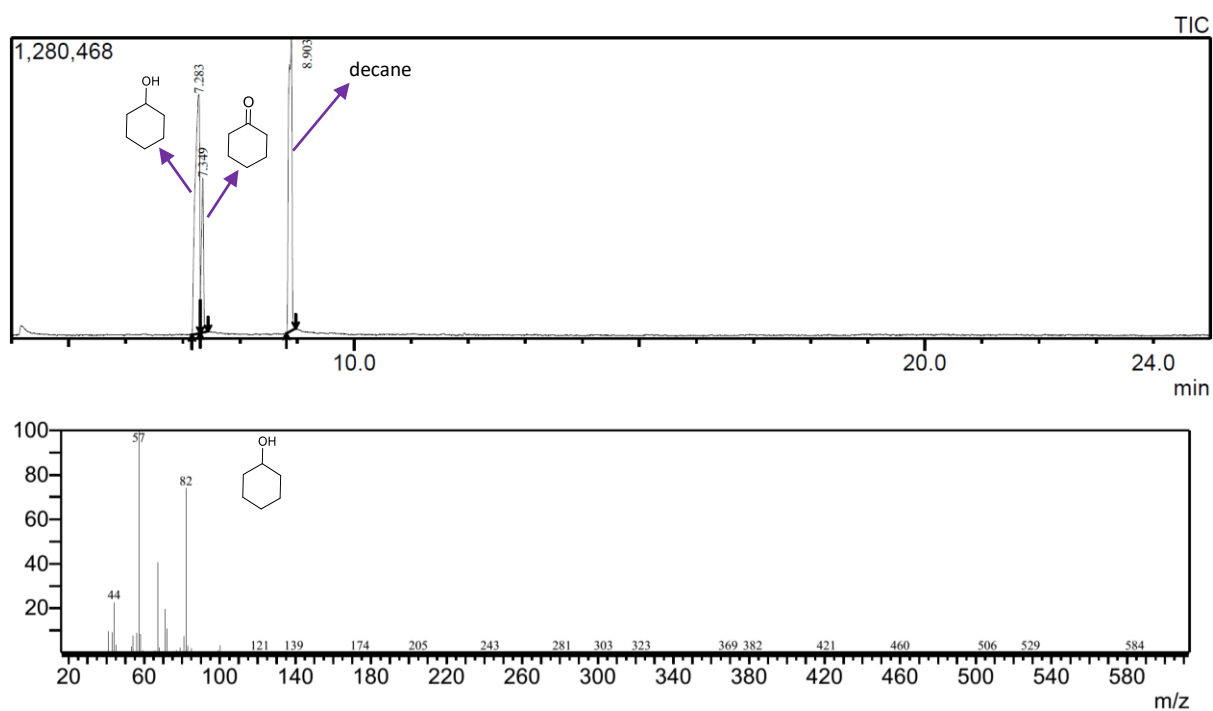

Figure S53. GC-MS spectrum for entry 8 of table 1.

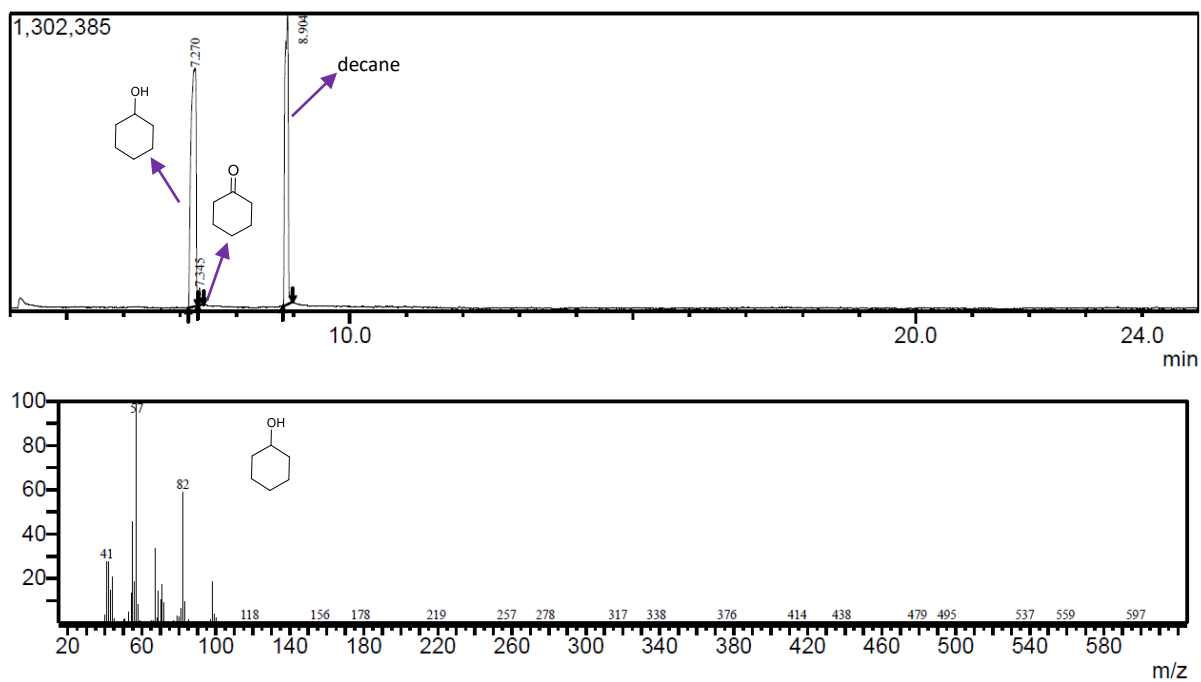

Figure S54. GC-MS spectrum for entry 9 of table 1.

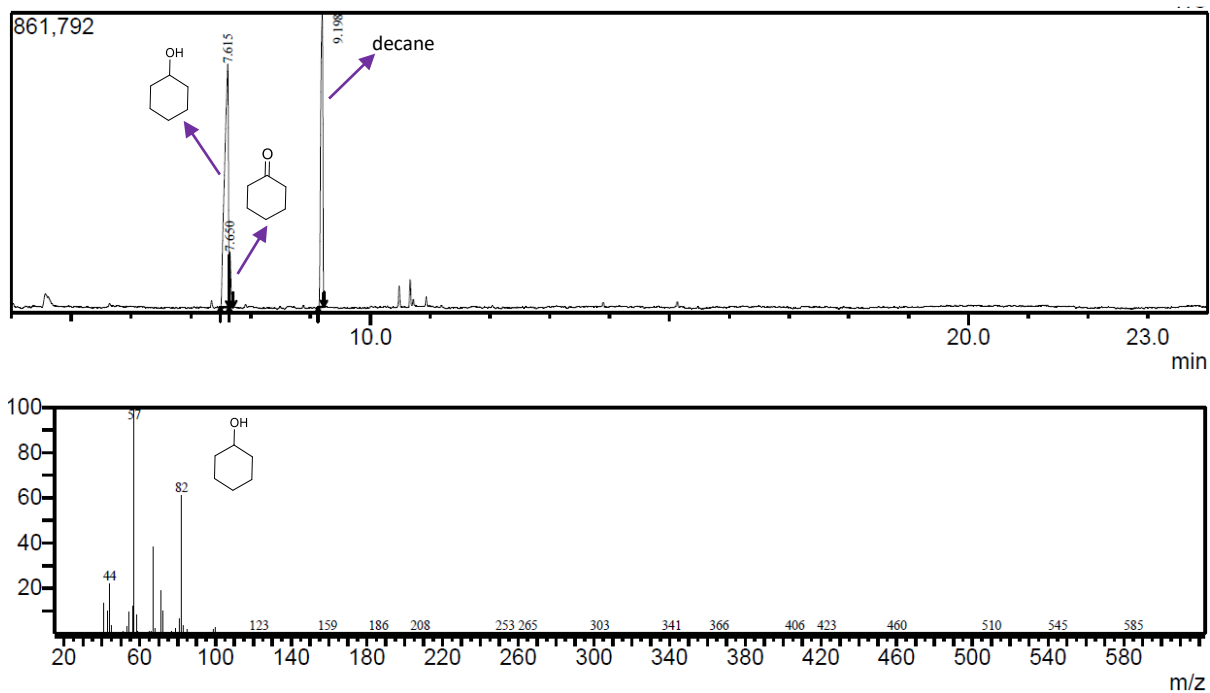

Figure S55. GC-MS spectrum for entry 10 of table 1.

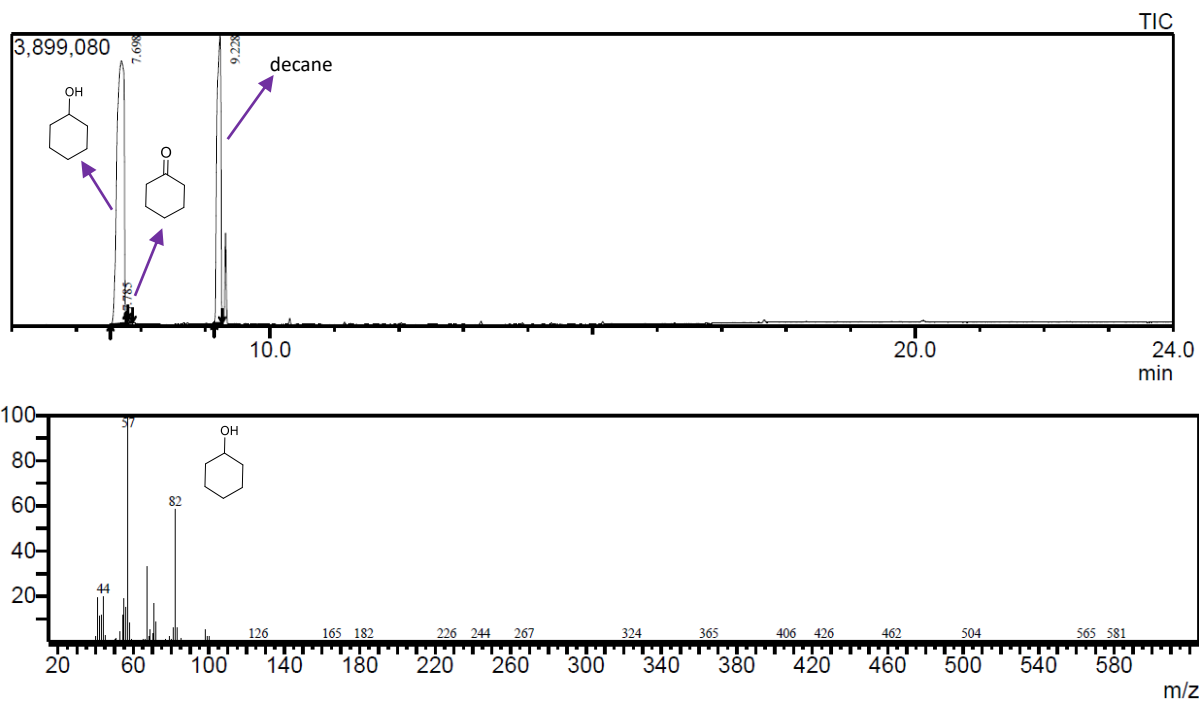

Figure S56. GC-MS spectrum for entry 11 of table 1.

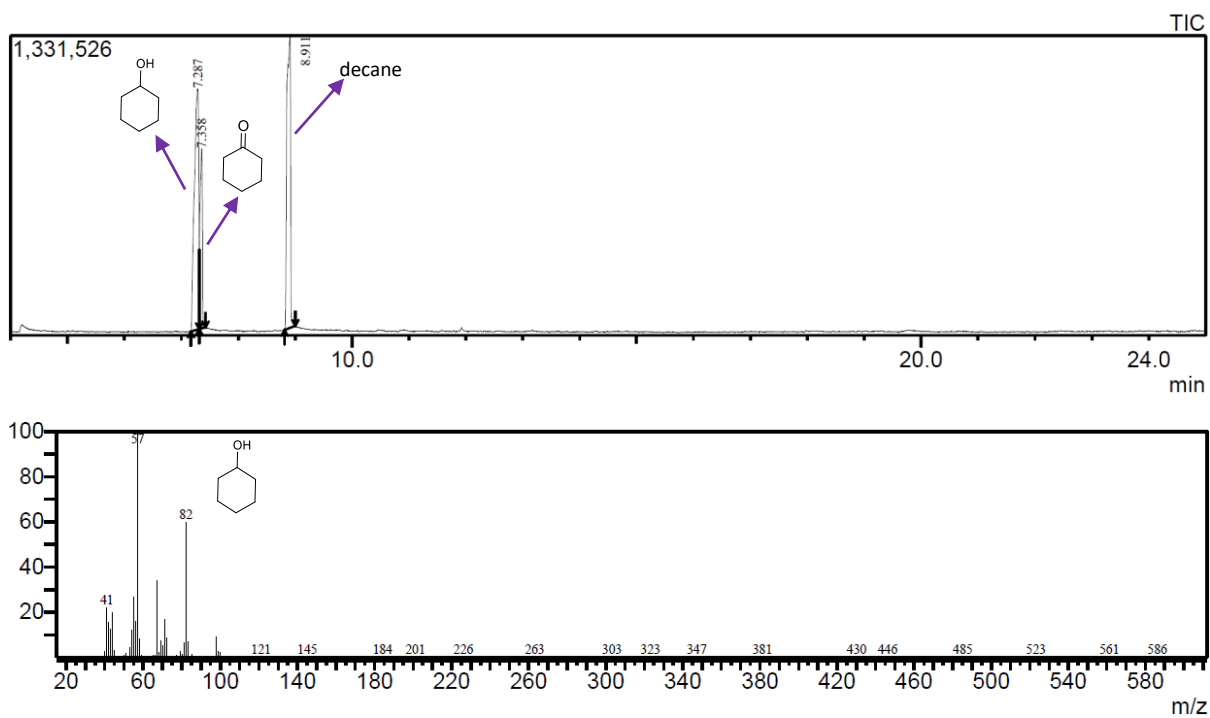

Figure S57. GC-MS spectrum for entry 12 of table 1.

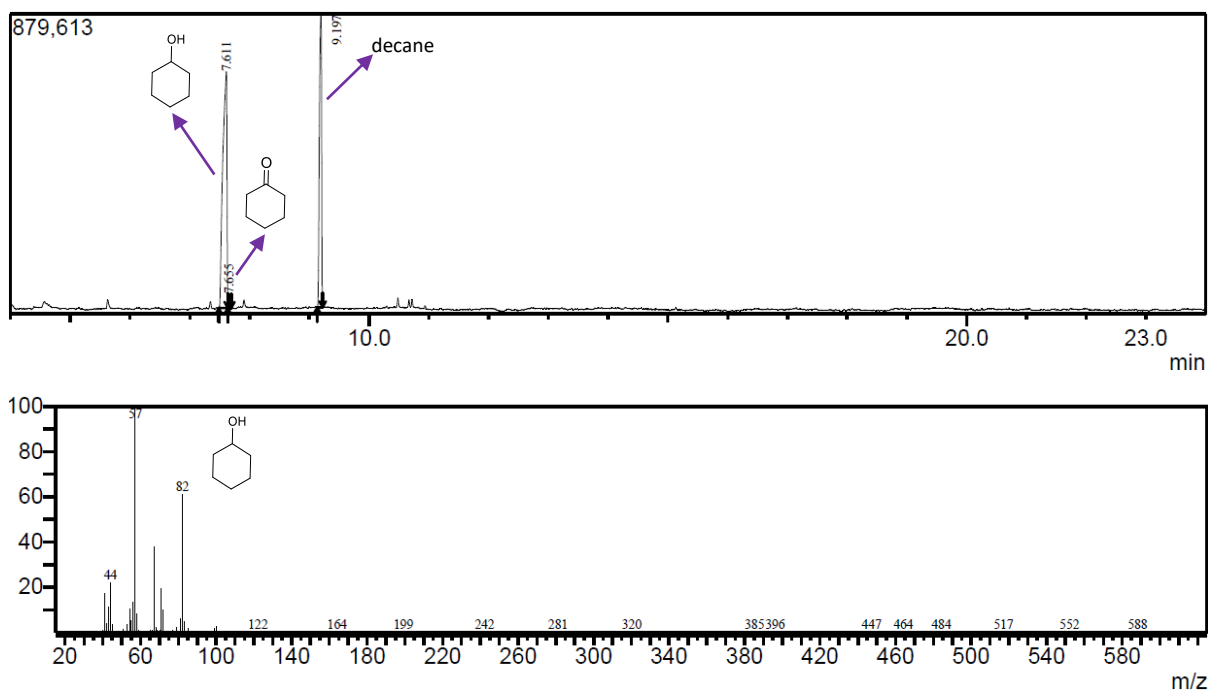

Figure S58. GC-MS spectrum for entry 13 of table 1.

**GC-MS spectra of Acceptorless dehydrogenation of benzyl alcohol products for table 2.**

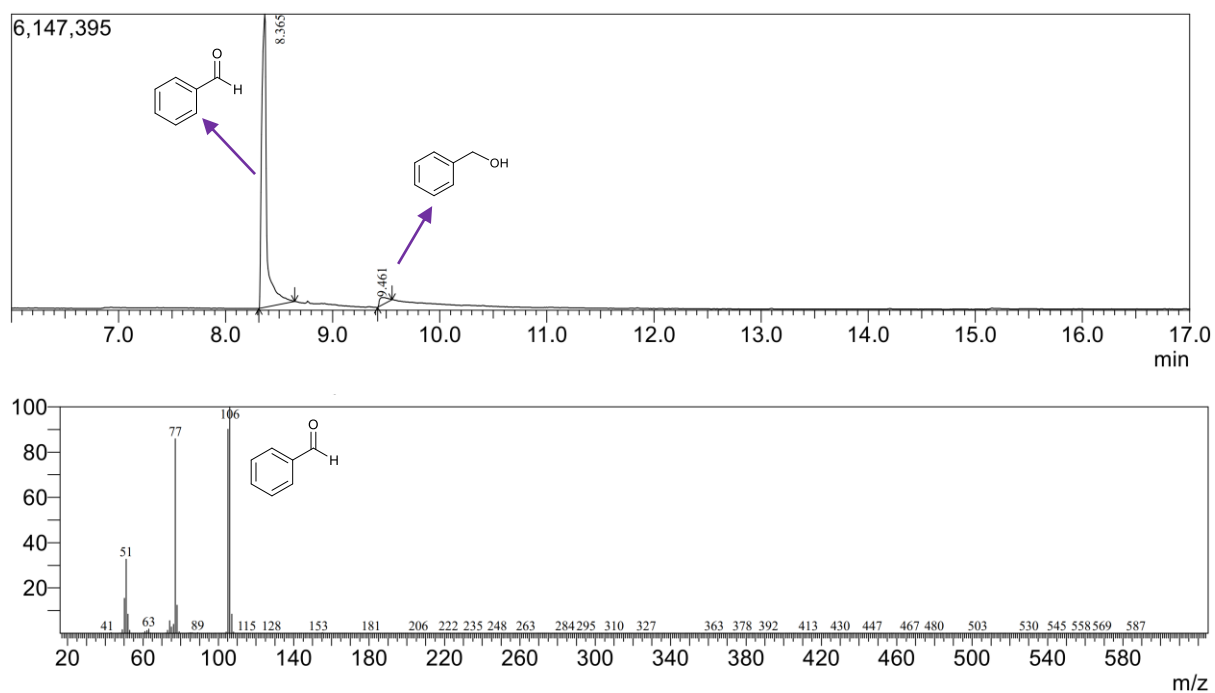

Figure S59. GC-MS spectrum for entry 6 of table 2.

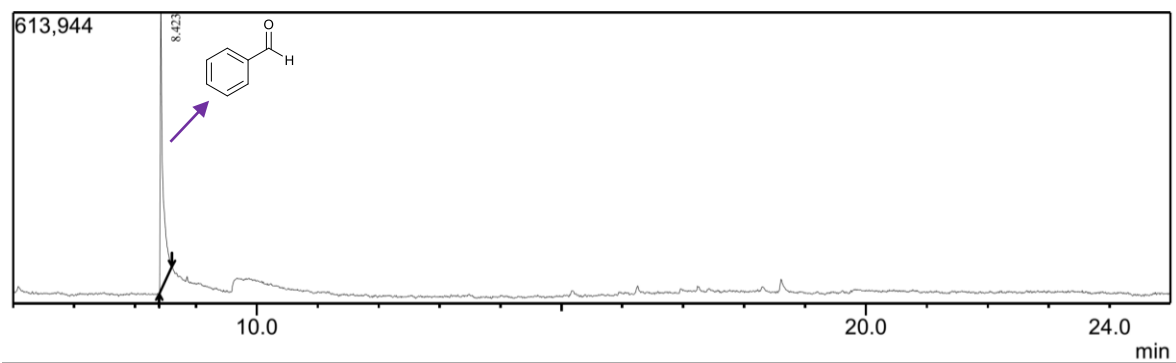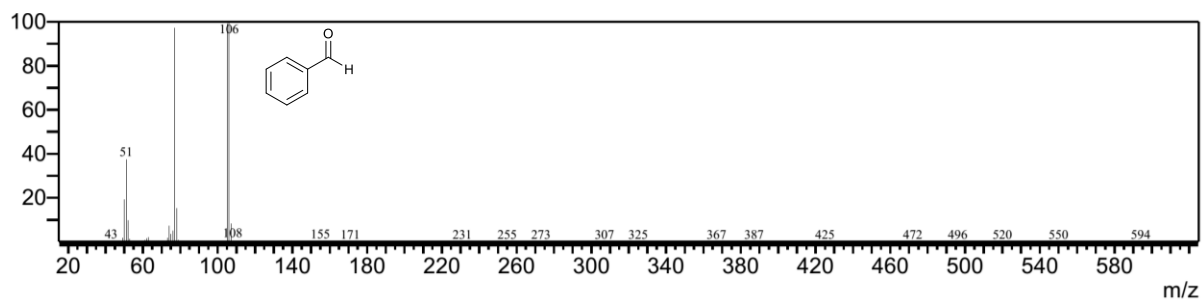

**Figure S60.** GC-MS spectrum for entry 7 of table 2.

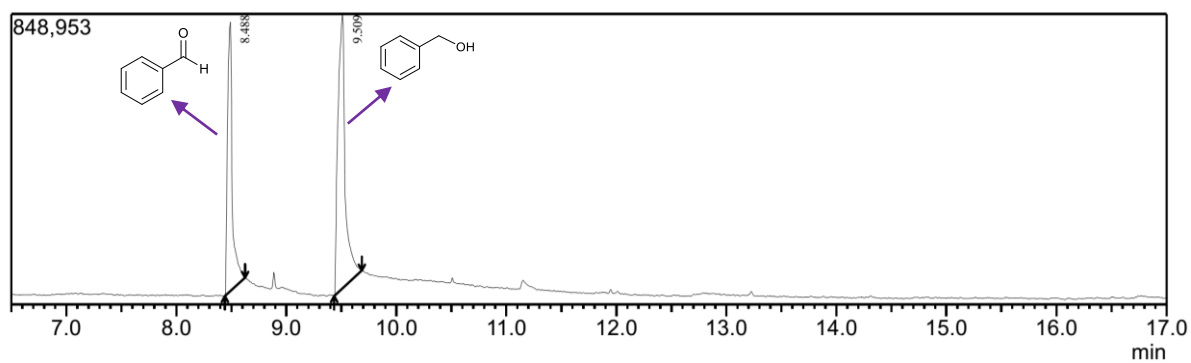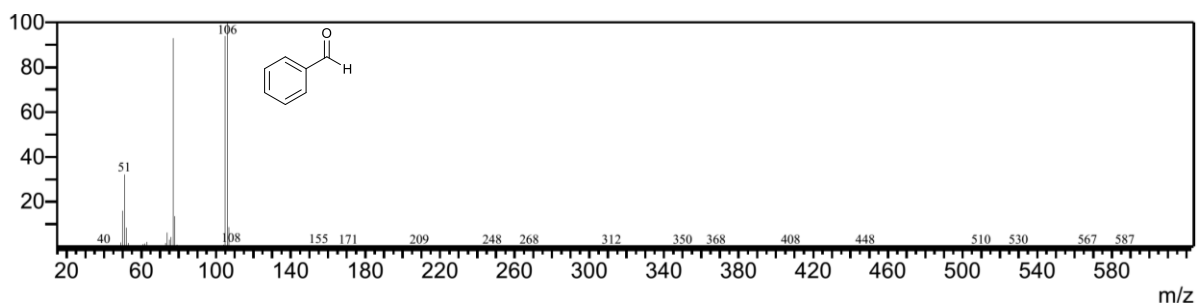

**Figure S61.** GC-MS spectrum for entry 8 of table 2.

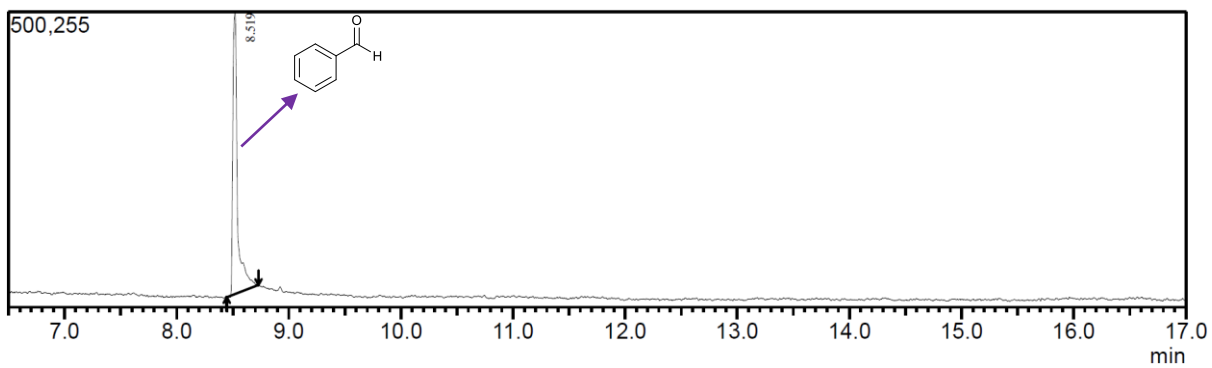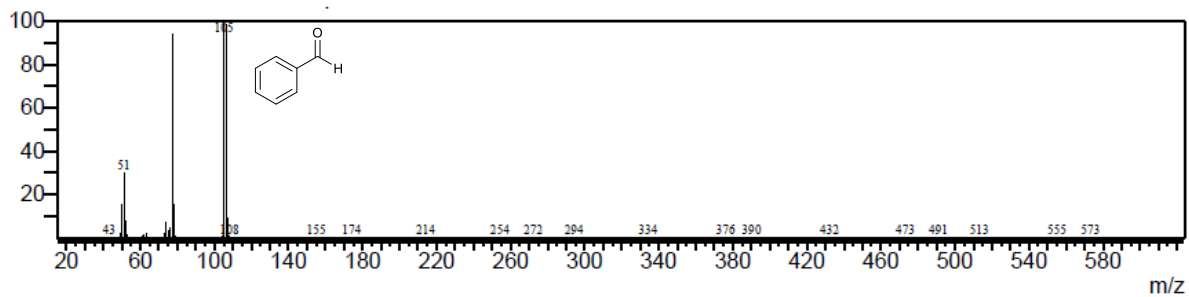

Figure S62. GC-MS spectrum for entry 9 of table 2.

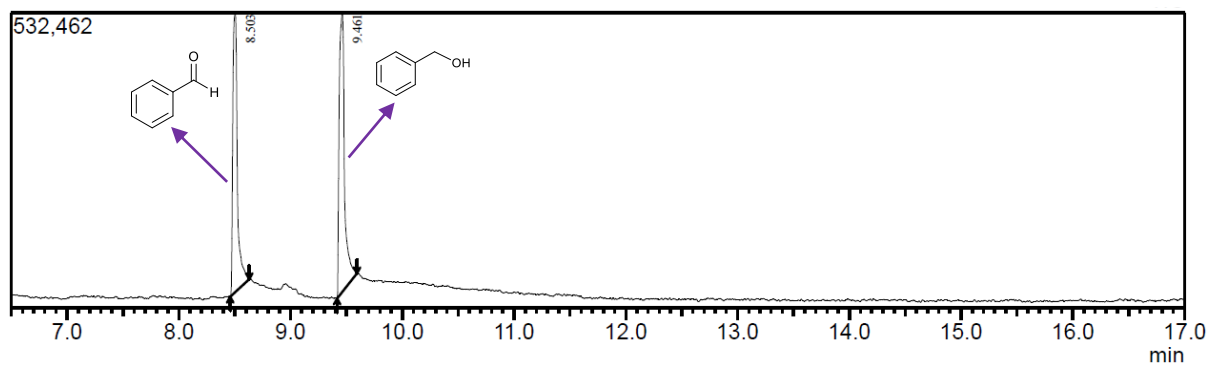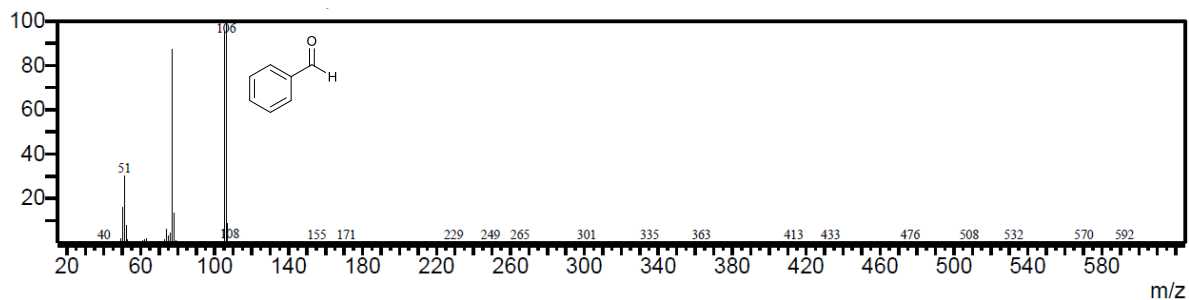

Figure S63. GC-MS spectrum for entry 10 of table 2.



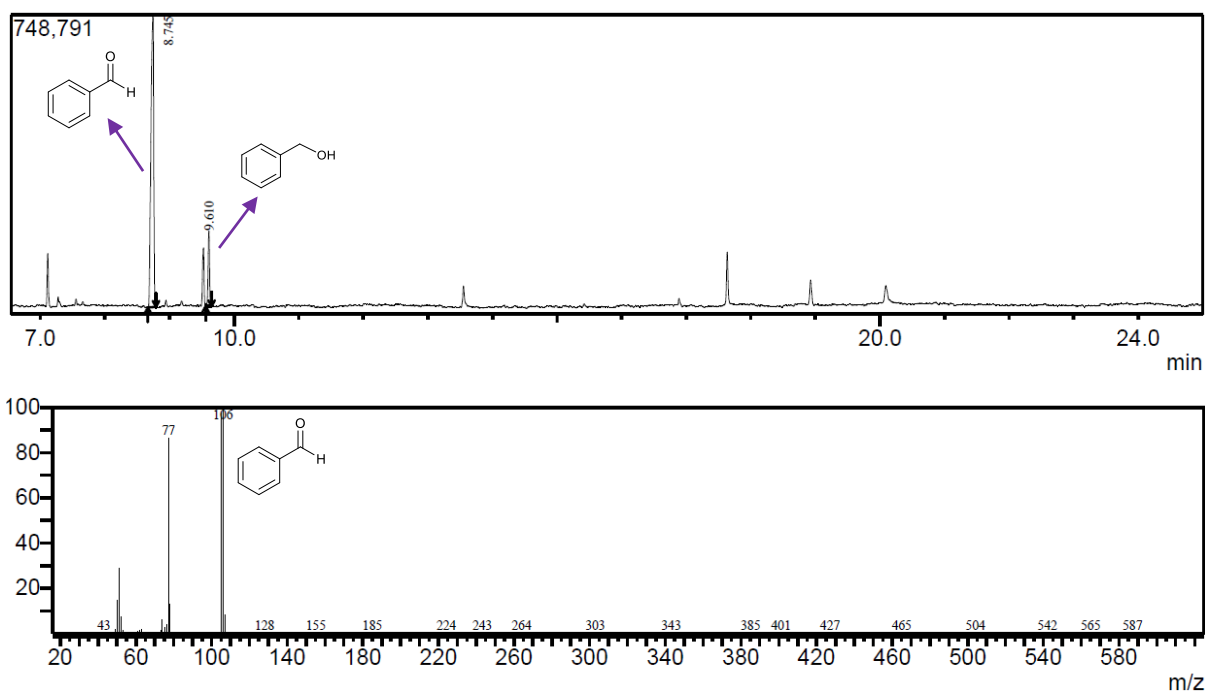

**Figure S64.** GC-MS spectrum for entry 11 of table 2.

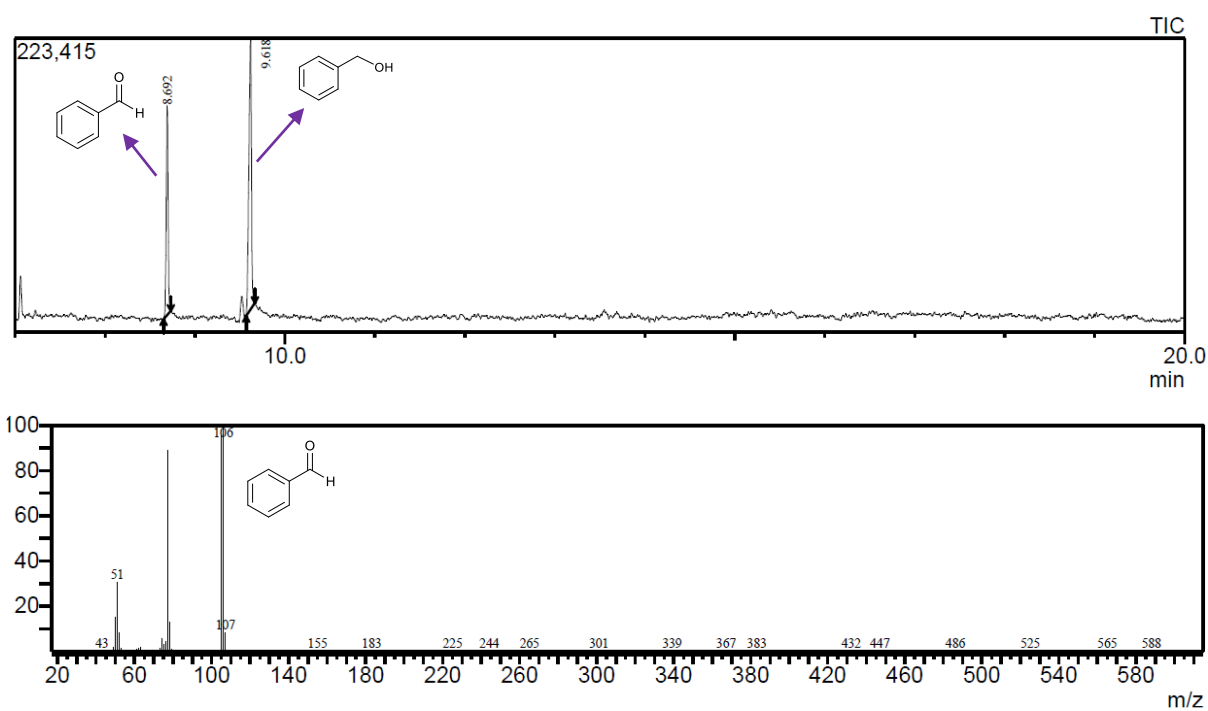

**Figure S65.** GC-MS spectrum for entry 12 of table 2.

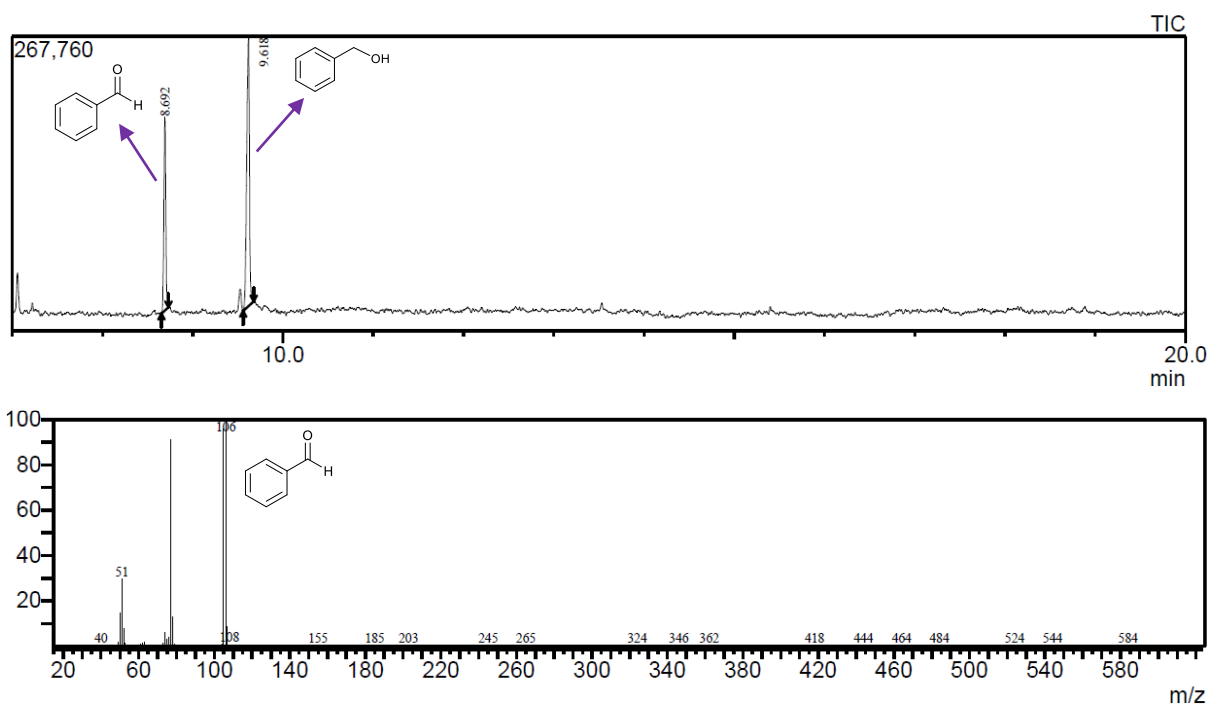

Figure S66. GC-MS spectrum for entry 13 of table 2.

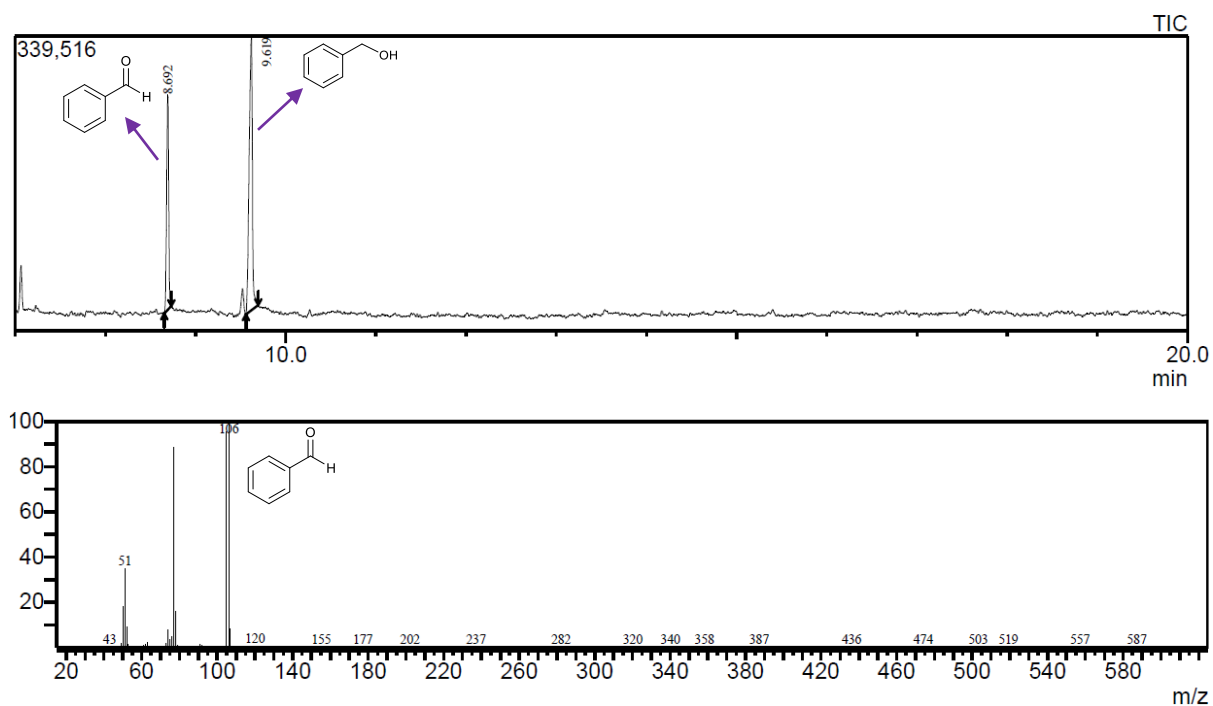

Figure S67. GC-MS spectrum for entry 14 of table 2.

**GC-MS spectra of Acceptorless dehydrogenative coupling of aniline and benzyl alcohol products for table 3.**

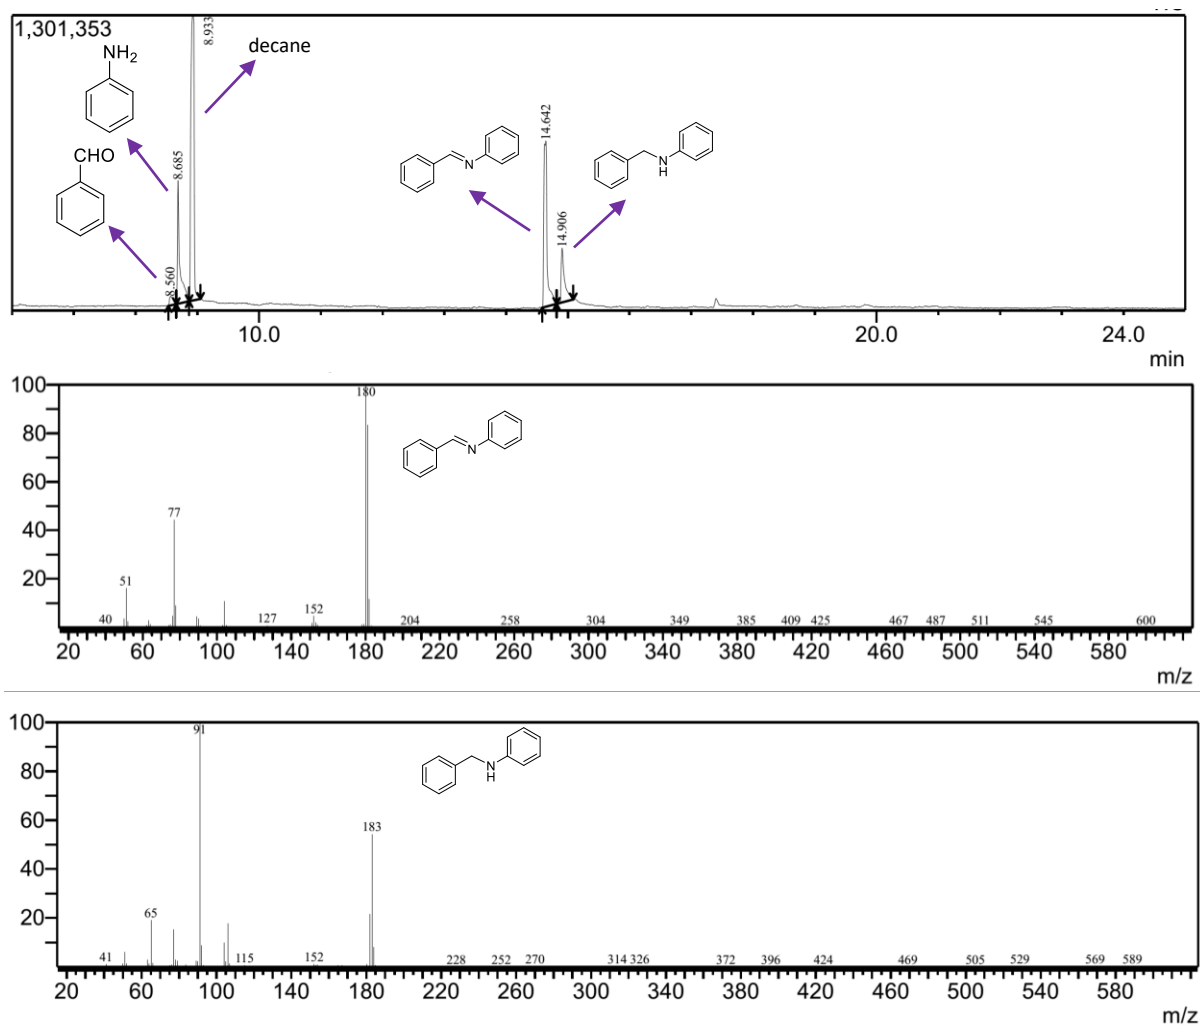

**Figure S68.** GC-MS spectrum for entry 1 of table 3.

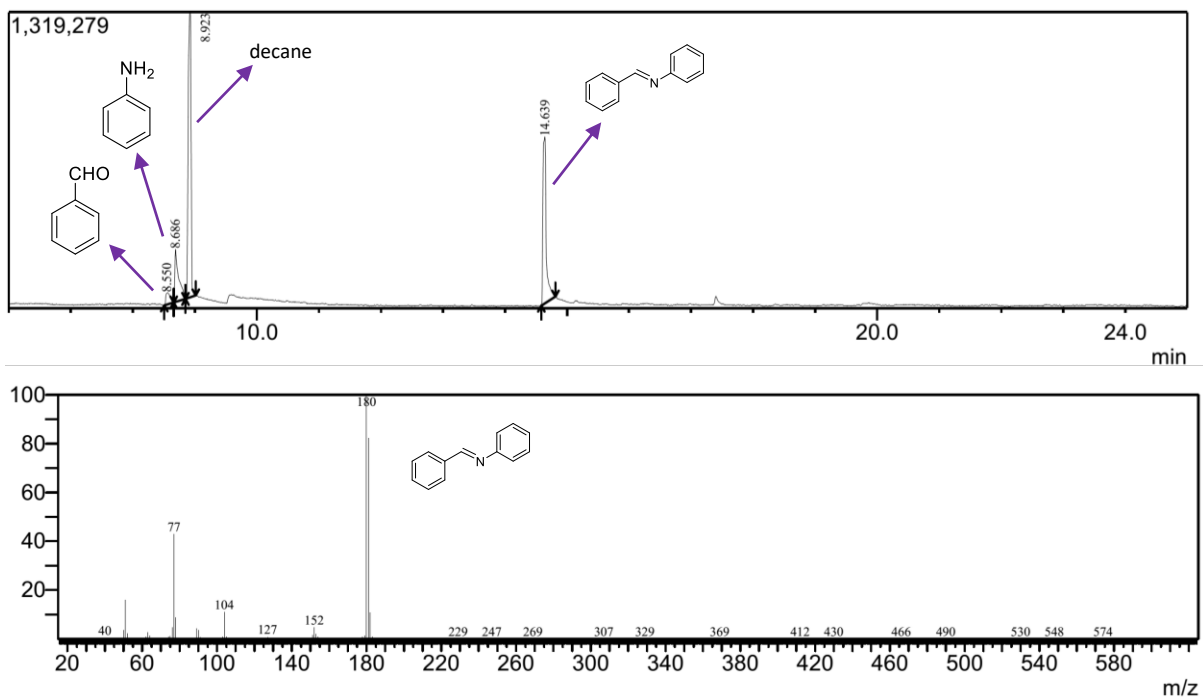

Figure S69. GC-MS spectrum for entry 2 of table 3.

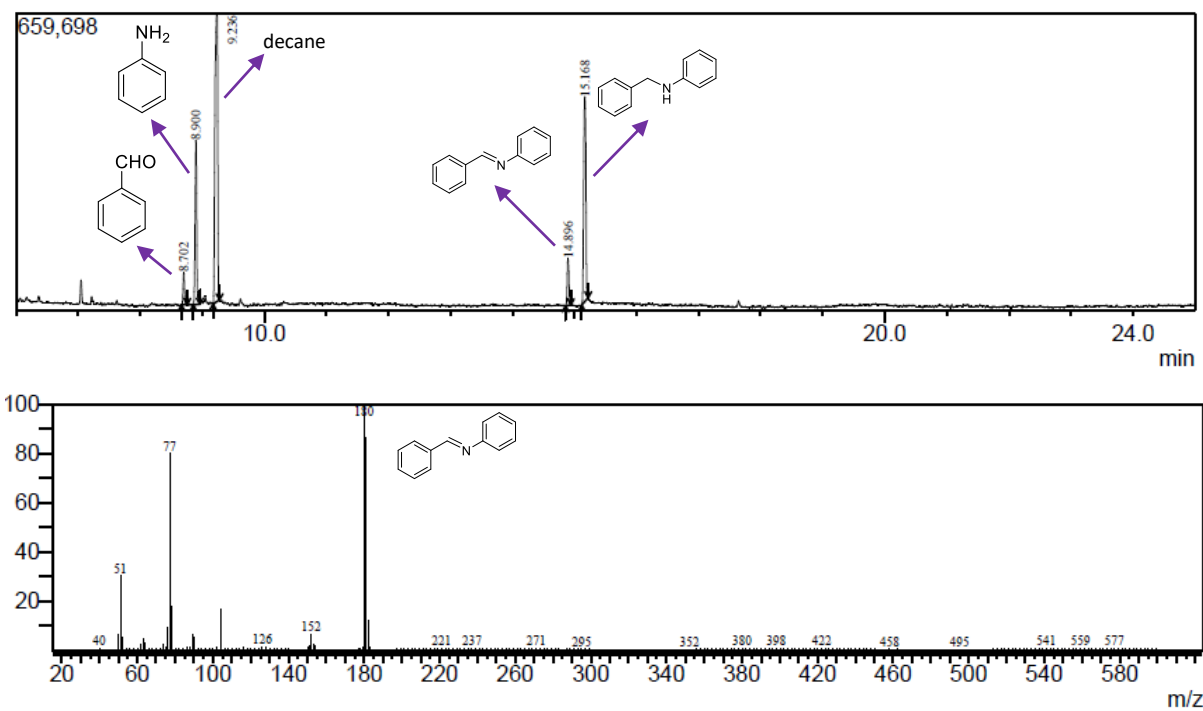

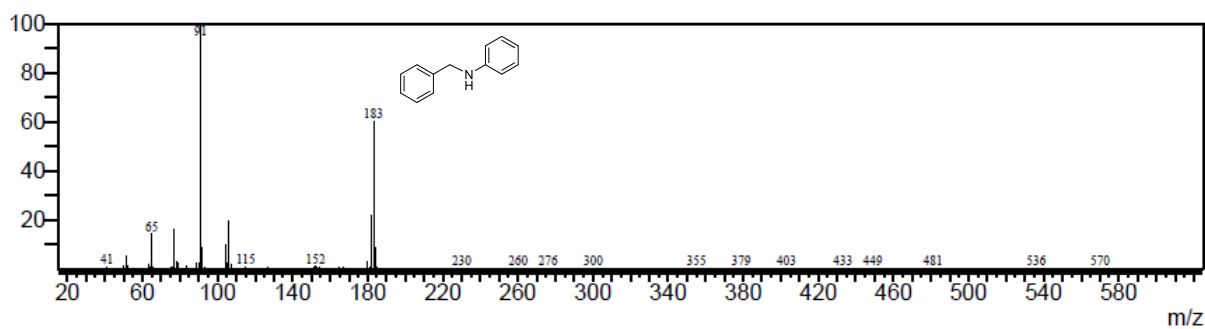

Figure S70. GC-MS spectrum for entry 3 of table 3.

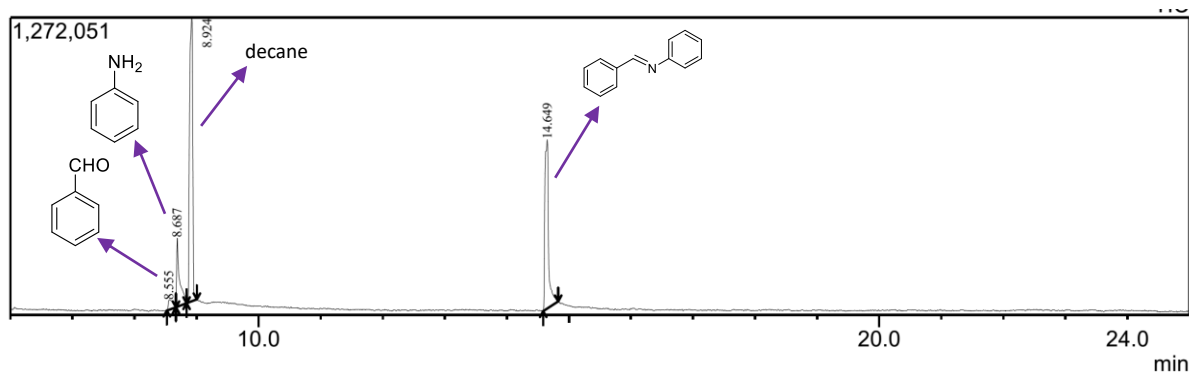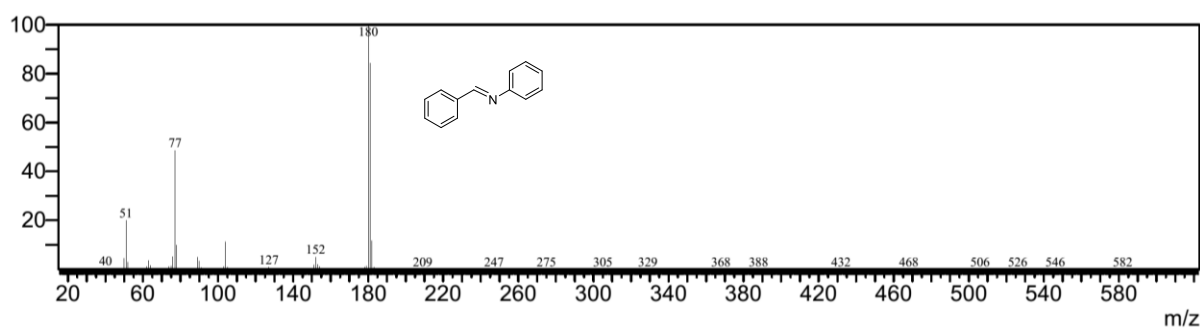

Figure S71. GC-MS spectrum for entry 4 of table 3.

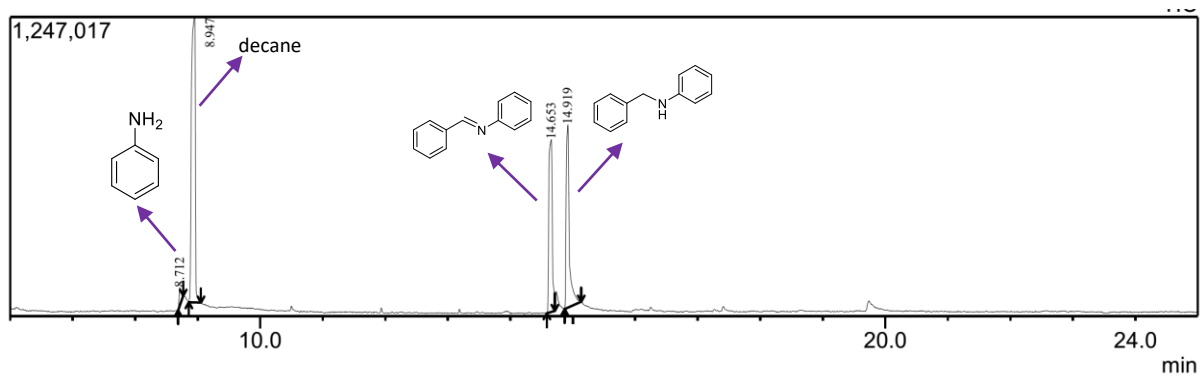

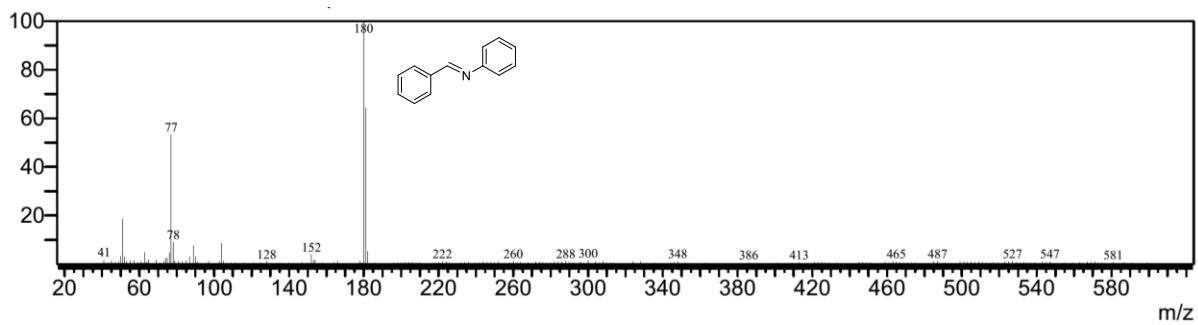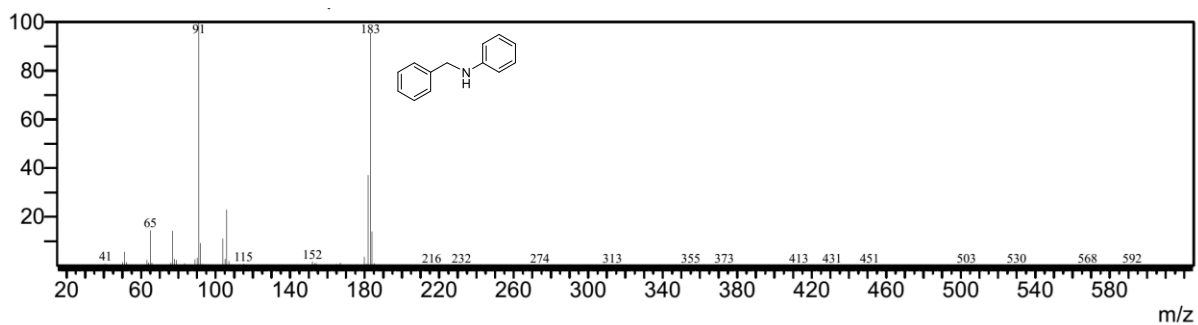

Figure S72. GC-MS spectrum for entry 5 of table 3.

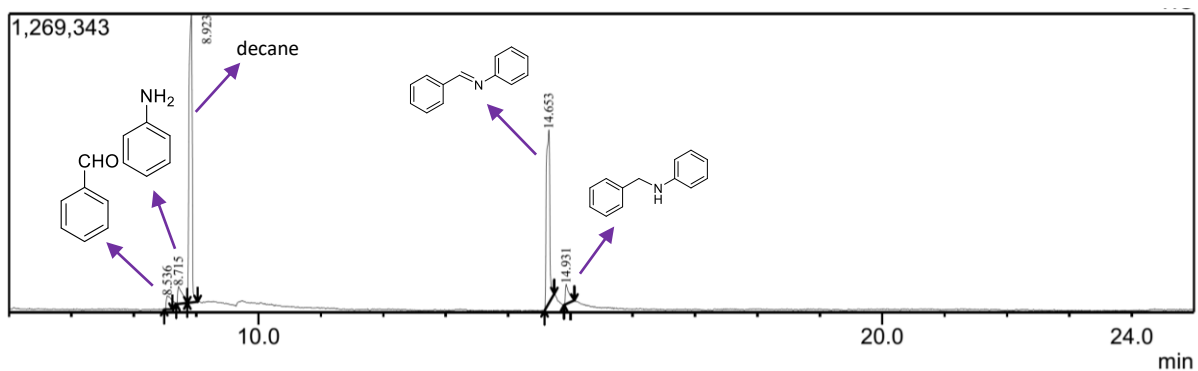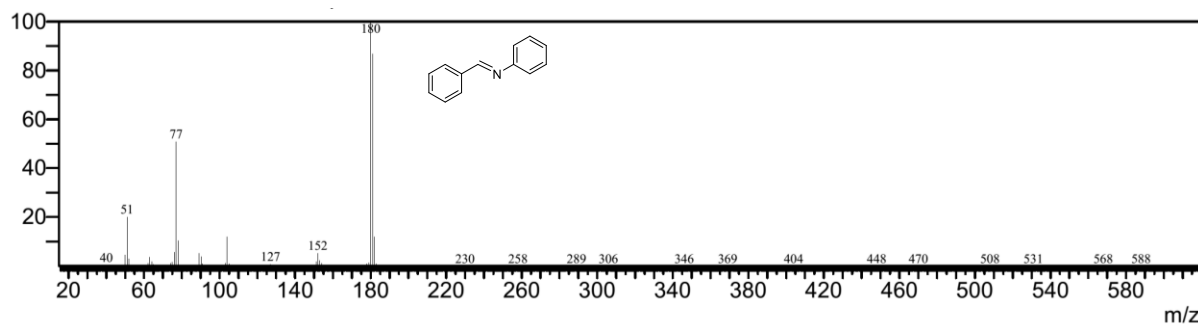

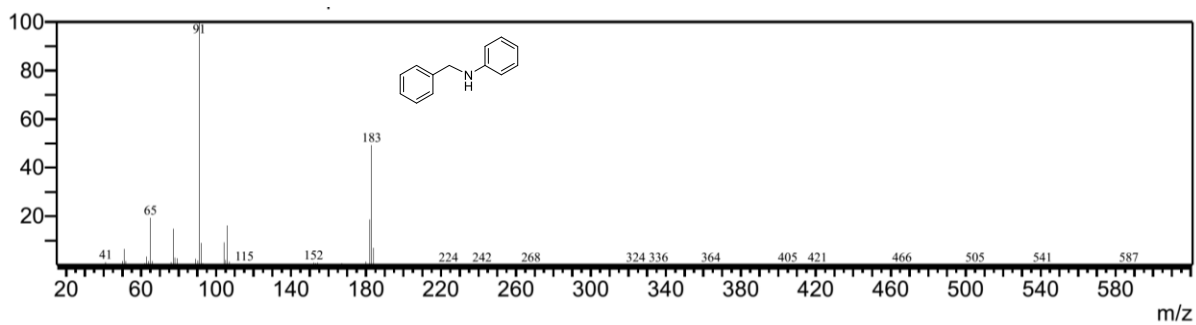

Figure S73. GC-MS spectrum for entry 6 of table 3.

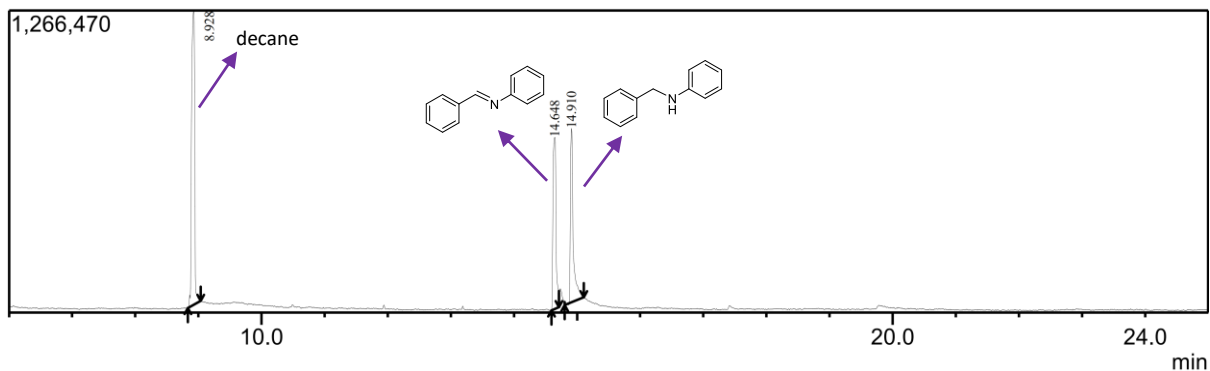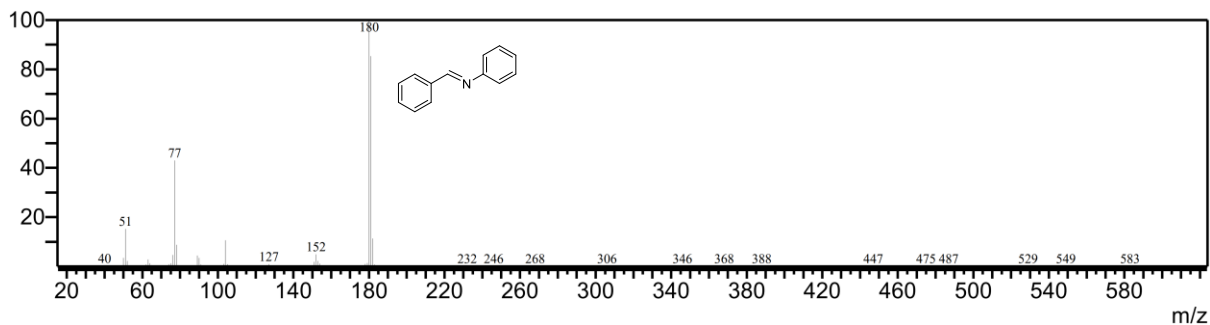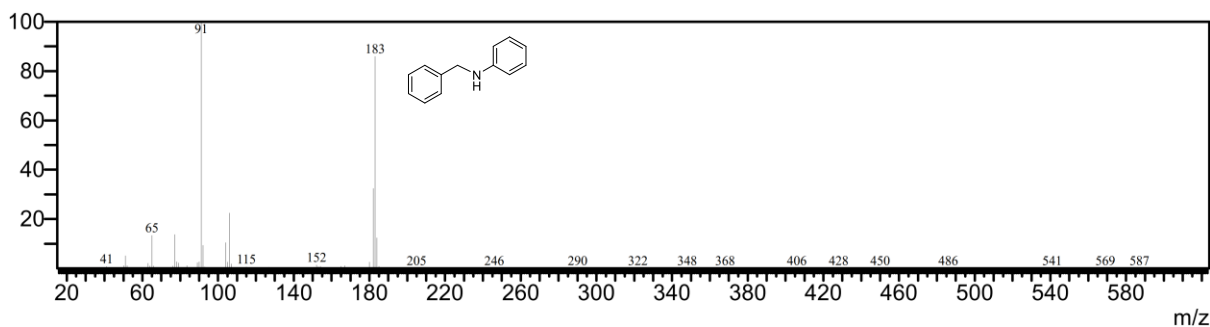

Figure S74. GC-MS spectrum for entry 7 of table 3.

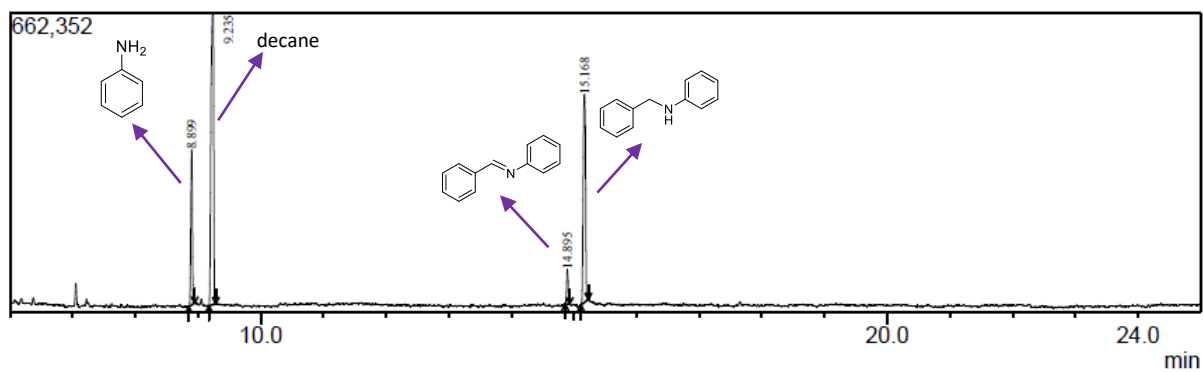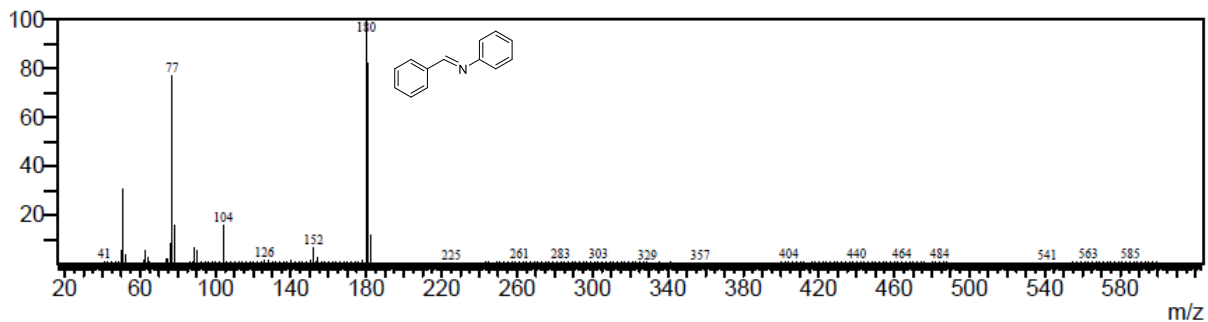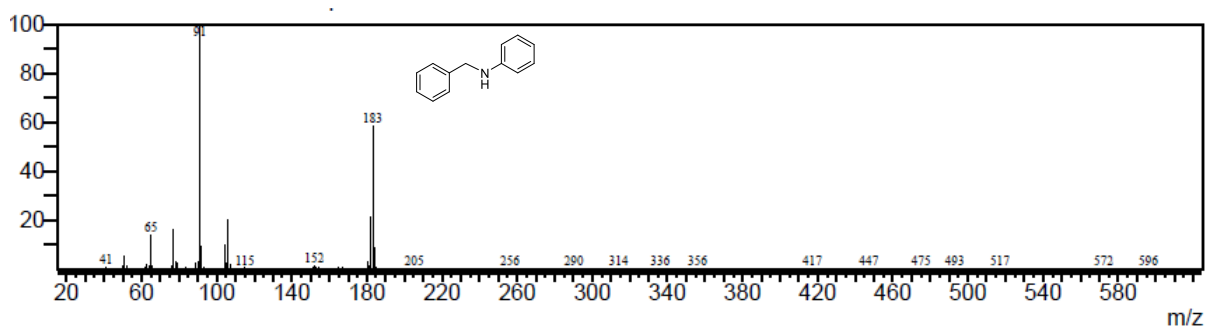

Figure S75. GC-MS spectrum for entry 8 of table 3.

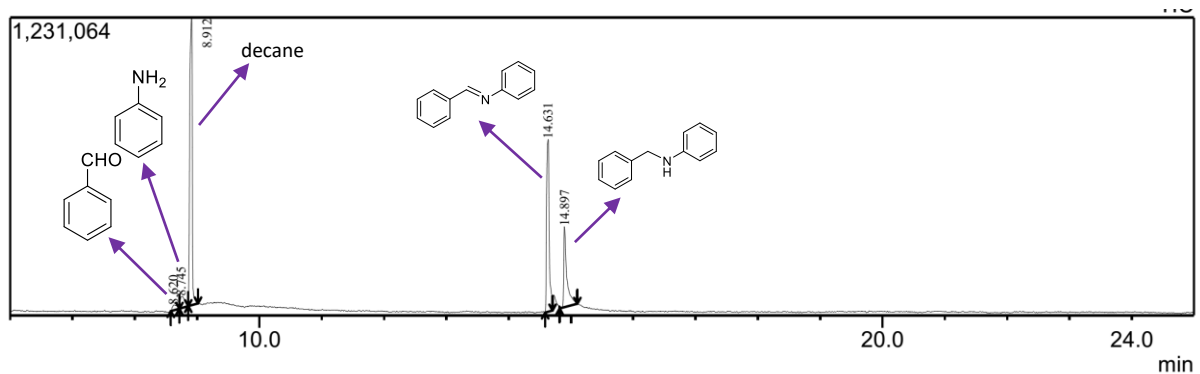



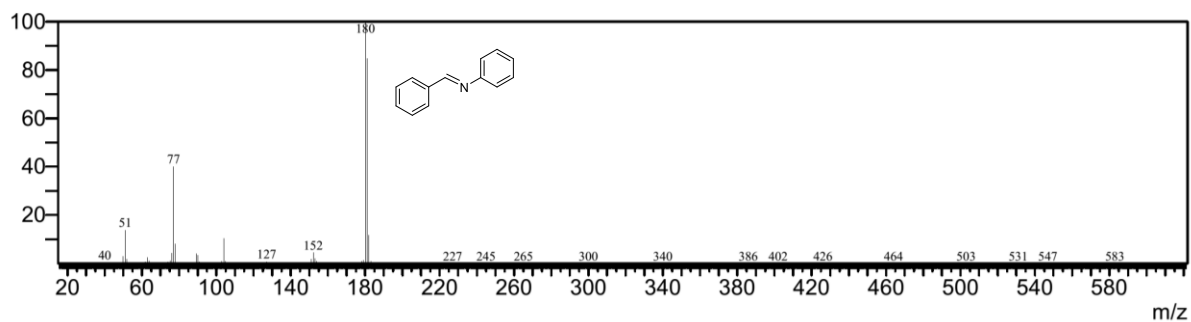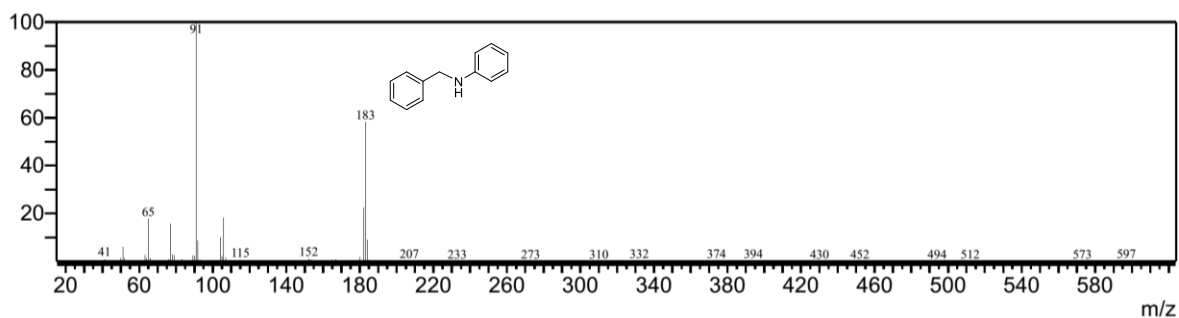

Figure S76. GC-MS spectrum for entry 9 of table 3.

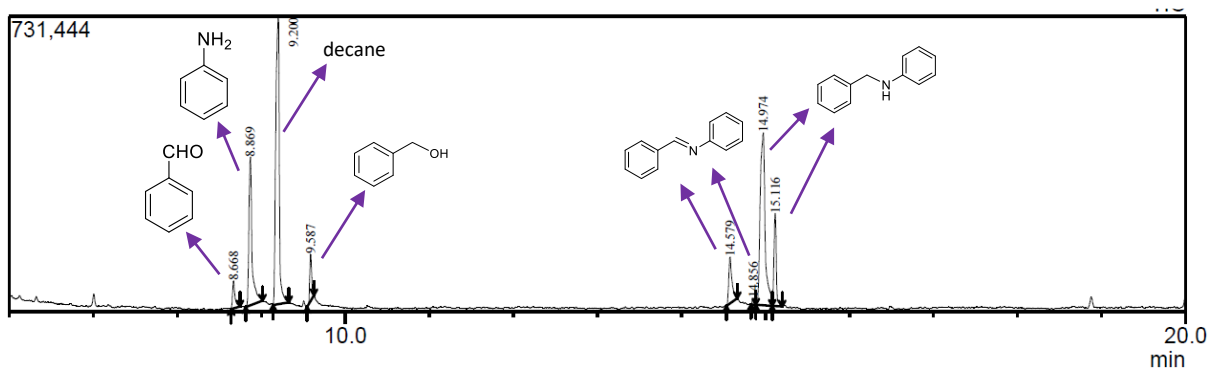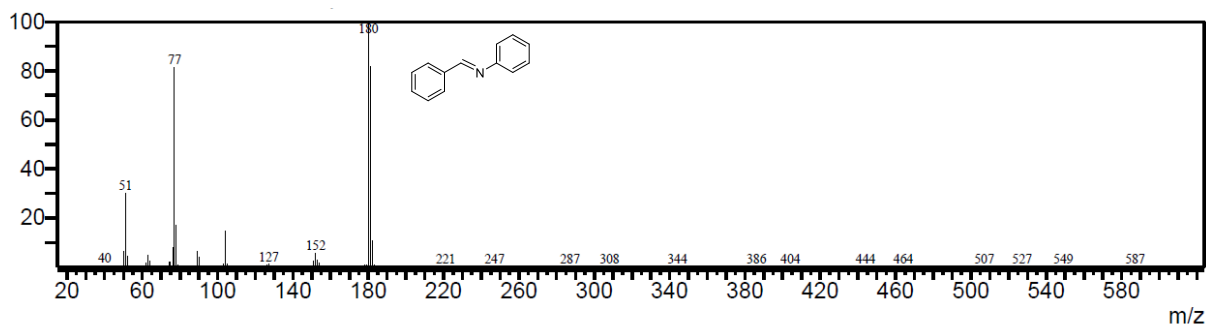

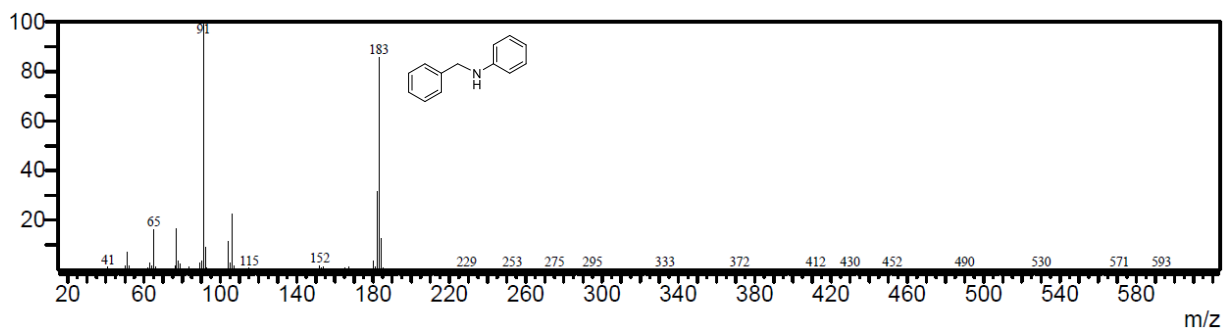

Figure S77. GC-MS spectrum for entry 10 of table 3.

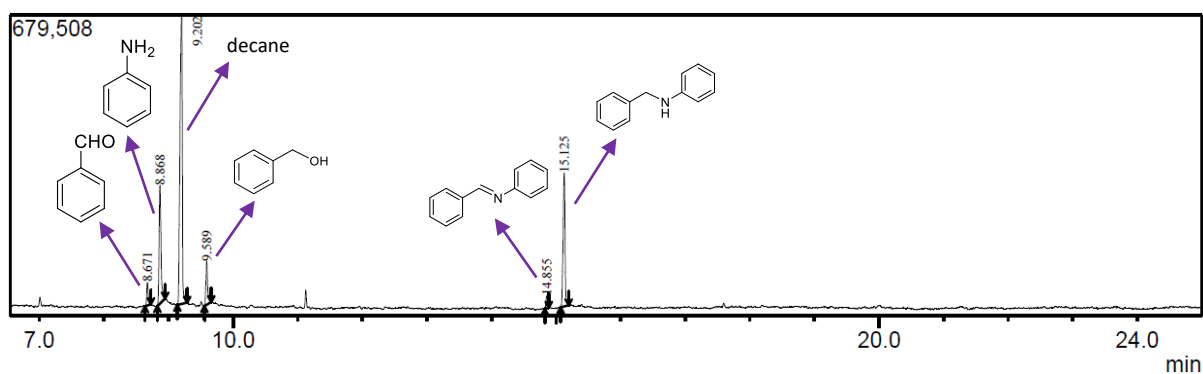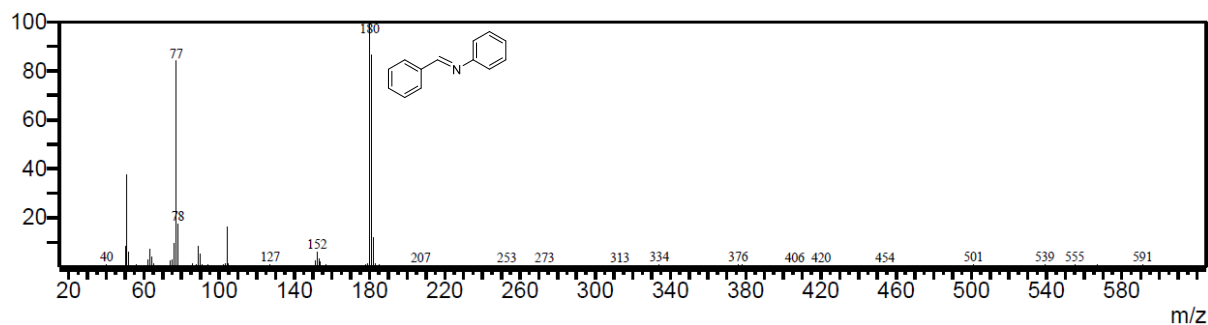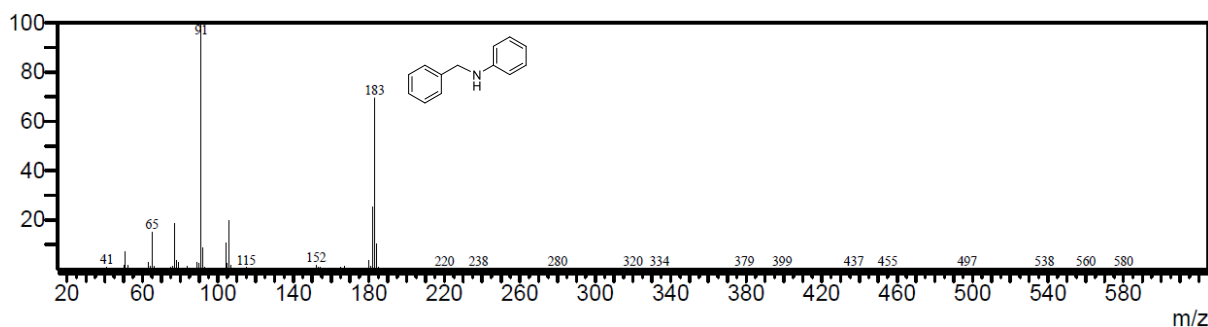

Figure S78. GC-MS spectrum for entry 11 of table 3.

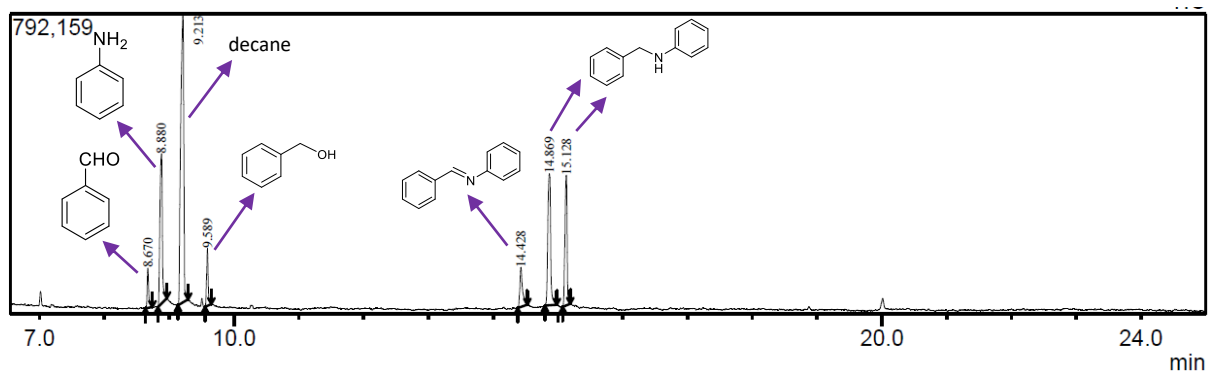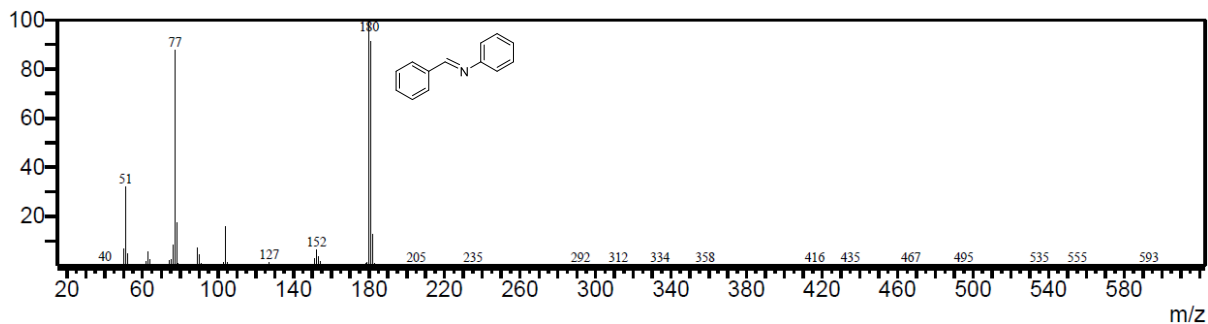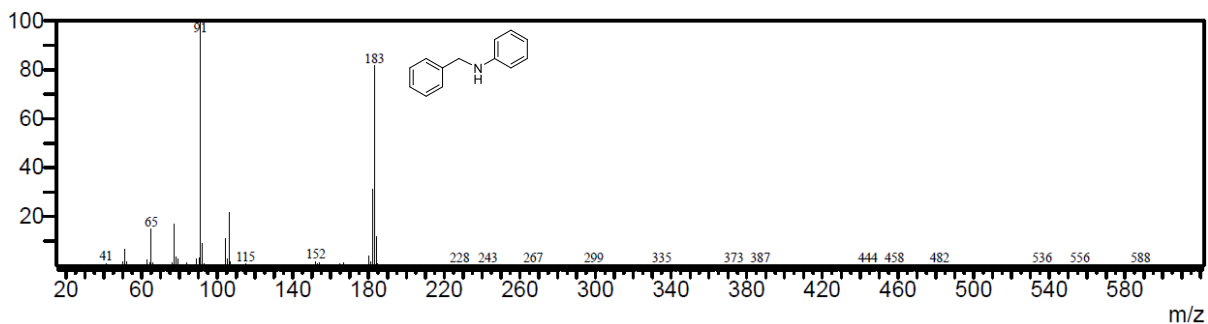

Figure S79. GC-MS spectrum for entry 12 of table 3.

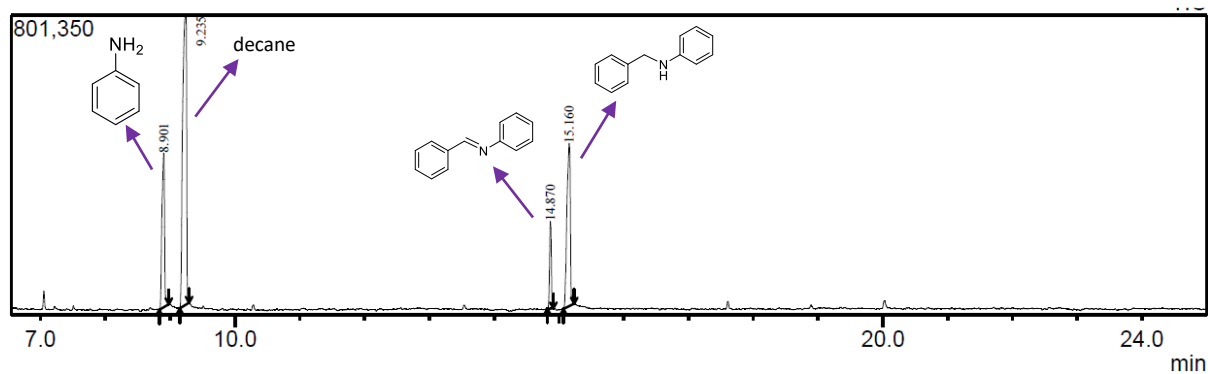

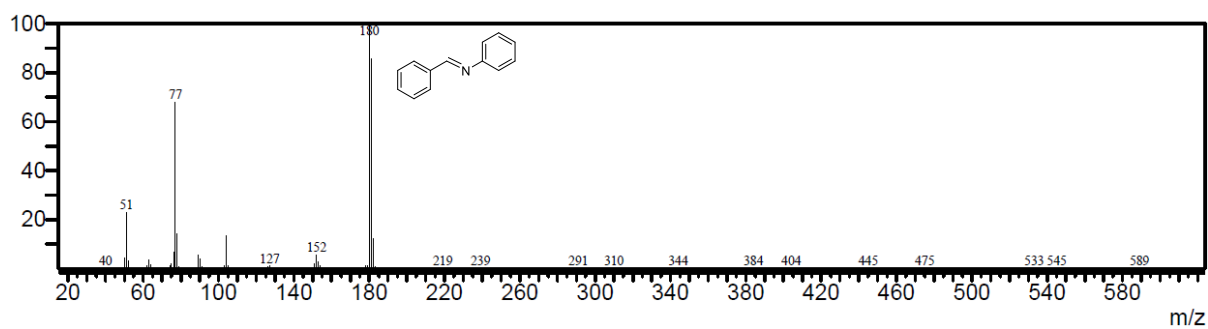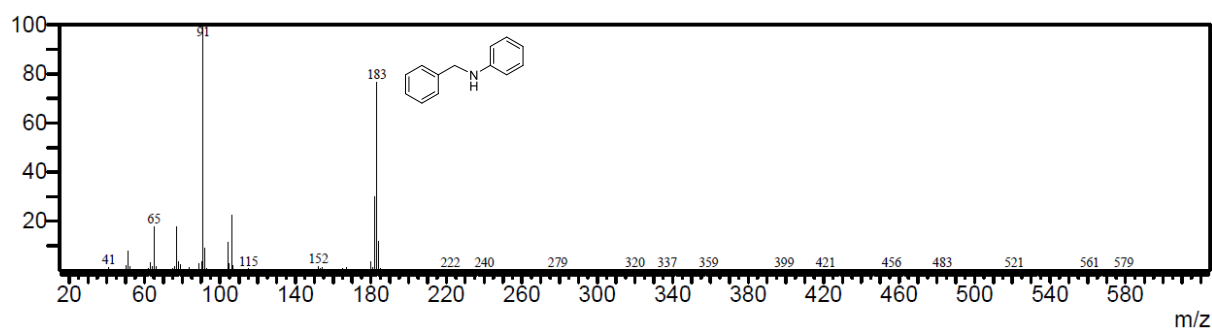

Figure S80. GC-MS spectrum for entry 13 of table 3.

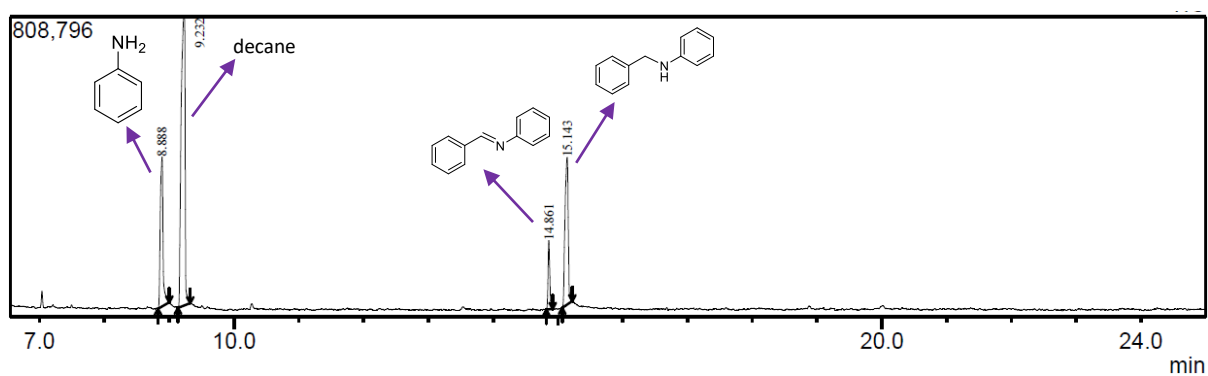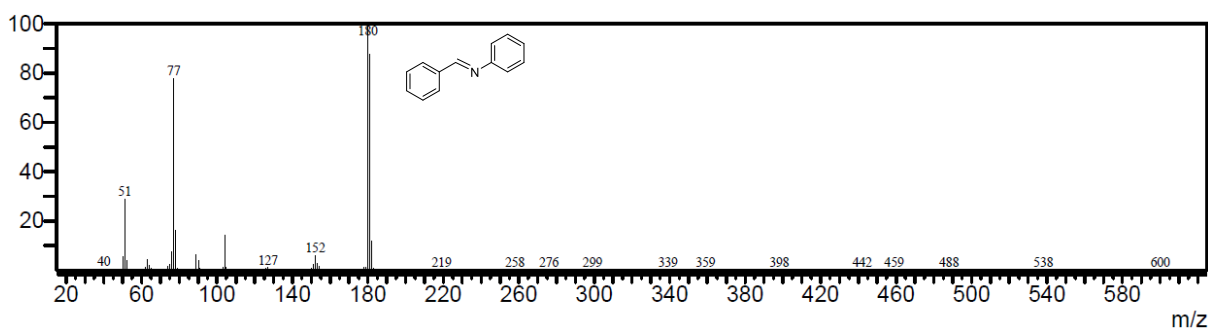

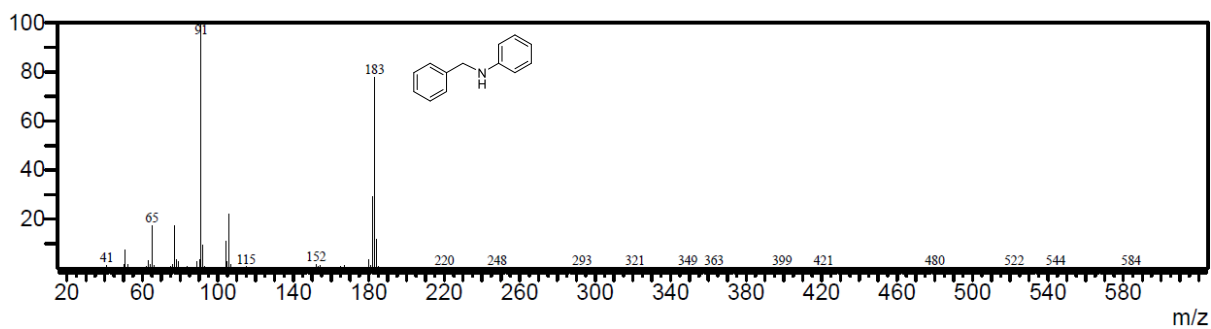

Figure S81. GC-MS spectrum for entry 14 of table 3.

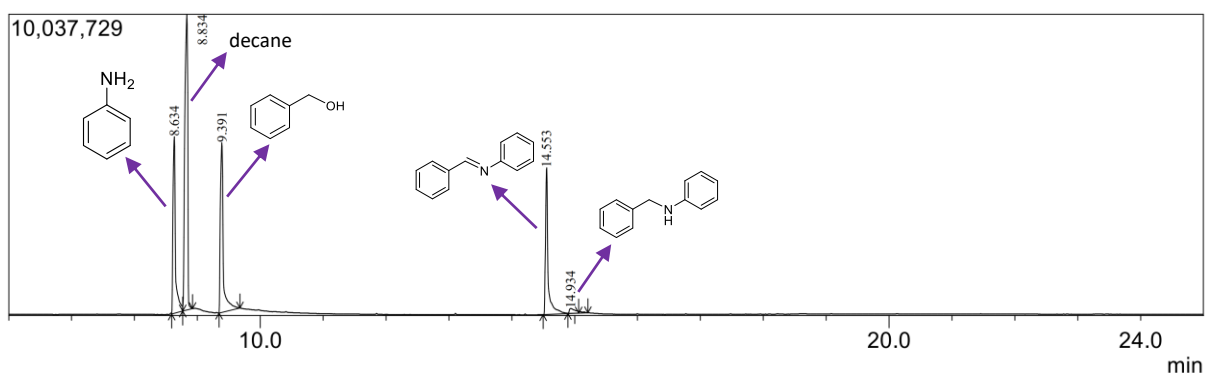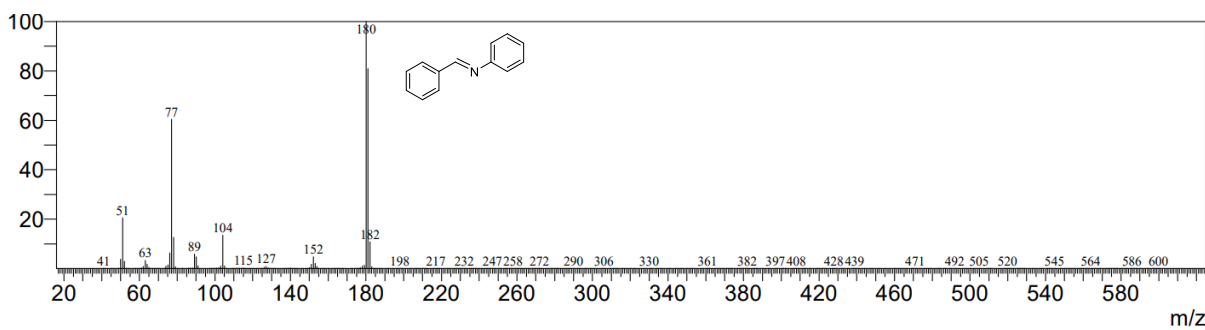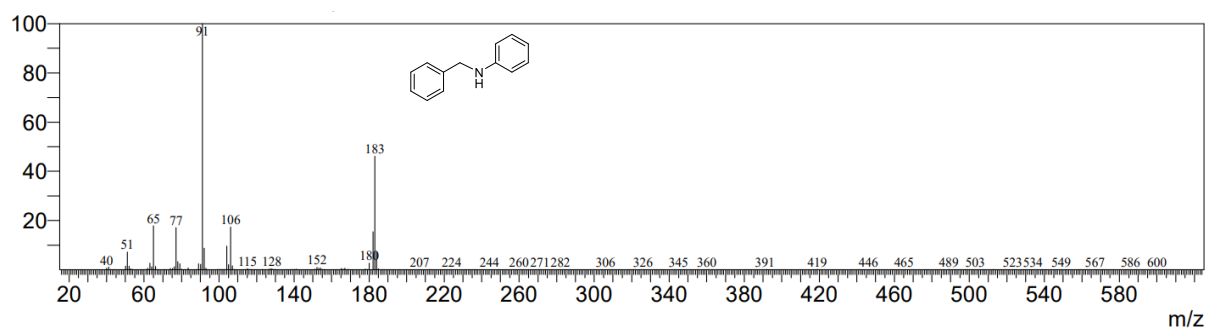

Figure S82. GC-MS spectrum for entry 15 of table 3.

GC-MS spectra of Acceptorless dehydrogenative coupling products for table 4.

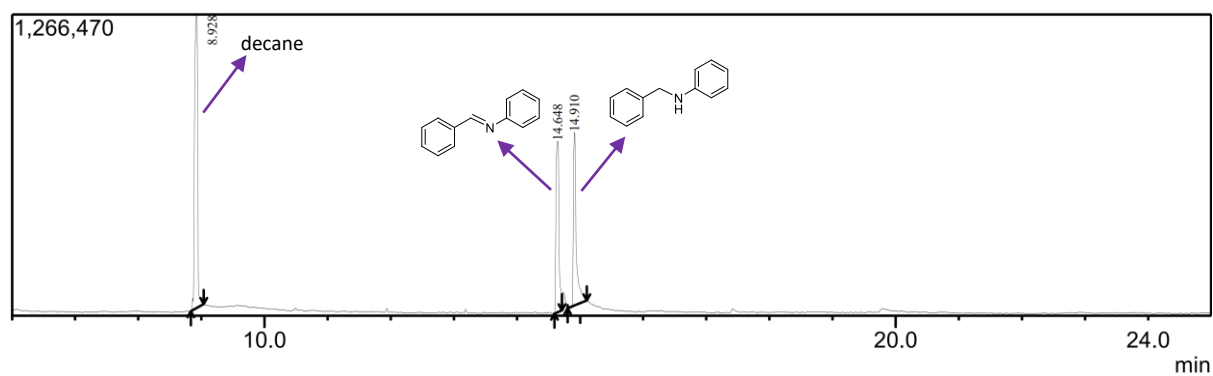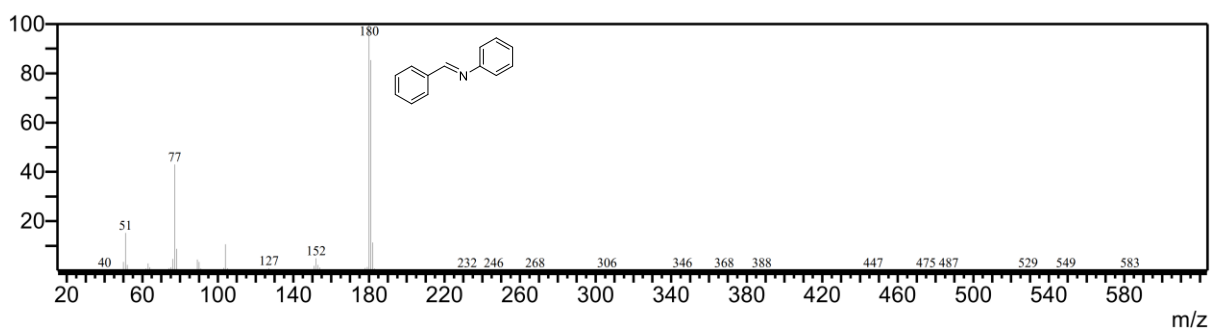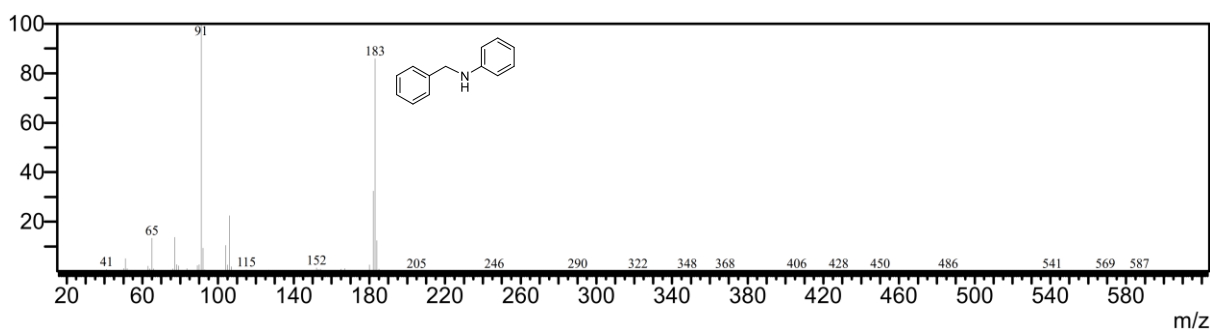

Figure S83. GC-MS spectrum for entry 1 of table 4.

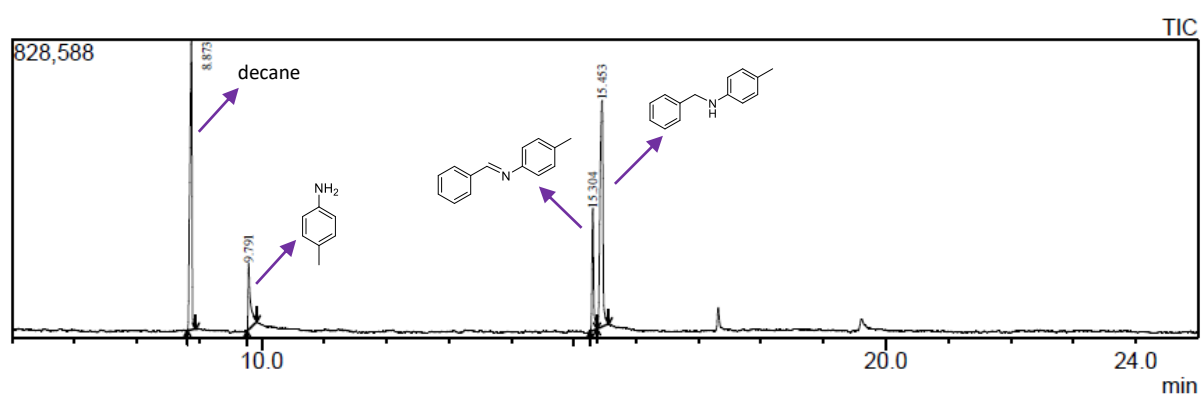

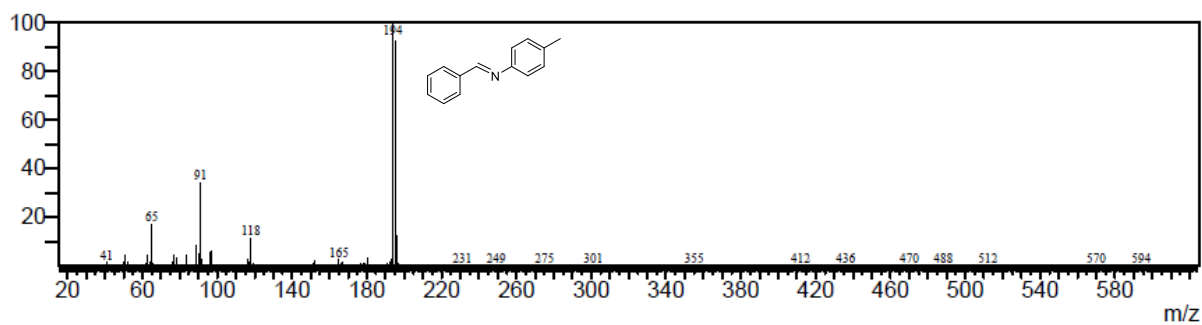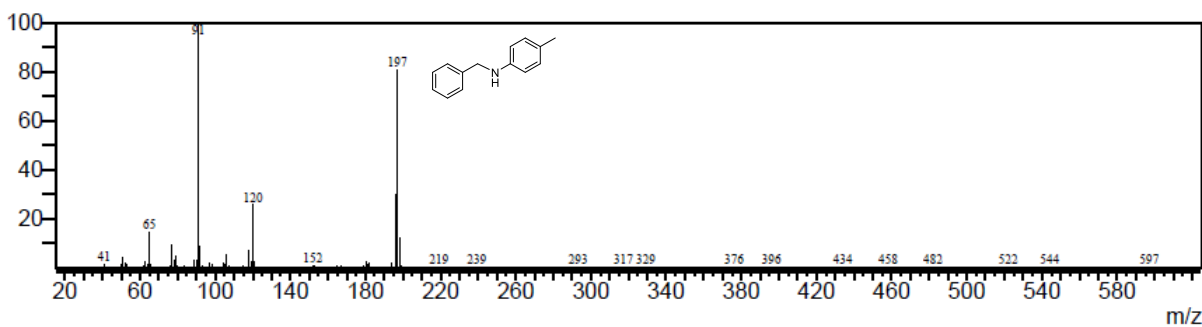

Figure S84. GC-MS spectrum for entry 2 of table 4.

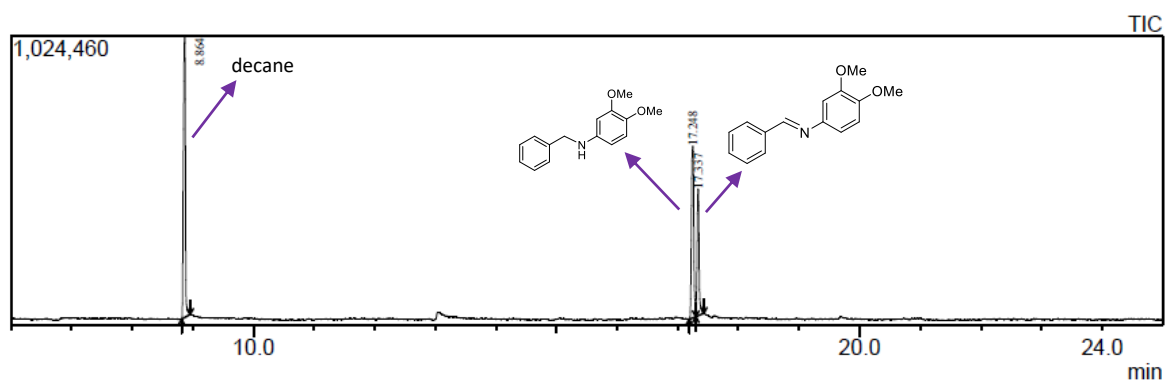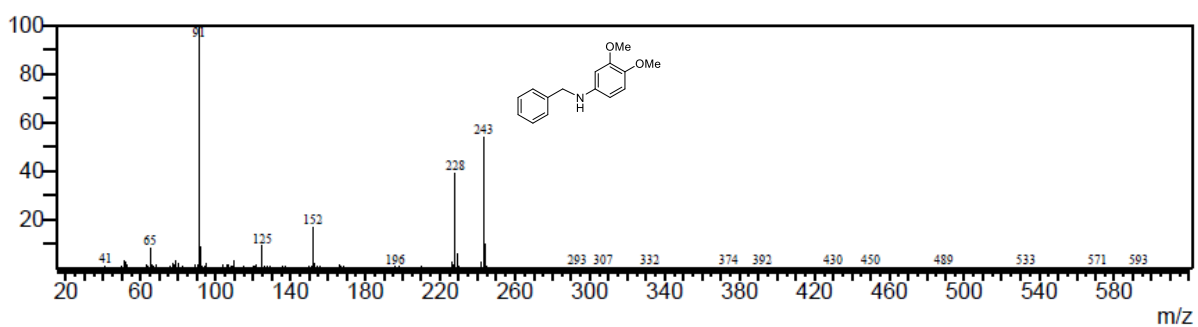

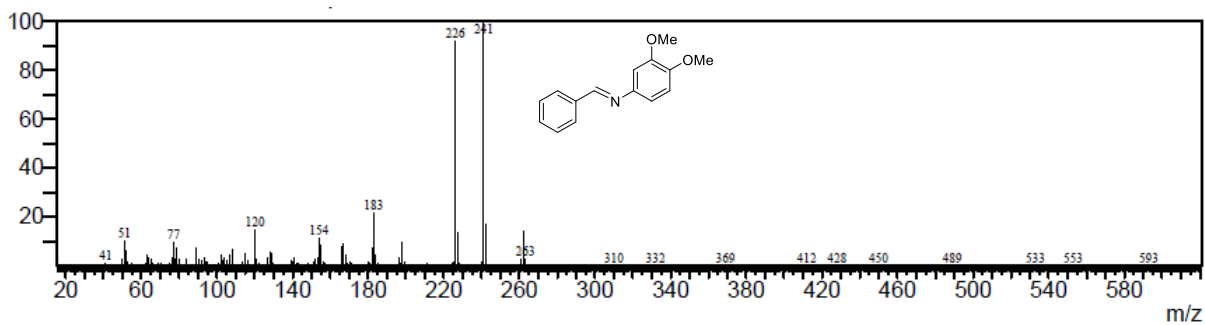

Figure S85. GC-MS spectrum for entry 3 of table 4.

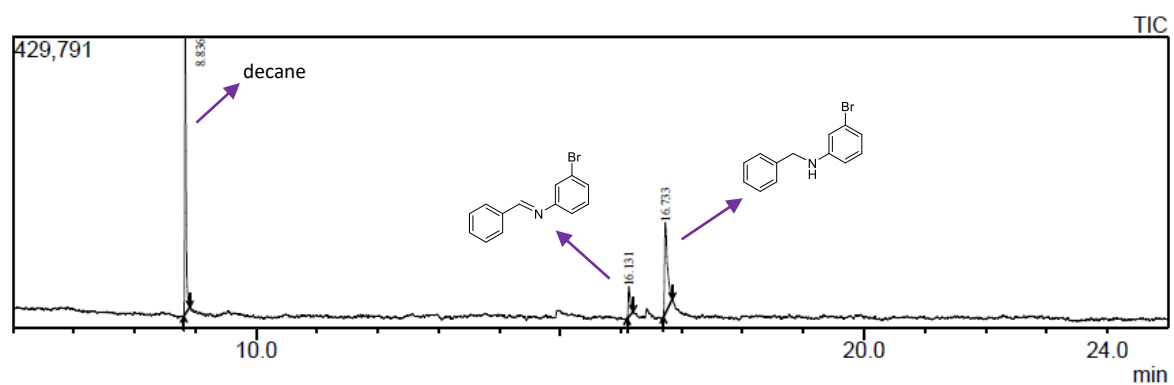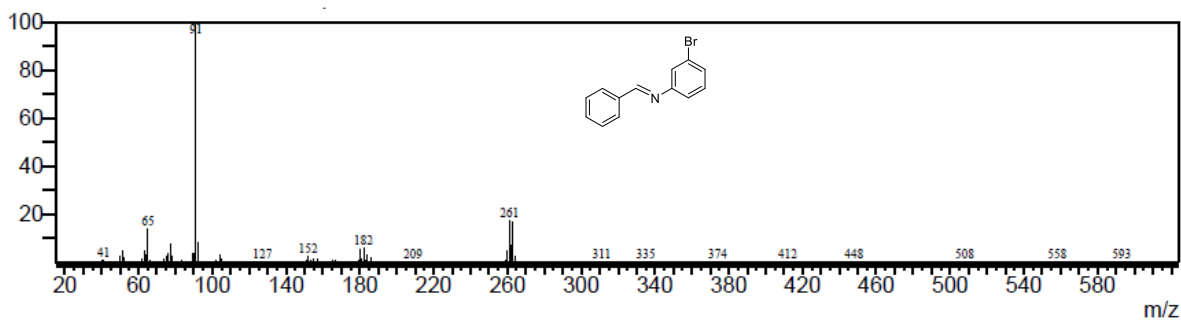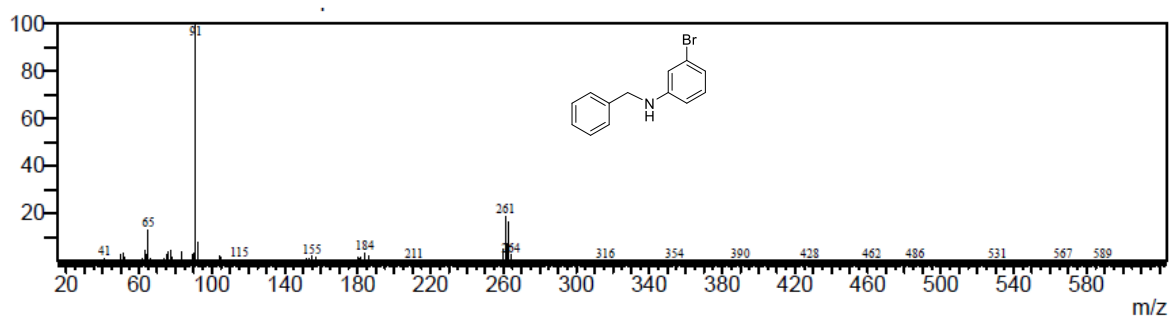

Figure S86. GC-MS spectrum for entry 4 of table 4.



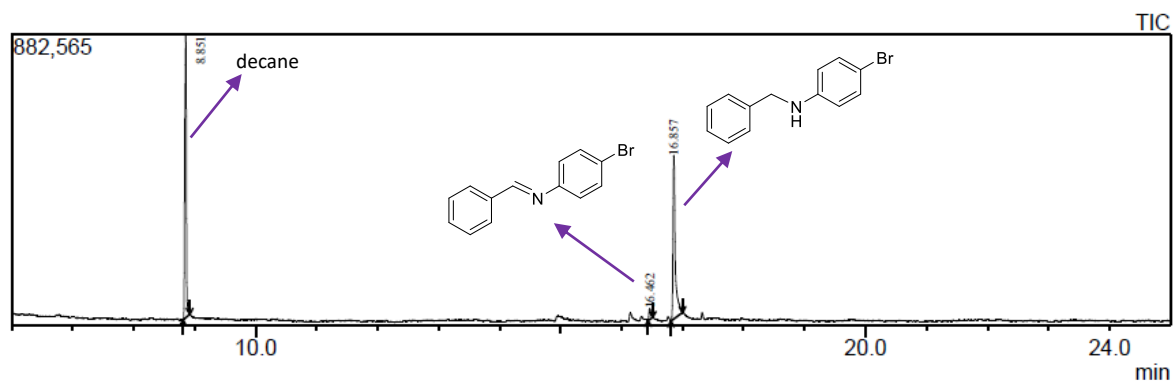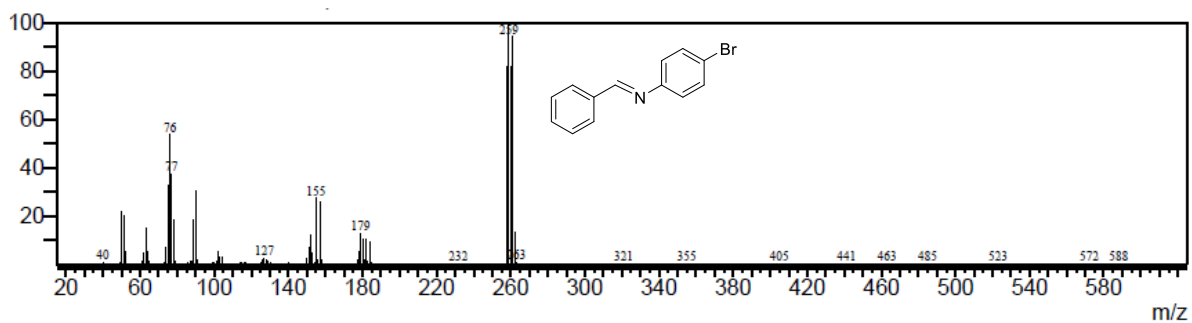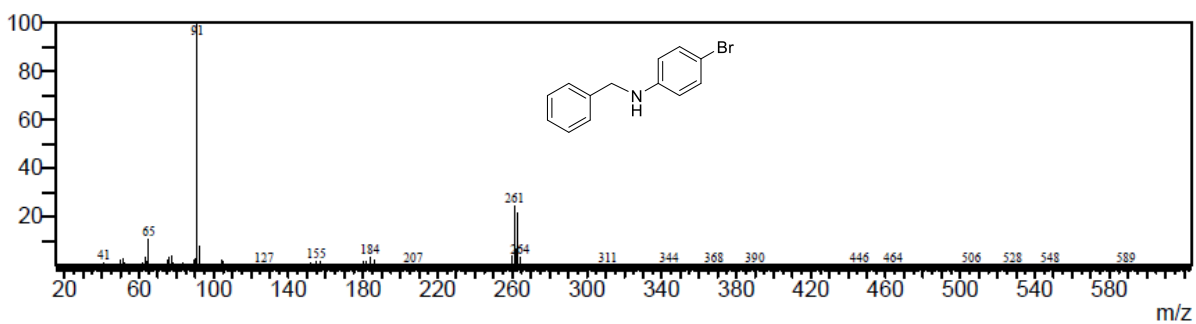

Figure S87. GC-MS spectrum for entry 5 of table 4.

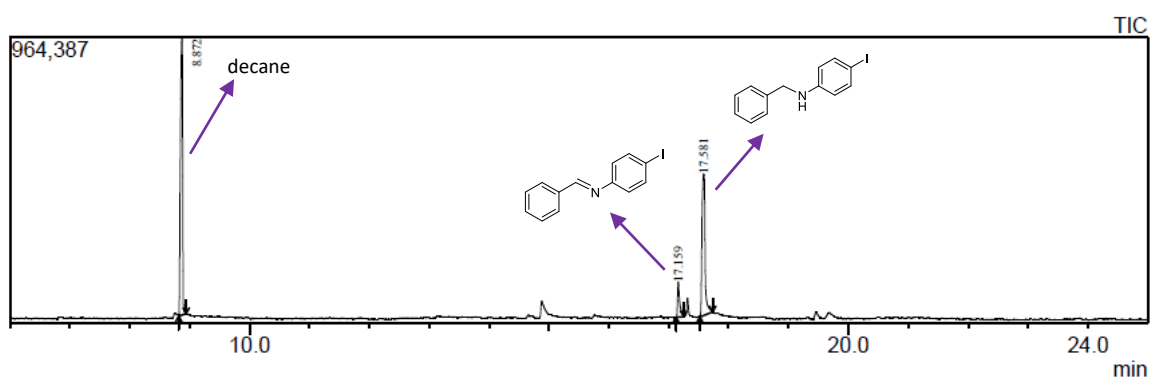

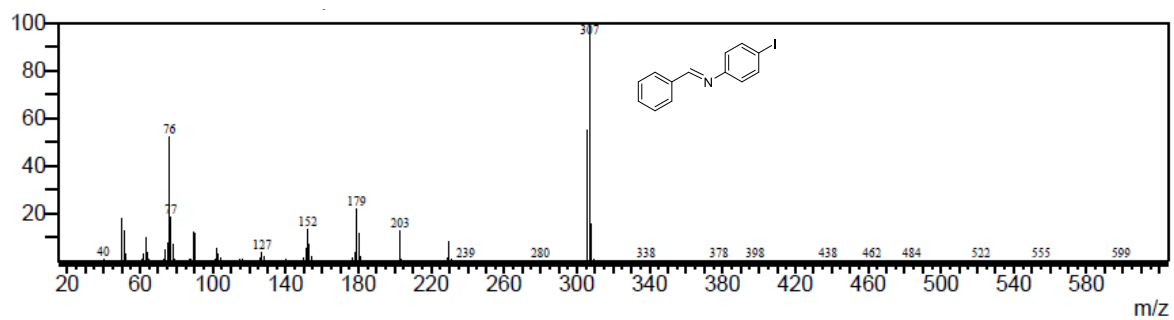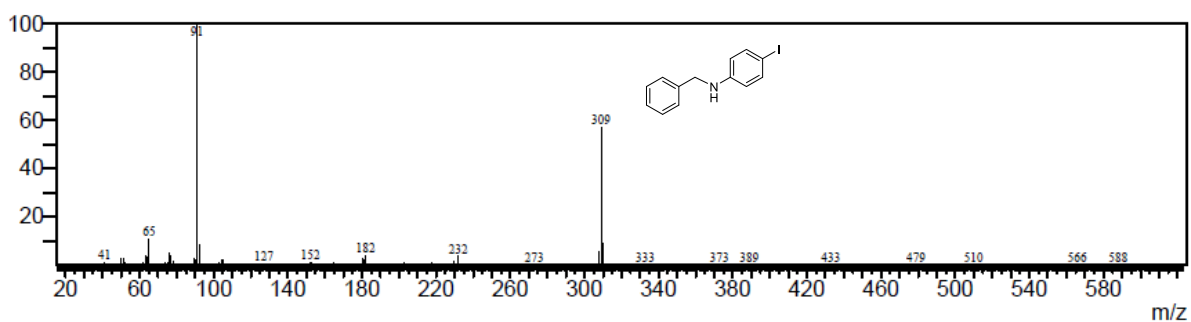

Figure S88. GC-MS spectrum for entry 6 of table 4.

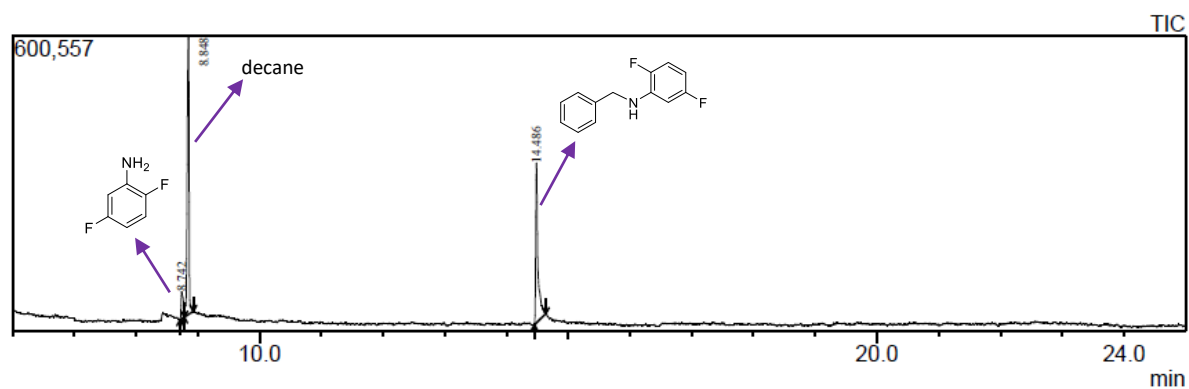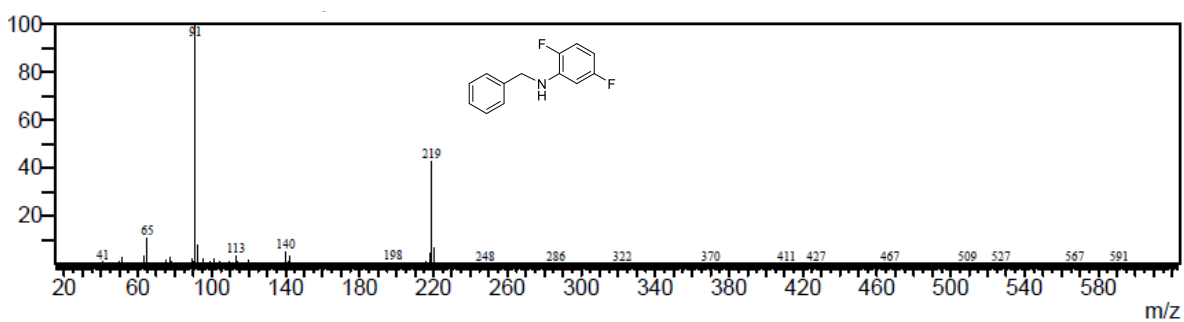

Figure S89. GC-MS spectrum for entry 7 of table 4.

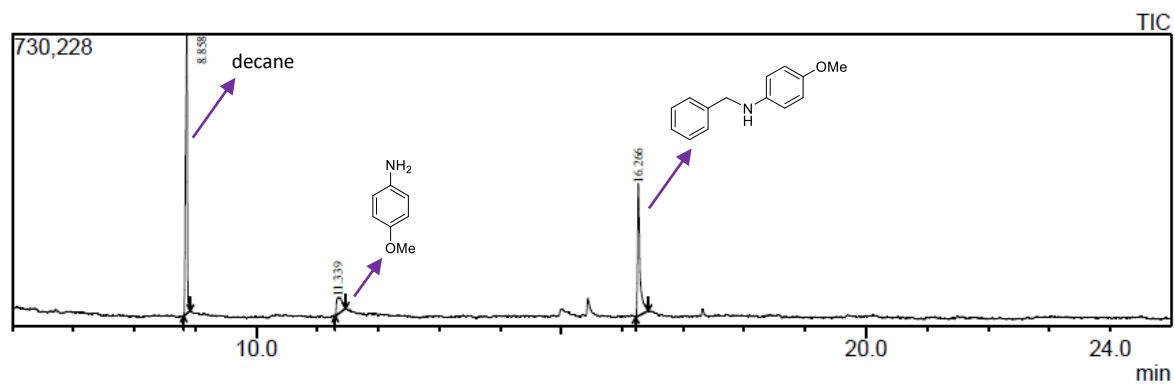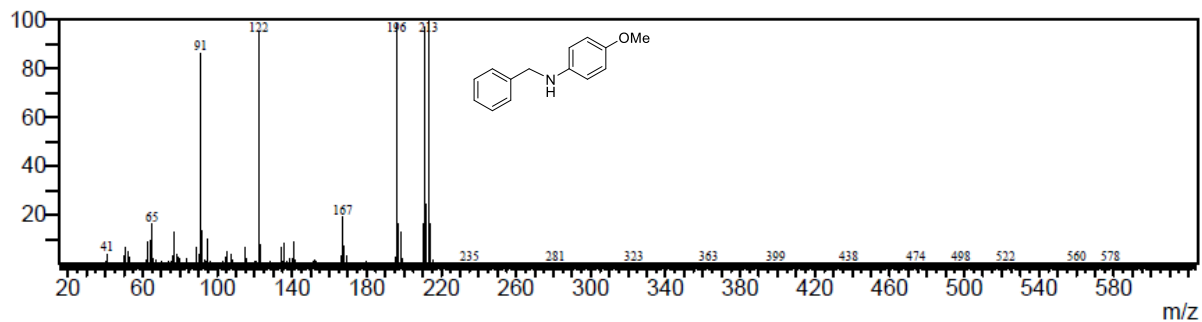

Figure S90. GC-MS spectrum for entry 8 of table 4.

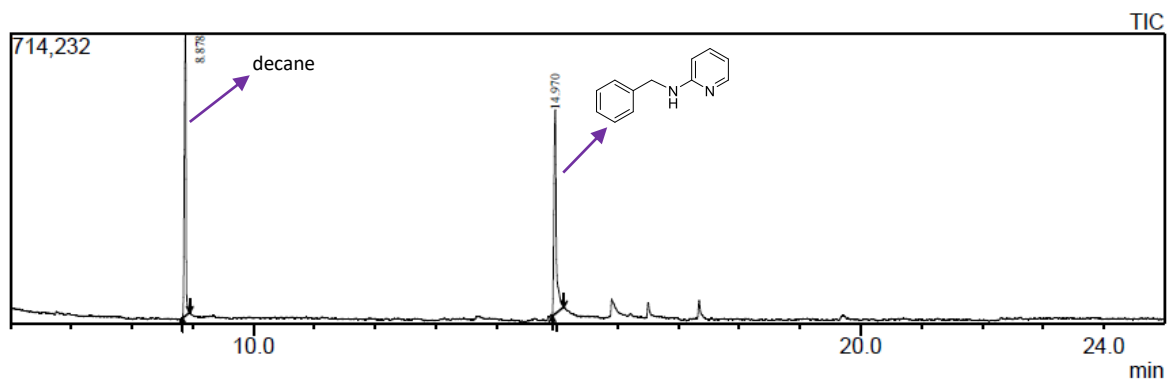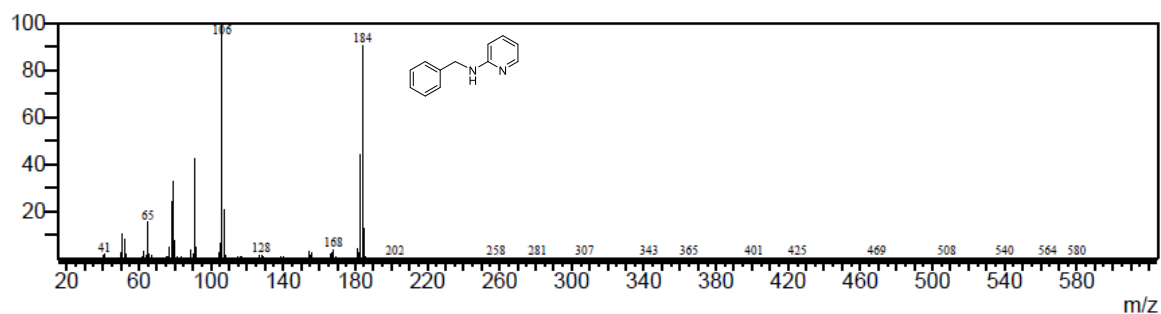

Figure S91. GC-MS spectrum for entry 9 of table 4.

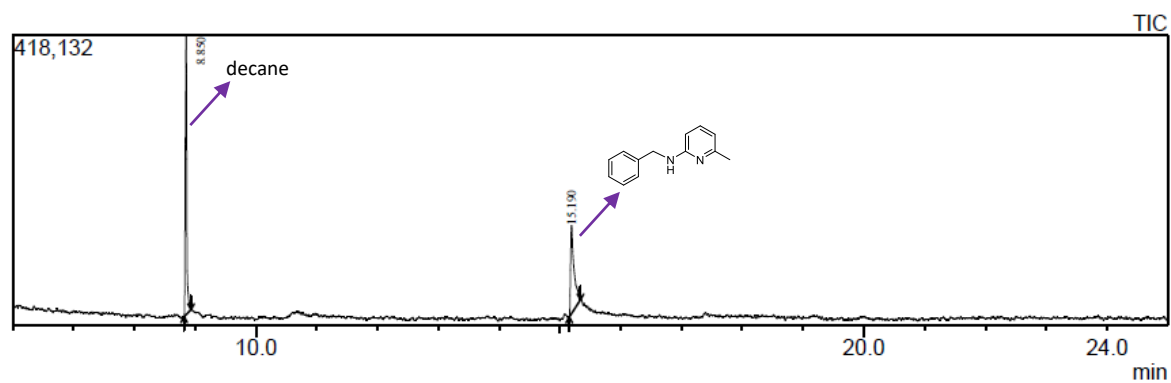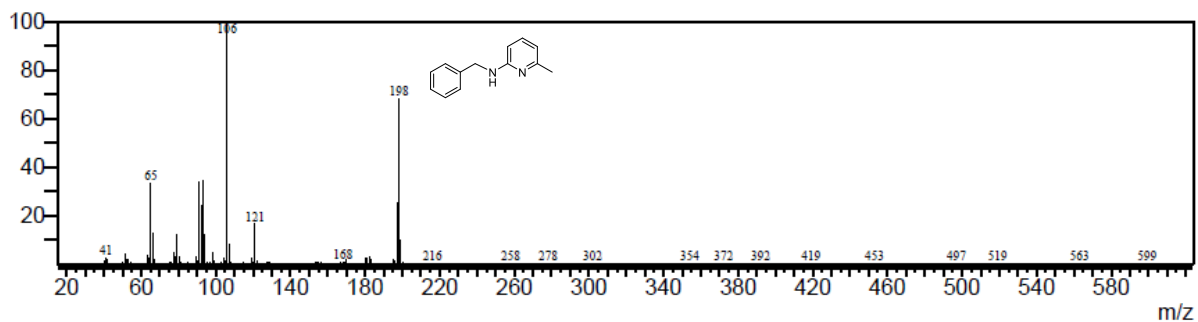

Figure S92. GC-MS spectrum for entry 10 of table 4.

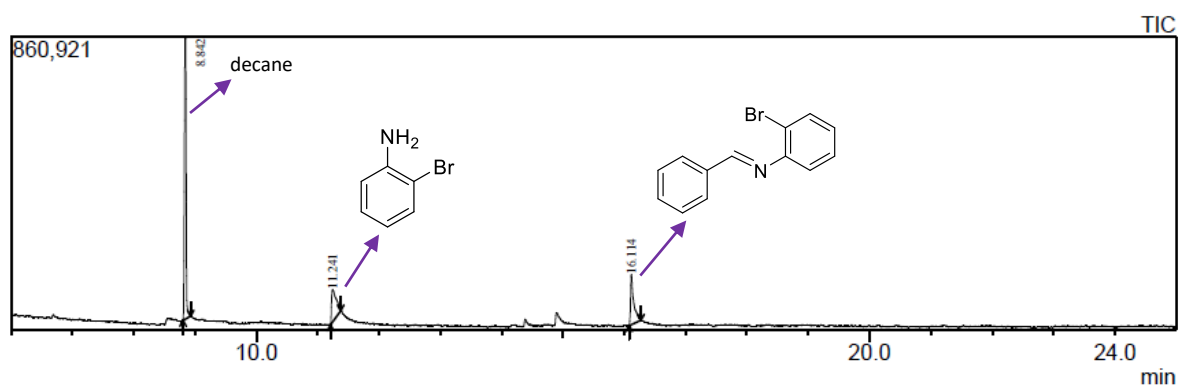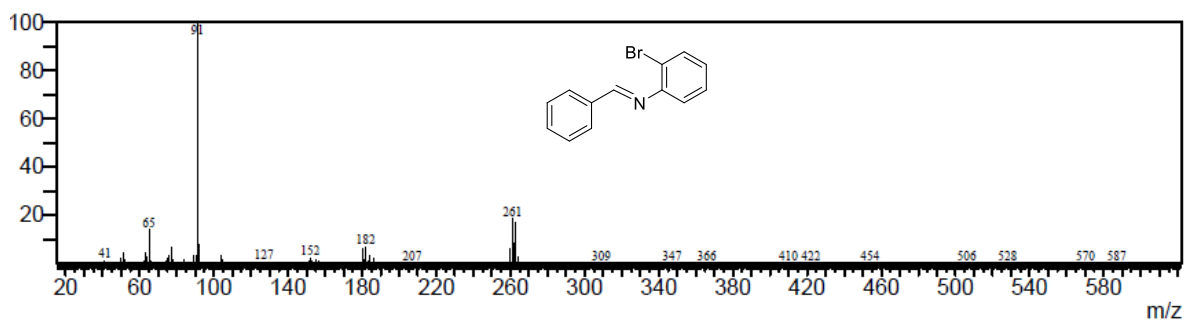

Figure S93. GC-MS spectrum for entry 11 of table 4.

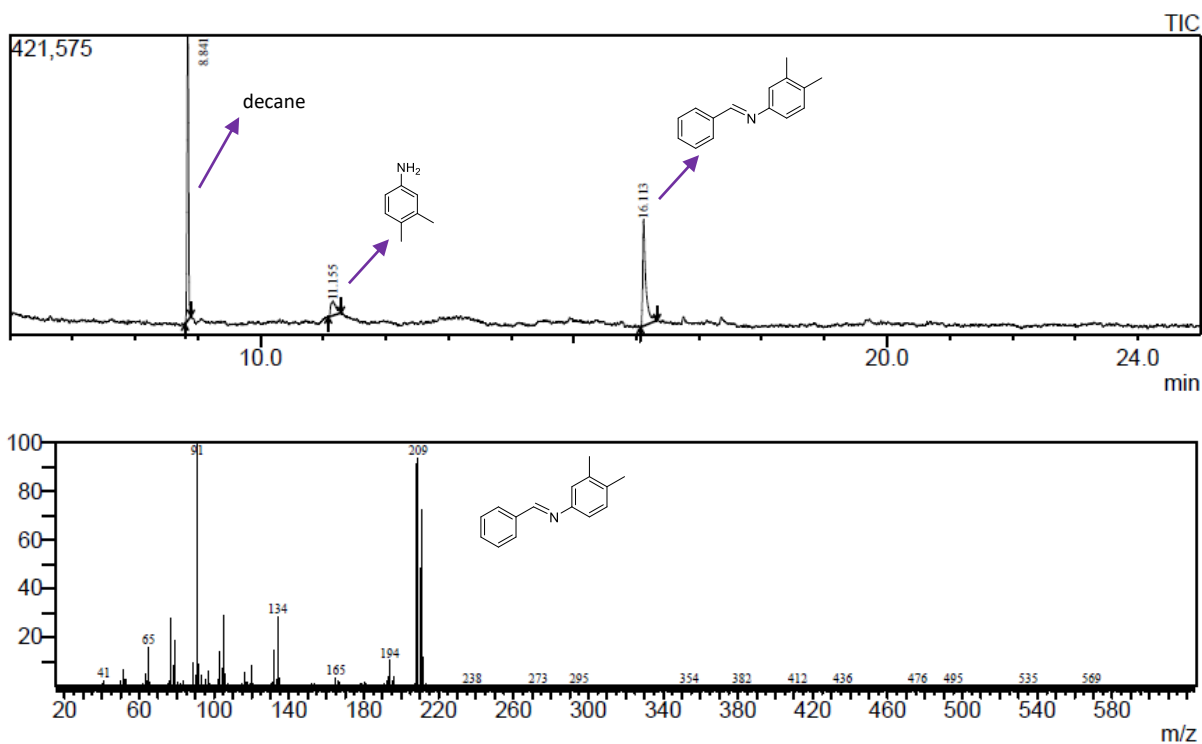

Figure S94. GC-MS spectrum for entry 12 of table 4.

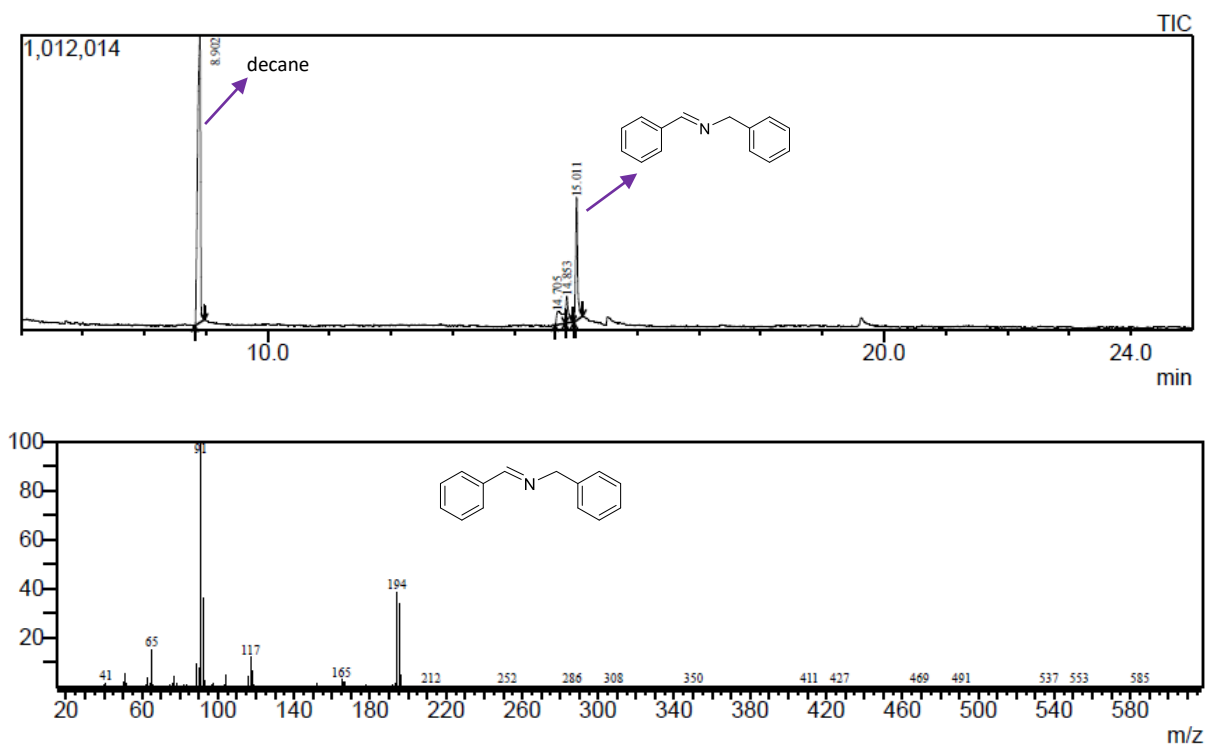

Figure S95. GC-MS spectrum for entry 13 of table 4.

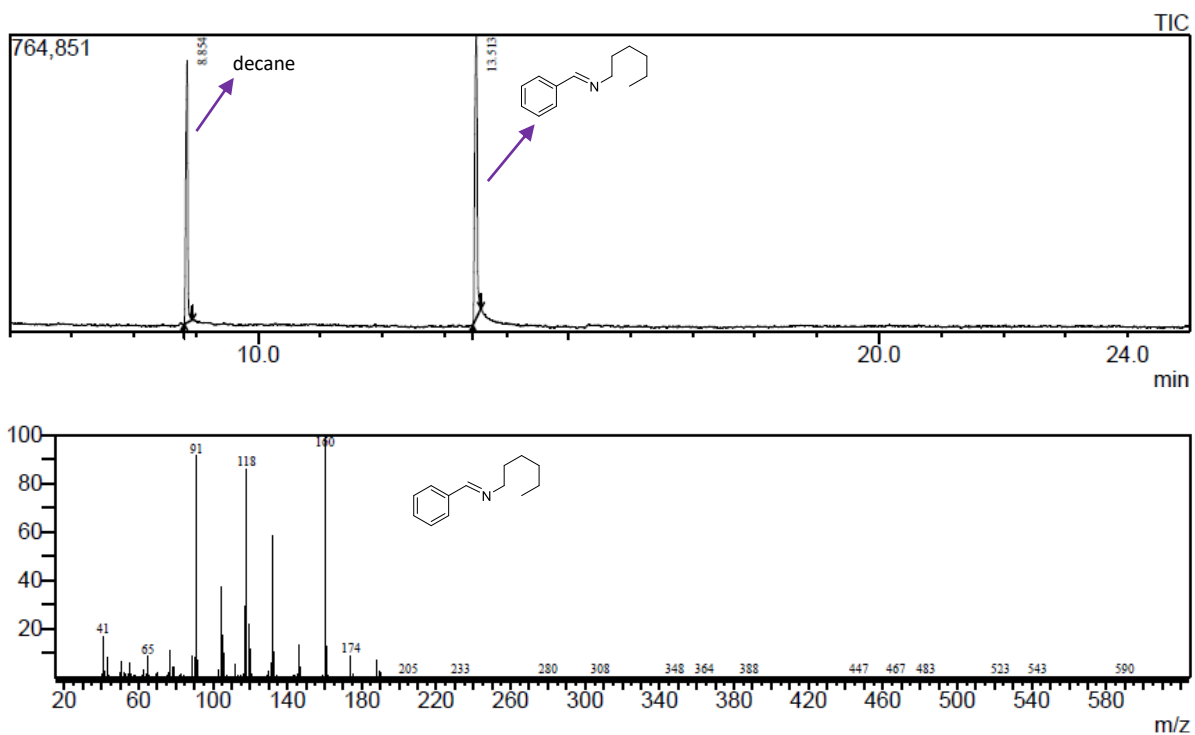

Figure S96. GC-MS spectrum for entry 14 of table 4.

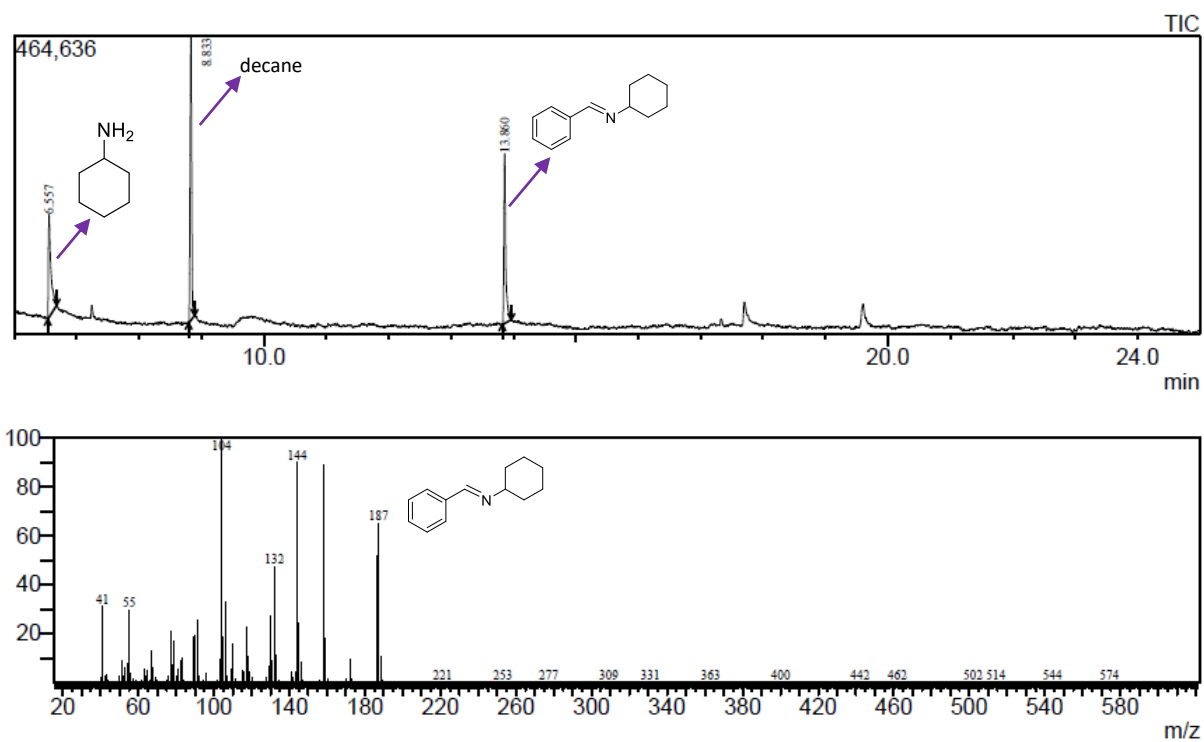

Figure S97. GC-MS spectrum for entry 15 of table 4.

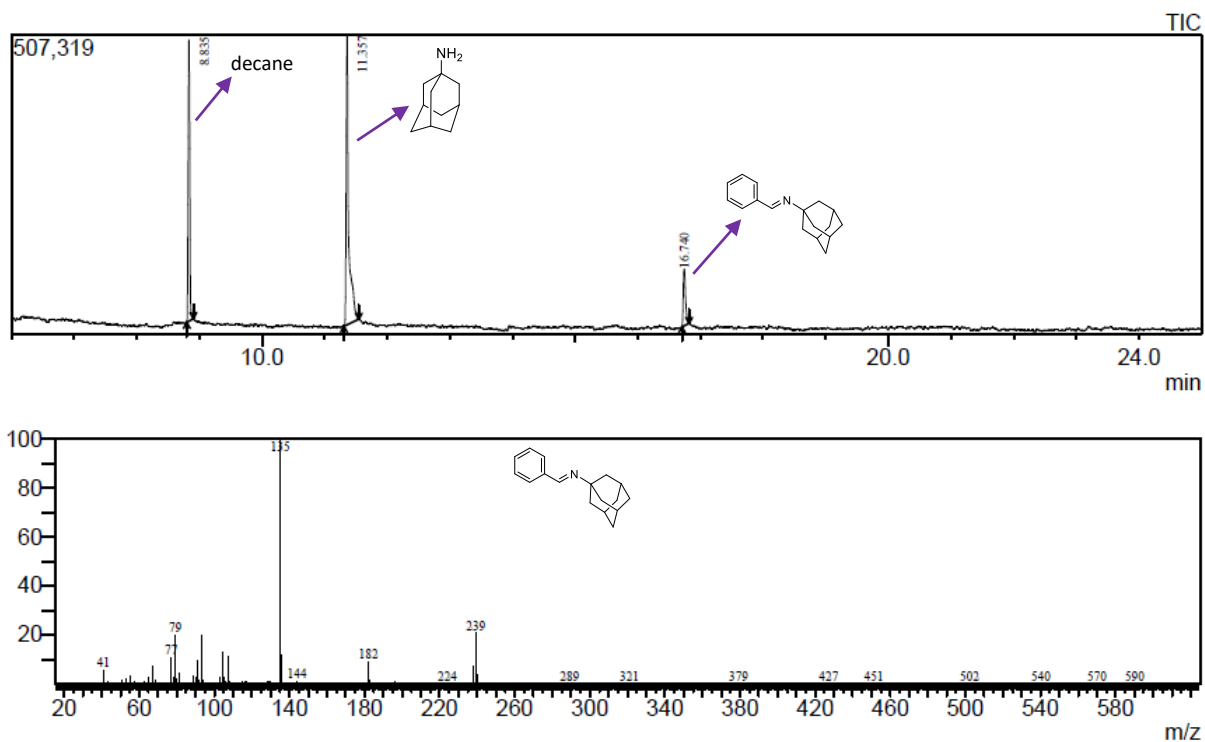

Figure S98. GC-MS spectrum for entry 16 of table 4.

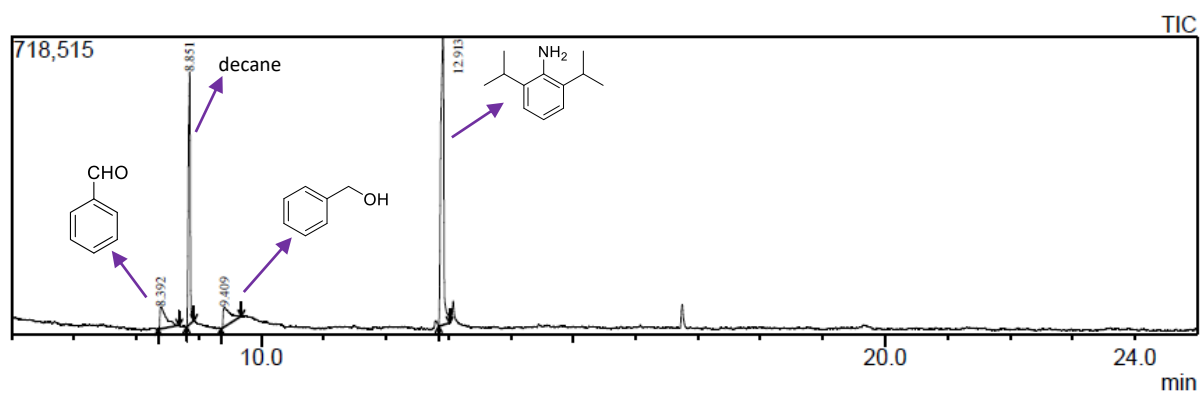

Figure S99. GC-MS spectrum for entry 17 of table 4.

GC-MS spectra of Acceptorless dehydrogenative coupling products for table 5.

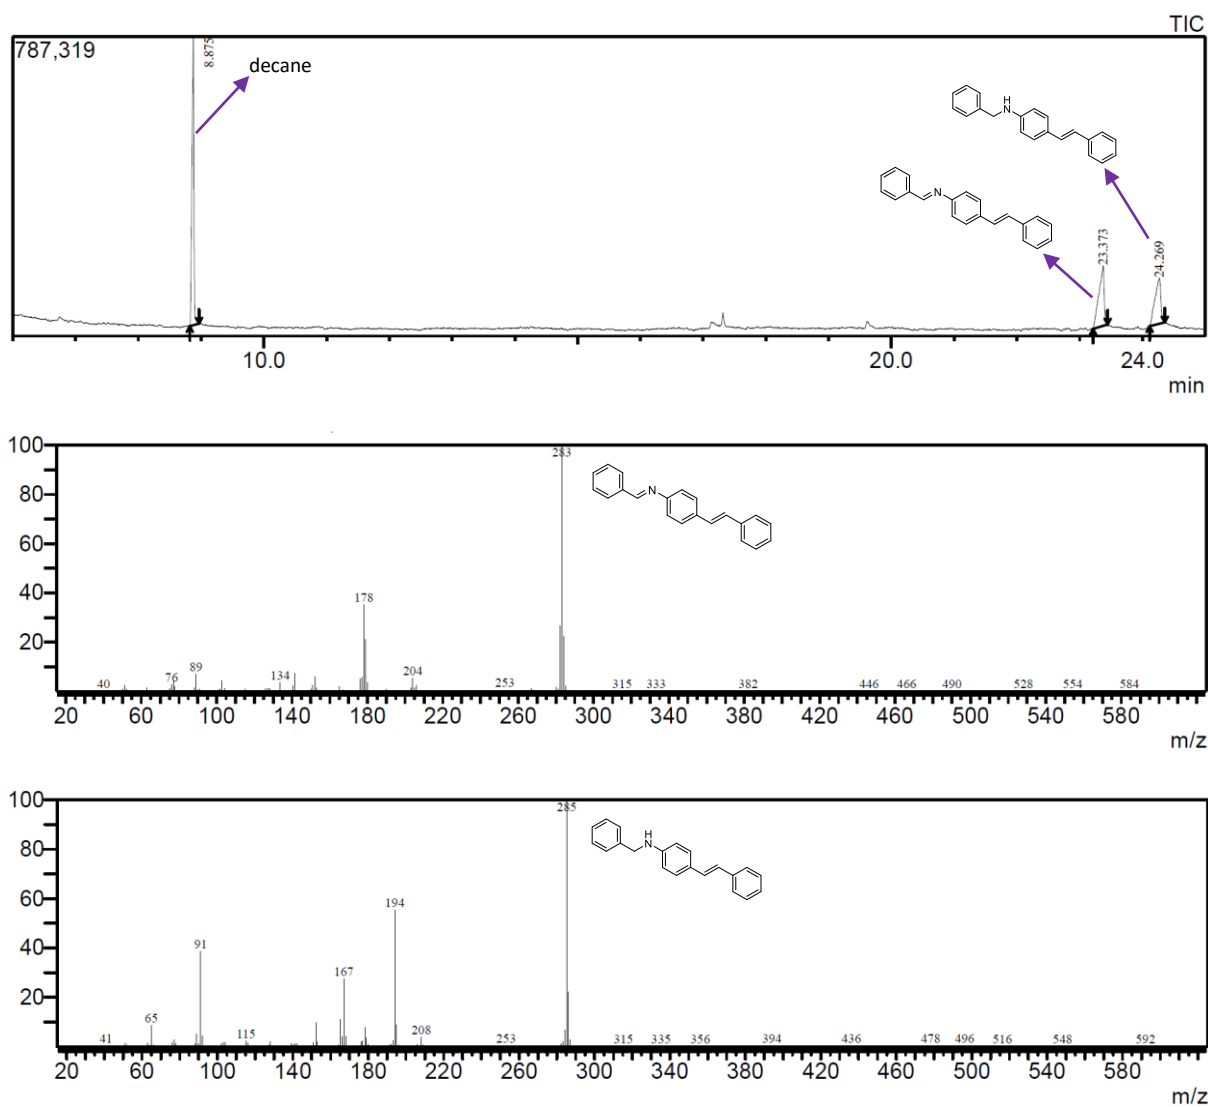

Figure S100. GC-MS spectrum for entry 1 of table 5.

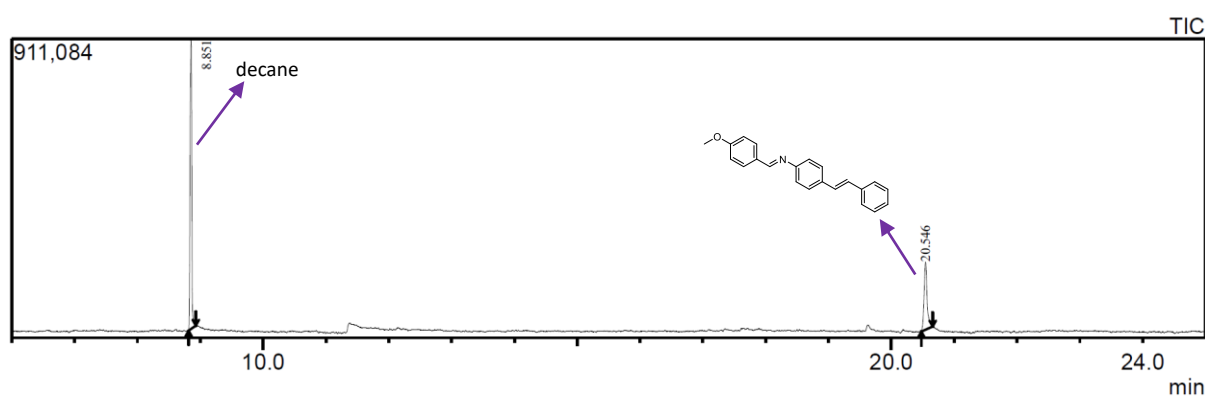



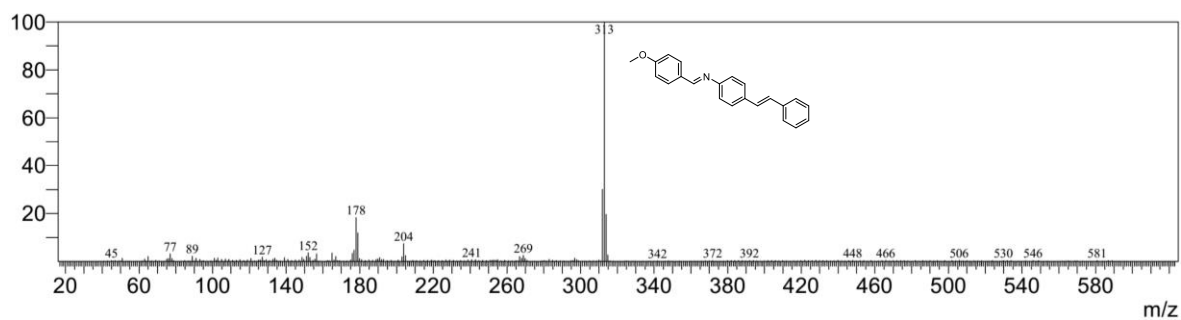

Figure S101. GC-MS spectrum for entry 2 of table 5.

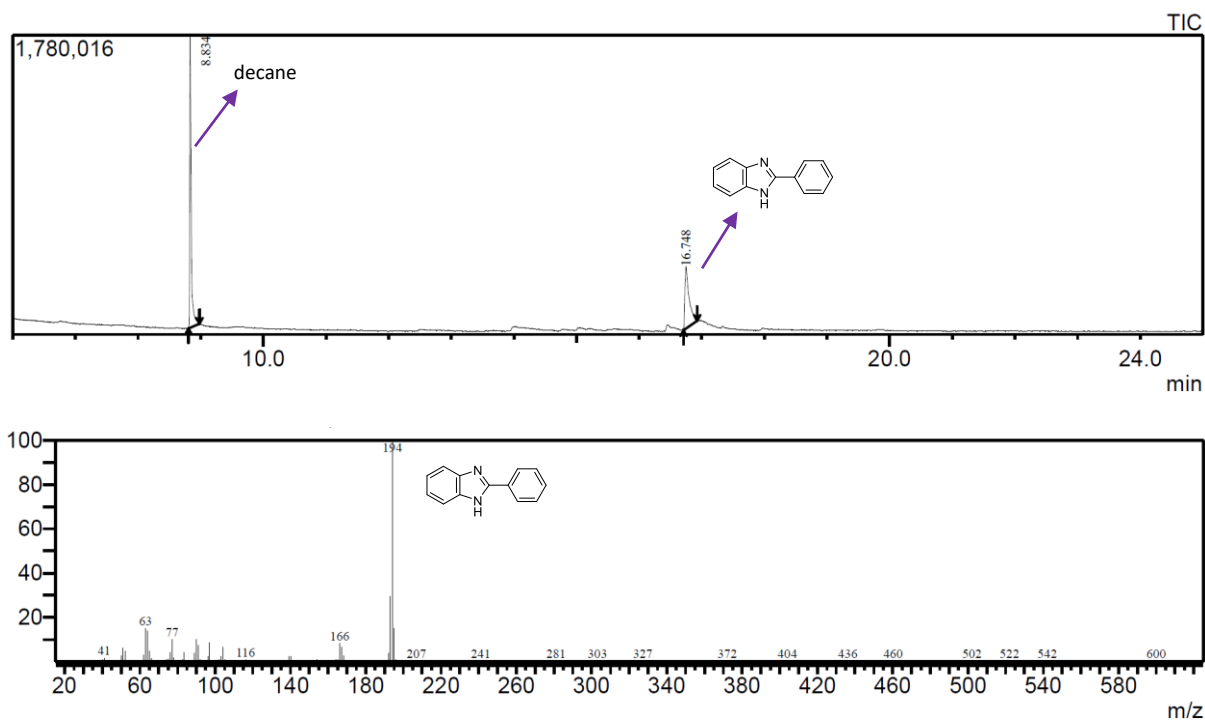

Figure S102. GC-MS spectrum for entry 3 of table 5.

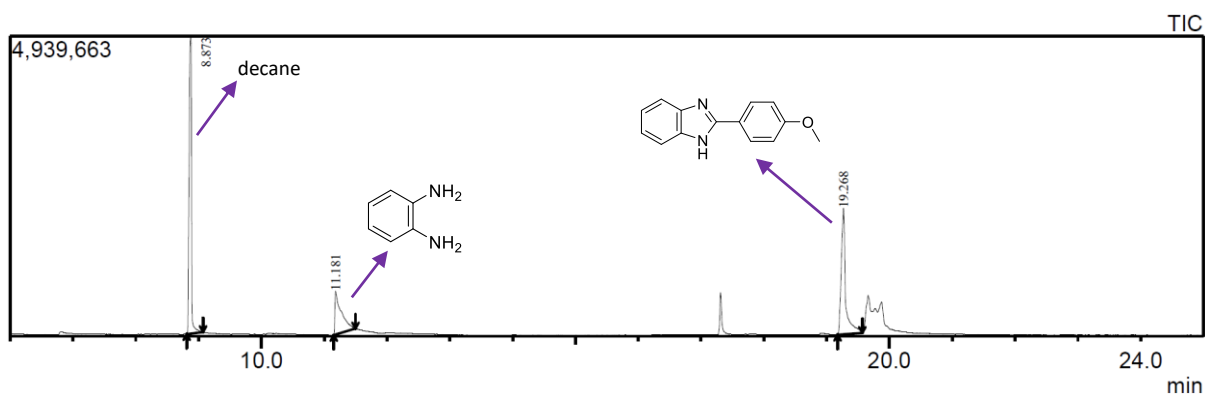

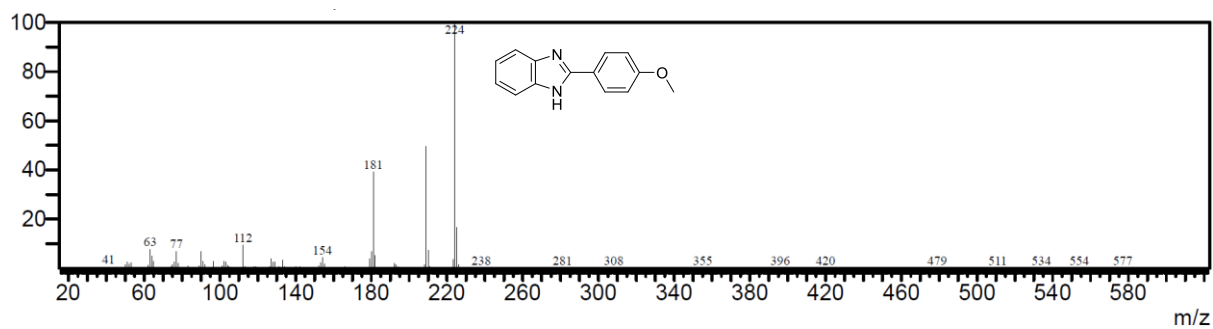

**Figure S103.** GC-MS spectrum for entry 4 of table 5.

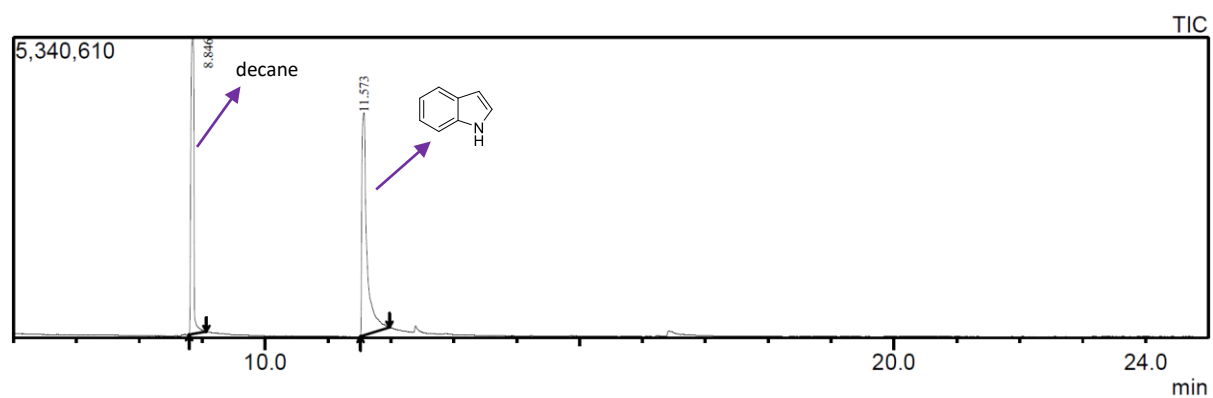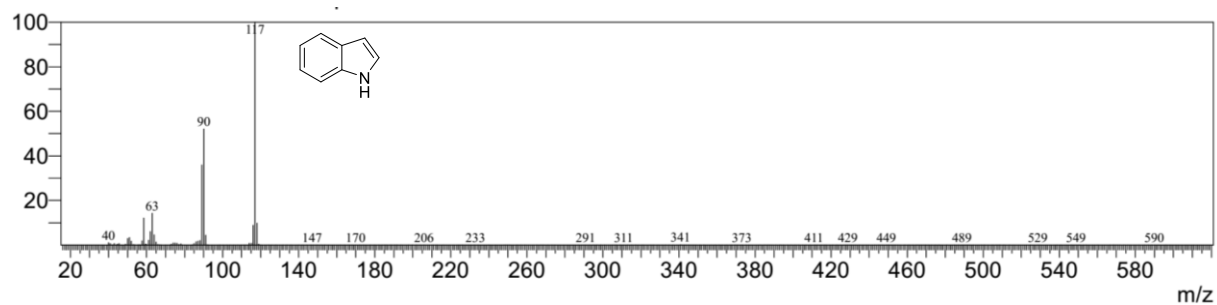

**Figure S104.** GC-MS spectrum for entry 5 of table 5.

### NMR spectra of product after transfer hydrogenation reaction.

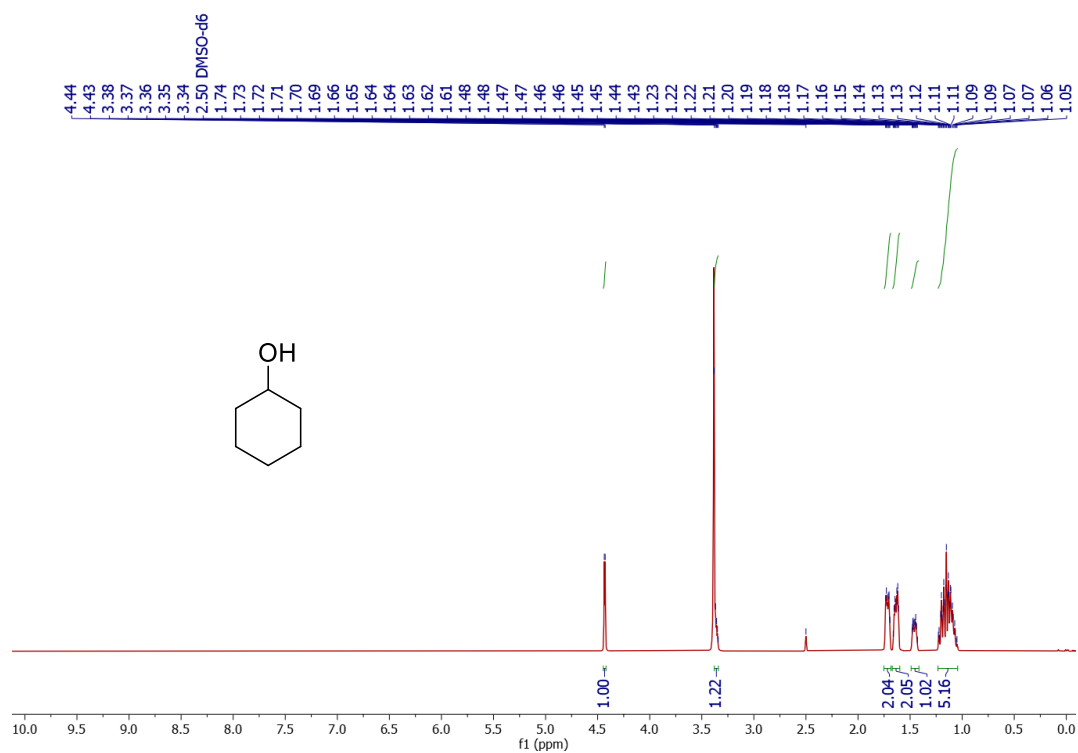

Figure S105.  $^1\text{H}$  NMR spectrum of cyclohexanol.

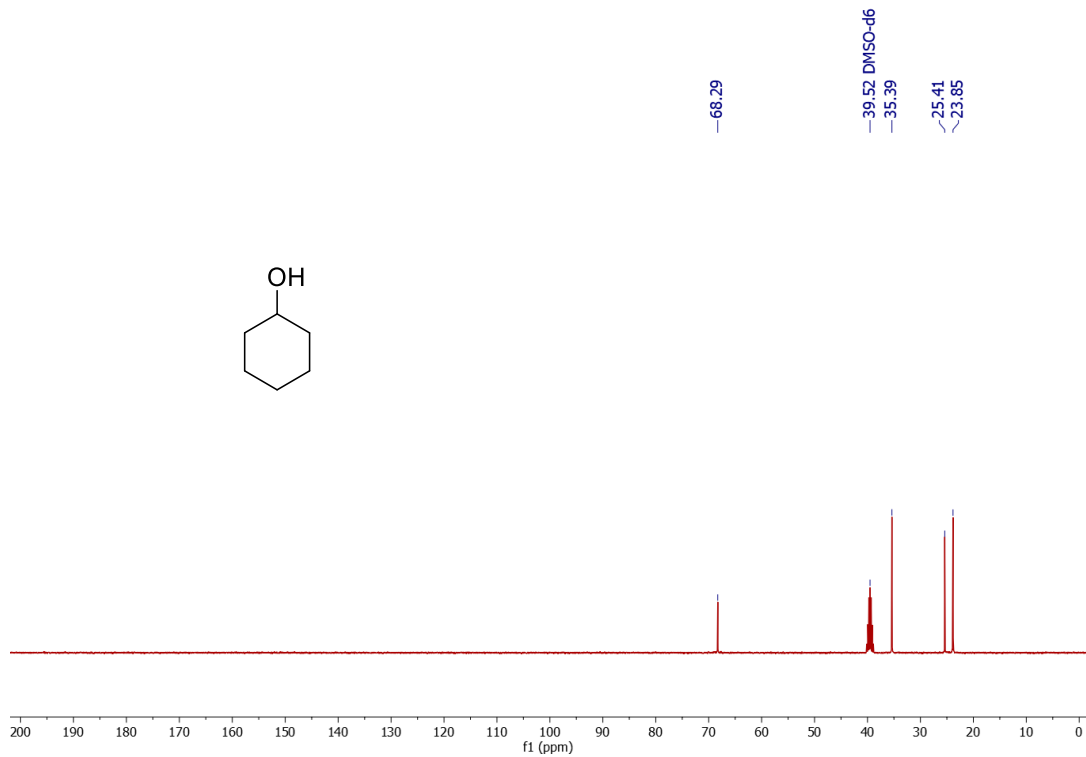

Figure S106.  $^{13}\text{C}$  NMR spectrum of cyclohexanol.

NMR spectra of product after acceptorless alcohol dehydrogenation.

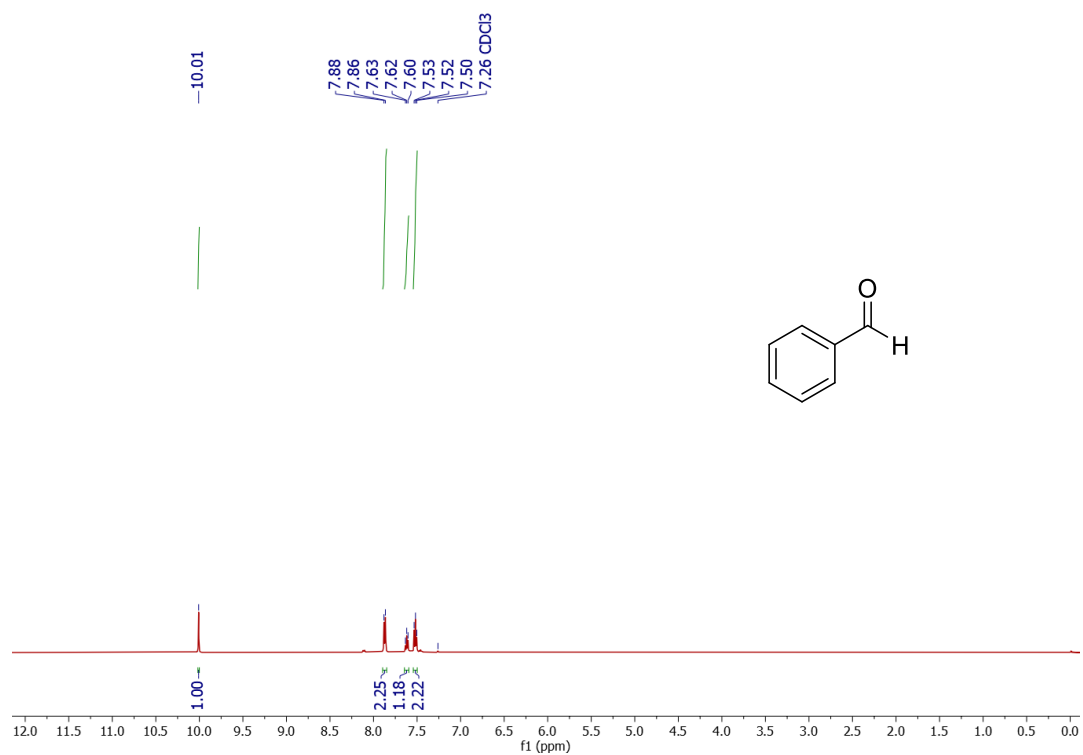

Figure S107.  $^1\text{H}$  NMR spectrum of benzaldehyde.

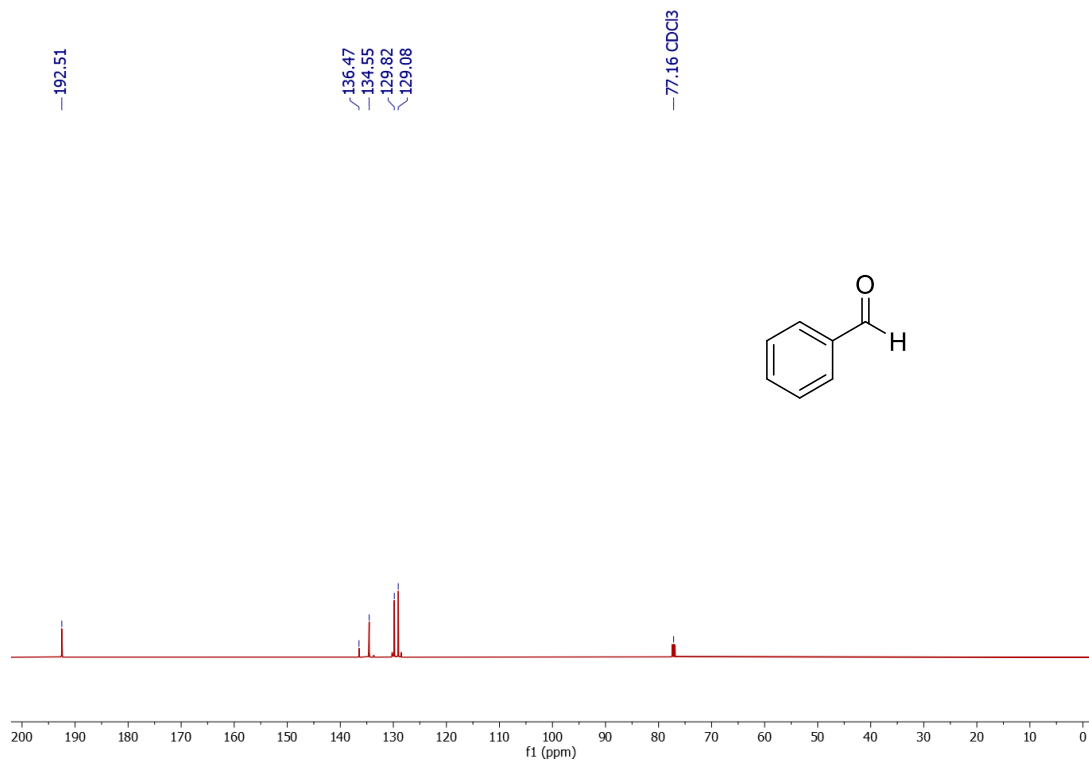

Figure S108.  $^{13}\text{C}$  NMR spectrum of benzaldehyde.

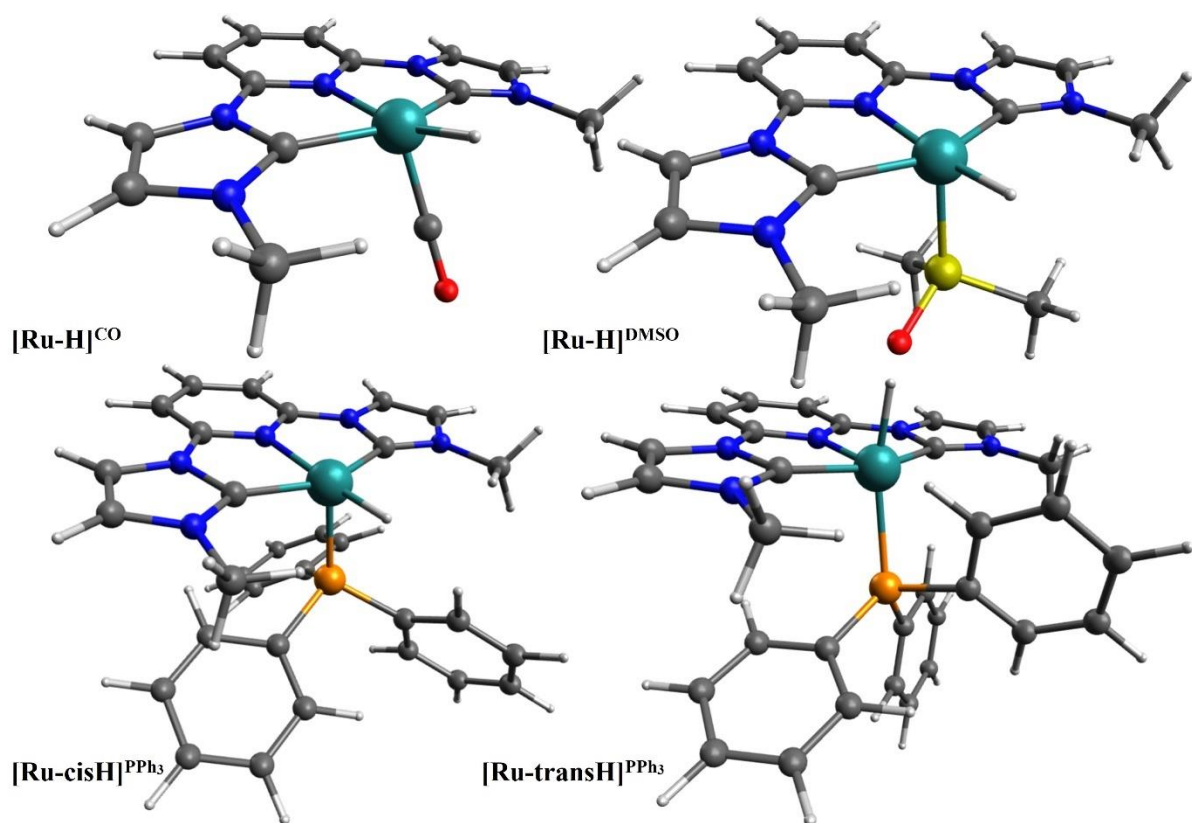

**Figure S109.** DFT optimized structures of  $[\text{Ru-H}]^{\text{L}}$  after aldehyde dissociation from  $\text{B}^{\text{L}}$  ( $\text{L} = \text{CO}$ ,  $\text{DMSO}$  and  $\text{PPh}_3$ ). For  $\text{L} = \text{PPh}_3$ , two structures with hydride position w.r.t.  $\text{PPh}_3$  ligand are calculated. The  $[\text{Ru-transH}]^{\text{PPh}_3}$  (model for  $\mathbf{4b''}$ , confirmed in  $^1\text{H}$  NMR) is found  $-1.7$  kcal/mol lower than  $[\text{Ru-cisH}]^{\text{PPh}_3}$  (model for  $\mathbf{4b'}$ ) possibly due to an agostic interaction between Ru and a phenyl ring of  $\text{PPh}_3$  ligand.

## Cartesian coordinates of DFT optimized structures

### B-CO

|    |                   |                   |                   |
|----|-------------------|-------------------|-------------------|
| Ru | -1.15372206112549 | 0.97723485532526  | 0.00700472651732  |
| H  | -1.78428764605351 | 0.32165240741799  | 1.35010717571905  |
| N  | -0.21217954645072 | 1.84843454058005  | -1.64123392543552 |
| N  | -0.03021446760500 | 3.31188843659006  | 1.96175694434061  |
| N  | 0.56362526489258  | 3.32163371694917  | -0.10756312207798 |
| N  | -2.49509898029893 | -1.28604603735579 | -1.86986927086123 |
| O  | -3.89121220348032 | 2.16189375233839  | 0.15371659196936  |
| N  | -1.12334350955022 | 0.11165802602076  | -2.76893005709475 |
| C  | -0.18578290352311 | 2.60583946222437  | 0.82792899217961  |
| C  | -1.70092811271409 | -0.25016081616334 | -1.55009739532875 |
| C  | -0.27692718489713 | 1.22661727259435  | -2.82029458032239 |
| C  | 0.59673694388663  | 2.89002929456211  | -1.43978248158780 |
| C  | -2.82440389722069 | 1.72886008559574  | 0.07168840573374  |
| C  | 0.78579098379245  | 4.42482186452312  | 1.77022743003579  |
| H  | 1.02515830339403  | 5.10933295050600  | 2.56983741952701  |
| C  | 0.44214143577264  | 1.68437504032524  | -3.91614508176723 |
| H  | 0.39304157759952  | 1.19502207487260  | -4.88133534059150 |
| C  | 1.35626614650844  | 3.42144170078990  | -2.47351955156384 |
| H  | 2.01441970403031  | 4.26902009200090  | -2.32599841204036 |
| C  | -1.56056477190500 | -0.71861476612200 | -3.79502086463825 |
| H  | -1.24481931367083 | -0.61668859486426 | -4.82095273670268 |
| C  | -2.41840896463264 | -1.59437518967307 | -3.22484889646511 |
| H  | -2.98220928152978 | -2.40291810344679 | -3.66494426525815 |
| C  | 1.16105760502979  | 4.43446790636434  | 0.47246429318946  |
| H  | 1.78362743499761  | 5.128277111158688 | -0.06930449307091 |
| C  | 1.25192799393140  | 2.80134270151571  | -3.71741707551693 |
| H  | 1.83113404344705  | 3.18791531060387  | -4.54964464506400 |
| C  | -0.64749217571081 | 2.95478819624116  | 3.23605344685193  |

|   |                   |                   |                   |
|---|-------------------|-------------------|-------------------|
| H | -1.30538710195471 | 3.76205995131466  | 3.57079404872831  |
| H | 0.12521631156922  | 2.77567982559966  | 3.98953570816342  |
| H | -1.23206667100007 | 2.04700487870003  | 3.07924089470719  |
| C | -3.29664276257894 | -2.02182673489568 | -0.89633223871741 |
| H | -2.95065652671720 | -3.05845982386968 | -0.83866647021412 |
| H | -4.35106763889112 | -1.99441549231753 | -1.18591101971391 |
| H | -3.16460449099827 | -1.53798435162578 | 0.07283832695381  |
| O | 0.82568733297474  | -0.04950251184711 | 0.07540292483926  |
| C | 0.27495392674291  | -0.81877002496880 | 0.90758112552435  |
| H | 0.26490317552739  | -0.54717412671205 | 1.97728065856173  |
| C | -0.10798930056635 | -2.19919578301298 | 0.58966975555584  |
| C | -0.71987683974946 | -2.98577266008129 | 1.57140513485848  |
| C | 0.18546385114629  | -2.74933681893820 | -0.66427503489637 |
| C | -1.05314072131629 | -4.30563988443533 | 1.29812261805362  |
| H | -0.93621004155599 | -2.55520997010817 | 2.54662279103895  |
| C | -0.14300368701721 | -4.06936131447295 | -0.93200241320763 |
| H | 0.68593904220513  | -2.13240804402438 | -1.40541450082428 |
| C | -0.76568326506539 | -4.84741238640444 | 0.04663713229069  |
| H | -1.52723273127814 | -4.91697066963036 | 2.05971599820646  |
| H | 0.09846192131609  | -4.50475630713559 | -1.89727417896498 |
| H | -1.01419619970673 | -5.88369104303687 | -0.16345449161990 |

**B-PPh<sub>3</sub>**

|    |                   |                   |                   |
|----|-------------------|-------------------|-------------------|
| Ru | -1.16084743422634 | 0.92809232195030  | -0.03677624538470 |
| H  | -1.98847592726597 | 0.14287679153210  | 1.10970224634811  |
| N  | -0.23512045079430 | 2.11443673310386  | -1.46456402375284 |
| N  | -0.18352304508486 | 2.85750130993059  | 2.35101593401675  |
| N  | 0.40135440851084  | 3.33149383998587  | 0.33049447760864  |
| N  | -2.17414266515597 | -1.14790763499487 | -2.34153335412350 |
| N  | -0.94993589946208 | 0.53121461221387  | -2.90787361074217 |
| C  | -0.33024385134561 | 2.40484708755813  | 1.08810711107207  |

|   |                   |                   |                   |
|---|-------------------|-------------------|-------------------|
| C | -1.53873515490173 | -0.08846042826215 | -1.79272981769814 |
| C | -0.23502822567491 | 1.71900150539039  | -2.73830904382887 |
| C | 0.47213168115913  | 3.17127678717402  | -1.05727361477771 |
| C | 0.58308249371551  | 4.01782087548625  | 2.40223040363039  |
| H | 0.80358303507384  | 4.52383876165026  | 3.32998339824991  |
| C | 0.43235571478147  | 2.44500342177671  | -3.71724029502764 |
| H | 0.43055190614618  | 2.14361479120267  | -4.75752908042255 |
| C | 1.17256187908087  | 3.96036691079615  | -1.96005840224792 |
| H | 1.74405340131964  | 4.82485713551346  | -1.64485743998253 |
| C | -1.23967558426897 | -0.14986675846658 | -4.08191900378698 |
| H | -0.88201845430501 | 0.15408580610390  | -5.05249136281090 |
| C | -2.00621193288469 | -1.20291339020269 | -3.72159520149477 |
| H | -2.43641107496365 | -1.98933093119175 | -4.32325843576940 |
| C | 0.95408573183888  | 4.31887880959168  | 1.13751245559507  |
| H | 1.56173242140530  | 5.12691172960999  | 0.76254728821430  |
| C | 1.12524267126285  | 3.57947619994629  | -3.30043885026306 |
| H | 1.65876510453583  | 4.17213120190827  | -4.03635011944869 |
| C | -0.84139476487069 | 2.25425784958783  | 3.50370098674235  |
| H | -1.55750211240834 | 2.96175625959300  | 3.93512123414786  |
| H | -0.09964087627535 | 1.97085992802610  | 4.25657959544636  |
| H | -1.37495952758519 | 1.36992550211865  | 3.15032053721376  |
| C | -2.96759837113701 | -2.10762878271590 | -1.58254308202837 |
| H | -2.69821227031320 | -3.12399245150993 | -1.88012022355671 |
| H | -4.03570108914832 | -1.93461245351823 | -1.75159680004804 |
| H | -2.73908372190418 | -1.96944563893688 | -0.52612844714418 |
| O | 0.80880780984151  | 0.00359448189133  | 0.02869915607068  |
| C | 0.13857504748563  | -0.69226954596506 | 0.86896750645493  |
| H | 0.18504385424157  | -0.42902270972409 | 1.93956474969849  |
| C | -0.23520655727142 | -2.09465130732550 | 0.57829506431004  |
| C | -0.98263080706862 | -2.82798872733312 | 1.50457155672430  |
| C | 0.21254067442906  | -2.71451602543596 | -0.59165722090703 |



|   |                   |                   |                   |
|---|-------------------|-------------------|-------------------|
| C | -1.30273300457790 | -4.15603737100632 | 1.25350943688148  |
| H | -1.31675287207570 | -2.34699629004185 | 2.42199835156345  |
| C | -0.10024242473602 | -4.04581154407168 | -0.83646457742680 |
| H | 0.81848548186680  | -2.14146604187113 | -1.28766213809399 |
| C | -0.86259061244252 | -4.76792476302346 | 0.08055697397207  |
| H | -1.88290577368717 | -4.72180093735414 | 1.97659338195751  |
| H | 0.26474239878859  | -4.53054042766665 | -1.73786111071784 |
| H | -1.09899385253869 | -5.81082508790994 | -0.10925809883861 |
| P | -3.24336833204961 | 1.89173475122490  | -0.09232043624569 |
| C | -4.71186527660176 | 0.78228946292763  | -0.01622373698848 |
| C | -5.90876162807509 | 1.16075879377014  | -0.63661520835382 |
| C | -4.68494304616104 | -0.38706947615630 | 0.74706719911737  |
| C | -7.04498842949892 | 0.36824639807374  | -0.51462109555915 |
| H | -5.95792038591557 | 2.07840885970187  | -1.21484854697951 |
| C | -5.82559056835958 | -1.17337001908710 | 0.87461160994608  |
| H | -3.76389095511599 | -0.68355153506376 | 1.24089495015080  |
| C | -7.00608791738926 | -0.80146508470752 | 0.23887051806509  |
| H | -7.96517248880762 | 0.67087554391663  | -1.00541805632973 |
| H | -5.78926944080579 | -2.07966000616026 | 1.47218616578186  |
| H | -7.89521752152397 | -1.41773897308506 | 0.33477466238994  |
| C | -3.53863636072601 | 2.81944470491278  | -1.66412656817931 |
| C | -3.56052811160024 | 4.21281276720445  | -1.75327363427287 |
| C | -3.68308728313476 | 2.06903464866513  | -2.83893731008883 |
| C | -3.69009458909918 | 4.83960786087474  | -2.99126981623704 |
| H | -3.50397503231079 | 4.82292265765050  | -0.85899056023425 |
| C | -3.82162625081334 | 2.69583534015228  | -4.07002967548677 |
| H | -3.71982715274601 | 0.98448503958900  | -2.79022816002043 |
| C | -3.81191333646816 | 4.08640513935548  | -4.15240007382188 |
| H | -3.71089646806751 | 5.92428455006830  | -3.04056381634296 |
| H | -3.94948701878095 | 2.09541886806181  | -4.96632848779003 |
| H | -3.92024577907710 | 4.57817253800519  | -5.11451928467433 |

|   |                   |                  |                  |
|---|-------------------|------------------|------------------|
| C | -3.60495556624759 | 3.10743256945322 | 1.24741934118635 |
| C | -4.64058253905851 | 2.89462238209671 | 2.16162910192618 |
| C | -2.79329696115583 | 4.23890662839561 | 1.40333235127961 |
| C | -4.85749734541269 | 3.79147834349647 | 3.20519416503679 |
| H | -5.28386901394648 | 2.02616252073592 | 2.06519323247880 |
| C | -3.02213672386095 | 5.14106947523580 | 2.43471193729863 |
| H | -1.97182829198041 | 4.42455029731958 | 0.71753100468574 |
| C | -4.05369994055943 | 4.91692185371413 | 3.34382260690112 |
| H | -5.66551954517436 | 3.60859362458492 | 3.90721652086444 |
| H | -2.39138013348628 | 6.02067429380775 | 2.52849547831797 |
| H | -4.23119794309813 | 5.61922377615147 | 4.15294137658373 |

#### B-DMSO

|    |                   |                   |                   |
|----|-------------------|-------------------|-------------------|
| Ru | -1.09328429010166 | 0.90013569316317  | -0.05559360730452 |
| H  | -1.84660951810529 | 0.15522462439455  | 1.17642482768125  |
| N  | -0.19010496718541 | 1.89706655379841  | -1.64326185241220 |
| N  | -0.01287116309214 | 3.12012246558527  | 2.04251953922146  |
| N  | 0.60937940001485  | 3.25230404554268  | -0.01562011190719 |
| N  | -2.40260717648785 | -1.28314968286995 | -2.06397191303269 |
| N  | -1.10872337504669 | 0.23848083212691  | -2.87759916706809 |
| C  | -0.13604820335859 | 2.46865920523574  | 0.87451556397142  |
| C  | -1.66254595438160 | -0.22302858055008 | -1.67194344552360 |
| C  | -0.26775338819810 | 1.35786768519571  | -2.86209744025539 |
| C  | 0.63149000549243  | 2.91560852881697  | -1.37282186991542 |
| C  | 0.77337737398441  | 4.26285553755082  | 1.91919000751796  |
| H  | 0.98217389277463  | 4.91150957078214  | 2.75638123323365  |
| C  | 0.43927028711447  | 1.89332361730638  | -3.93146113103246 |
| H  | 0.38008535218338  | 1.47433397604667  | -4.92865391384613 |
| C  | 1.38248647954223  | 3.51570753548587  | -2.37597962111563 |
| H  | 2.05296661907904  | 4.34227201039523  | -2.17416972526078 |
| C  | -1.50389867619664 | -0.55220808706363 | -3.95127481333927 |

|   |                   |                   |                   |
|---|-------------------|-------------------|-------------------|
| H | -1.19106321518169 | -0.37828654090638 | -4.96848483391856 |
| C | -2.31251464071062 | -1.50450101249027 | -3.43555298893401 |
| H | -2.82820686346246 | -2.31753302135661 | -3.92405917207633 |
| C | 1.16837089509713  | 4.35026849056661  | 0.62996708204706  |
| H | 1.78198643492179  | 5.08571691710645  | 0.13492711325113  |
| C | 1.25737716970193  | 2.98933950361000  | -3.66080855013564 |
| H | 1.82979764389282  | 3.43190532286681  | -4.46957811592920 |
| C | -0.68908864062646 | 2.71461993319678  | 3.27125777560908  |
| H | -1.42996251554563 | 3.46927346016602  | 3.54844865761214  |
| H | 0.04256226853458  | 2.58815453694073  | 4.07471327487498  |
| H | -1.20376964530450 | 1.77425451305027  | 3.07053205401732  |
| C | -3.13865334987944 | -2.14066457500193 | -1.14043838513634 |
| H | -2.73949807367335 | -3.15835519617247 | -1.17910277249313 |
| H | -4.20246093482447 | -2.15008576733711 | -1.39905346680142 |
| H | -2.99620357137127 | -1.74184559630763 | -0.13471232188665 |
| O | 0.84345357143215  | -0.06526311219556 | -0.06887576295467 |
| C | 0.24584435967292  | -0.73978047732220 | 0.83654094243520  |
| H | 0.34720402456973  | -0.43456793741681 | 1.89050879179147  |
| C | -0.15707793910682 | -2.14205995822775 | 0.60523544880324  |
| C | -0.81523302394178 | -2.85781999249369 | 1.60939604157768  |
| C | 0.18606884434010  | -2.78175810848028 | -0.59022644484180 |
| C | -1.14563377534587 | -4.19278490819996 | 1.41457335187622  |
| H | -1.07066424618172 | -2.36032795764463 | 2.54262713377818  |
| C | -0.13671500956146 | -4.11925629498959 | -0.77930743036119 |
| H | 0.72477110631248  | -2.22058732971632 | -1.34852167085367 |
| C | -0.80609506403283 | -4.82609533439391 | 0.21976486317067  |
| H | -1.65533094288855 | -4.74652530047617 | 2.19728787270735  |
| H | 0.14896956207769  | -4.62107190376143 | -1.69955868756398 |
| H | -1.04907229648865 | -5.87458334834013 | 0.07385919595196  |
| S | -3.00703283308383 | 2.06577122129299  | 0.08266991996288  |
| O | -3.19003186597798 | 3.00221620546396  | 1.24059479920903  |

|   |                   |                  |                   |
|---|-------------------|------------------|-------------------|
| C | -4.50990364506229 | 1.03286618296410 | 0.00611729918213  |
| H | -4.51536437842913 | 0.46446416497967 | -0.92715353301900 |
| H | -4.47066653771707 | 0.36256639033195 | 0.86664585887735  |
| H | -5.37360620057901 | 1.69998649129559 | 0.07496948081679  |
| C | -3.28154445565648 | 3.05202277476621 | -1.43636567078027 |
| H | -4.24422759684774 | 3.56159678658835 | -1.34275838889803 |
| H | -2.47310346988740 | 3.78564018219707 | -1.48454306417627 |
| H | -3.25680384721627 | 2.39710506490442 | -2.31221825640407 |

**[Ru-H]-CO**

|    |                   |                   |                   |
|----|-------------------|-------------------|-------------------|
| Ru | -1.14736699176474 | 1.03553409201446  | -0.03231129503211 |
| H  | -1.54291812739861 | 0.19706177838587  | 1.26627588914807  |
| N  | -0.09799330486426 | 1.81308257316043  | -1.67833954469648 |
| N  | -0.08689153865029 | 3.43201588137494  | 1.85598773584085  |
| N  | 0.62447188595128  | 3.34450912194121  | -0.17786594958969 |
| N  | -2.48579893716368 | -1.24715891921095 | -1.88286635140905 |
| O  | -3.88662633004641 | 1.92058483177505  | 0.60432288288194  |
| N  | -1.04351958142099 | 0.07968966227051  | -2.78296473850467 |
| C  | -0.17897406238124 | 2.66786816950785  | 0.75076375815303  |
| C  | -1.66208102558282 | -0.23049688628597 | -1.56352935954528 |
| C  | -0.15785183532992 | 1.16354015590689  | -2.84497396384584 |
| C  | 0.70915681126614  | 2.86173693909055  | -1.49044244760447 |
| C  | -2.80829833642036 | 1.57655720773182  | 0.35033841698633  |
| C  | 0.73074737707493  | 4.53867301869642  | 1.65402182835891  |
| H  | 0.92292724521769  | 5.26356359917116  | 2.43066600187157  |
| C  | 0.59388633857738  | 1.57865125092365  | -3.93550210446195 |
| H  | 0.55854896577763  | 1.06671454979608  | -4.88940046456840 |
| C  | 1.49889286518292  | 3.35198965779634  | -2.52135253783310 |
| H  | 2.15777098536523  | 4.20151882590705  | -2.38937852759005 |
| C  | -1.49753660565251 | -0.74891507599206 | -3.80091260390633 |
| H  | -1.15261974303503 | -0.68764670630317 | -4.82079766906480 |

|   |                   |                   |                   |
|---|-------------------|-------------------|-------------------|
| C | -2.40282817401053 | -1.57690747502413 | -3.23144071847922 |
| H | -2.99042325025194 | -2.37017482817353 | -3.66849663891823 |
| C | 1.18197088819102  | 4.48775358602044  | 0.37995355307449  |
| H | 1.83606880078823  | 5.15698917550367  | -0.15596359816511 |
| C | 1.41606811219082  | 2.68970481933518  | -3.74641883429311 |
| H | 2.02061956292614  | 3.04258942281730  | -4.57581815815549 |
| C | -0.77427259104173 | 3.13204122116175  | 3.11080294987793  |
| H | -1.52594761559931 | 3.89971829257126  | 3.31682663438496  |
| H | -0.05042688009754 | 3.09618463996100  | 3.92954928575637  |
| H | -1.25937902868498 | 2.16126995281917  | 3.00139052540796  |
| C | -3.36482981555678 | -1.91268825689032 | -0.92301415895606 |
| H | -3.17609878586933 | -2.98967063353279 | -0.93337683236427 |
| H | -4.41067323874417 | -1.71930708671762 | -1.17909475643963 |
| H | -3.14646403894222 | -1.50712655750956 | 0.06570179168097  |

**[Ru-H]-DMSO**

|    |                   |                   |                   |
|----|-------------------|-------------------|-------------------|
| Ru | -1.16856878913267 | 0.96650455564394  | -0.07798951036173 |
| H  | -1.78466386684143 | 0.13486824347955  | 1.16512581859657  |
| N  | -0.14965458665209 | 1.88462010128446  | -1.64873396016379 |
| N  | -0.00607704445912 | 3.12104648419902  | 2.02659209583923  |
| N  | 0.64705026079382  | 3.24255588300167  | -0.02566047613821 |
| N  | -2.38122756992204 | -1.27577954565843 | -2.08831392438579 |
| N  | -1.12080301811611 | 0.27351669916452  | -2.90389512046488 |
| C  | -0.14080828868743 | 2.47834119423498  | 0.85149186856788  |
| C  | -1.68844175436248 | -0.17842751644364 | -1.69847040089816 |
| C  | -0.25349676539106 | 1.37598974917624  | -2.88203164388028 |
| C  | 0.67516314743613  | 2.90698204673510  | -1.38269180584466 |
| C  | 0.81534854812288  | 4.23683809217471  | 1.91736367014415  |
| H  | 1.03664634873524  | 4.87417194295517  | 2.76014079123524  |
| C  | 0.45076852031168  | 1.91324613613012  | -3.95010397501457 |
| H  | 0.36971062954069  | 1.51343106674444  | -4.95368734908958 |

|                                  |                   |                   |                   |
|----------------------------------|-------------------|-------------------|-------------------|
| C                                | 1.42661021093881  | 3.50664267929356  | -2.38502094310290 |
| H                                | 2.09955731499088  | 4.33092266847441  | -2.18141633611292 |
| C                                | -1.47421857125622 | -0.54346443168602 | -3.96943502992227 |
| H                                | -1.14270583290699 | -0.38145376813831 | -4.98280649244174 |
| C                                | -2.26549575202962 | -1.51155952170298 | -3.45405633367032 |
| H                                | -2.74681715580114 | -2.34688633094680 | -3.94020402084628 |
| C                                | 1.23135922205610  | 4.31790532175544  | 0.63291343669917  |
| H                                | 1.88068155738671  | 5.03226212368015  | 0.15259989054737  |
| C                                | 1.28974433734458  | 2.99364961334188  | -3.67424933334770 |
| H                                | 1.86155048932704  | 3.43738854092520  | -4.48258252582363 |
| C                                | -0.71102110183552 | 2.72811003262671  | 3.24384379049247  |
| H                                | -1.48162179425209 | 3.46813756807396  | 3.47650514693823  |
| H                                | -0.00125060776971 | 2.64508249701366  | 4.07167785213687  |
| H                                | -1.18658319403821 | 1.76541541175703  | 3.05239609164498  |
| C                                | -3.09177161673468 | -2.15132551783506 | -1.16004854920449 |
| H                                | -2.66302576516535 | -3.15722503279625 | -1.19549104777338 |
| H                                | -4.15344866419951 | -2.20310725656024 | -1.42100619223356 |
| H                                | -2.96612457162888 | -1.73738674268070 | -0.15757198728901 |
| S                                | -3.01294350057398 | 2.07606357258756  | 0.08053235571056  |
| O                                | -3.16587532829807 | 3.07163810714702  | 1.18842016891223  |
| C                                | -4.49784019813768 | 1.01185894938667  | 0.13803408418511  |
| H                                | -4.52662818992888 | 0.38310736833128  | -0.75455993374549 |
| H                                | -4.40744034834533 | 0.40309333780736  | 1.03895493620044  |
| H                                | -5.37138792338594 | 1.66746877141608  | 0.19583798849922  |
| C                                | -3.37385047272996 | 2.98398229683706  | -1.46986263949046 |
| H                                | -4.33093867881272 | 3.49935031012426  | -1.35110003645640 |
| H                                | -2.56862030027702 | 3.71089345516856  | -1.60051837796684 |
| H                                | -3.39643933531262 | 2.28222084377662  | -2.30823204068065 |
| <b>[Ru-cisH]-PPh<sub>3</sub></b> |                   |                   |                   |
| Ru                               | -1.20537138174800 | 0.96555659194820  | -0.05851746205130 |

|   |                   |                   |                   |
|---|-------------------|-------------------|-------------------|
| H | -1.85761520345777 | 0.01979993877936  | 1.08299175610463  |
| N | -0.19910529134410 | 2.11895449289084  | -1.45822481086057 |
| N | -0.19539025643657 | 2.85176730699453  | 2.35303275201763  |
| N | 0.41925326443506  | 3.33550936077473  | 0.34082693493847  |
| N | -2.09472352502970 | -1.15164419377222 | -2.34896694927995 |
| N | -0.94579279085088 | 0.57945907283069  | -2.92739290818835 |
| C | -0.33378721543461 | 2.40645542903422  | 1.08230893503633  |
| C | -1.52189477644118 | -0.04779107395238 | -1.80694223157019 |
| C | -0.23073464747486 | 1.76779833239963  | -2.74918739065530 |
| C | 0.49054942204317  | 3.19214599081181  | -1.05018940857977 |
| C | 0.57387430115038  | 4.00513081310325  | 2.42051202454660  |
| H | 0.78750973524642  | 4.50420611344348  | 3.35380489436792  |
| C | 0.40315722950775  | 2.52518880819710  | -3.72442178592422 |
| H | 0.37068766345865  | 2.25404124444862  | -4.77271245570036 |
| C | 1.16098800861397  | 4.00965798725677  | -1.94899627095492 |
| H | 1.71635593675848  | 4.88222699628615  | -1.62655340517378 |
| C | -1.19650847097380 | -0.12724613600314 | -4.09268060647833 |
| H | -0.84241831559385 | 0.17796460212757  | -5.06440027329411 |
| C | -1.91758311294298 | -1.21198185197245 | -3.72599131033069 |
| H | -2.30415477866603 | -2.02360023200948 | -4.32397533225968 |
| C | 0.96581821440374  | 4.31239929025290  | 1.16127941369461  |
| H | 1.58878158513859  | 5.11605811610282  | 0.80187140214380  |
| C | 1.09504355838480  | 3.65791679553268  | -3.29750253546522 |
| H | 1.60341627363201  | 4.27517011902991  | -4.03066665847686 |
| C | -0.87506344752707 | 2.24247872653619  | 3.49093502879113  |
| H | -1.66553627880963 | 2.90951033210253  | 3.85216644014469  |
| H | -0.15805936674881 | 2.04640128500624  | 4.29327832579800  |
| H | -1.31656752265032 | 1.30647174631700  | 3.14368128306411  |
| C | -2.81632014113477 | -2.15004217416436 | -1.56795347636465 |
| H | -2.45207548361796 | -3.15009874968462 | -1.81990559136157 |
| H | -3.89180380992111 | -2.08770958741810 | -1.76428691330758 |

|   |                   |                   |                   |
|---|-------------------|-------------------|-------------------|
| H | -2.62790446001373 | -1.93795003130822 | -0.51486195113636 |
| P | -3.22019948079578 | 1.87937890258875  | -0.09940007252180 |
| C | -4.68552557485567 | 0.76457890290472  | -0.00861447641249 |
| C | -5.88613947204363 | 1.13685051839543  | -0.62613799530953 |
| C | -4.64996439103986 | -0.39966473278209 | 0.76223211901928  |
| C | -7.01963795381348 | 0.34222192573645  | -0.49159616389884 |
| H | -5.94218523474565 | 2.05098304984306  | -1.20904484085170 |
| C | -5.78806395198249 | -1.18787943687912 | 0.90033007840250  |
| H | -3.72315607559563 | -0.67967525600708 | 1.25397541661937  |
| C | -6.97302871073927 | -0.82293265529791 | 0.26829275902164  |
| H | -7.94356808922972 | 0.63955979424041  | -0.97865759907071 |
| H | -5.74768305369362 | -2.08882213320090 | 1.50573694117609  |
| H | -7.86016480033746 | -1.44072289345820 | 0.37285738017086  |
| C | -3.53702399084222 | 2.79673024058141  | -1.67439619087195 |
| C | -3.55852950446710 | 4.18984752710187  | -1.77469343317344 |
| C | -3.69848908404752 | 2.03828473599433  | -2.84208415065891 |
| C | -3.70029417292425 | 4.80735301671934  | -3.01596264605670 |
| H | -3.49520017302479 | 4.80737332761647  | -0.88623541559618 |
| C | -3.84980554261320 | 2.65529640801301  | -4.07626038512945 |
| H | -3.73613856272392 | 0.95401130285889  | -2.78375018466505 |
| C | -3.83666062207136 | 4.04538431508995  | -4.16975069499581 |
| H | -3.72045376302154 | 5.89164088625759  | -3.07349323805680 |
| H | -3.99085364186212 | 2.04855146954936  | -4.96632773181004 |
| H | -3.95484759157557 | 4.52984154816897  | -5.13443815925440 |
| C | -3.56376069216832 | 3.09689731923072  | 1.24207570952238  |
| C | -4.57363425433505 | 2.86547056607866  | 2.18094757015319  |
| C | -2.77558194674445 | 4.24832580008434  | 1.37245981914616  |
| C | -4.79071355090062 | 3.76566289328406  | 3.22135405156798  |
| H | -5.19697655206675 | 1.98072366038396  | 2.10455726499641  |
| C | -3.00452723510429 | 5.15256826531077  | 2.40145675861381  |
| H | -1.96979608925878 | 4.44438891905842  | 0.67125376020996  |



|   |                   |                  |                  |
|---|-------------------|------------------|------------------|
| C | -4.01229724471272 | 4.91169153201666 | 3.33324293068163 |
| H | -5.57858628431506 | 3.56870672114173 | 3.94218241395363 |
| H | -2.39260321470050 | 6.04708682009793 | 2.47658282568635 |
| H | -4.19005441360275 | 5.61657127735569 | 4.14006611615846 |

**[Ru-transH]-PPh<sub>3</sub>**

|    |                   |                   |                   |
|----|-------------------|-------------------|-------------------|
| Ru | -1.45524915492593 | 0.97236337401165  | -0.26622432928134 |
| H  | -0.57726378323009 | -0.30831686140107 | 0.20051820290615  |
| N  | 0.07910095532745  | 1.73855435188245  | -1.22890581922189 |
| N  | -0.65587601765995 | 2.50213924754340  | 2.47933503111611  |
| N  | 0.57469830459636  | 2.74747514353216  | 0.72965605794374  |
| N  | -2.33306178394465 | -0.81062672754307 | -2.83279676888219 |
| N  | -0.64184836664852 | 0.51473402839150  | -2.98660030523334 |
| C  | -0.56404282650027 | 2.08141527567593  | 1.19354913931935  |
| C  | -1.62664855072589 | 0.08222208883218  | -2.09416907631838 |
| C  | 0.30934064213454  | 1.40854219578556  | -2.52174612143912 |
| C  | 0.94616339507988  | 2.55979865360902  | -0.59128218615386 |
| C  | 0.36719943866472  | 3.38647468252472  | 2.80926981940400  |
| H  | 0.45396947977640  | 3.82248420417699  | 3.79294323336253  |
| C  | 1.38501582481425  | 1.91835913434293  | -3.23044976326228 |
| H  | 1.54947094444663  | 1.64400300192146  | -4.26540007571194 |
| C  | 2.04600352272696  | 3.10813850222510  | -1.23120538497997 |
| H  | 2.72749227346302  | 3.76384625573359  | -0.70285665855243 |
| C  | -0.76639749594302 | -0.09758633772623 | -4.22972017055087 |
| H  | -0.10205438664549 | 0.08802259525898  | -5.05778243138894 |
| C  | -1.83076817026844 | -0.92277347072834 | -4.12601620586580 |
| H  | -2.26627699118439 | -1.58744874531064 | -4.85639764696901 |
| C  | 1.14393771684871  | 3.54528640444628  | 1.71687524864227  |
| H  | 2.03282959936948  | 4.13672274916920  | 1.56904220917593  |
| C  | 2.25344889792863  | 2.78134117690345  | -2.56827874980378 |
| H  | 3.10614333191604  | 3.19405770742369  | -3.09591085870550 |

|   |                   |                   |                   |
|---|-------------------|-------------------|-------------------|
| C | -1.71379295994151 | 2.13046125316317  | 3.40852928439378  |
| H | -2.23561262833611 | 3.02826283561783  | 3.75550751677715  |
| H | -1.29621295448298 | 1.58930183523957  | 4.26362693715515  |
| H | -2.42784257225491 | 1.49128873213615  | 2.89017374466214  |
| C | -3.49759427030271 | -1.53541803965286 | -2.33724404060219 |
| H | -3.73712688222675 | -2.34174836071250 | -3.03307524286018 |
| H | -4.35963883960259 | -0.86624939923984 | -2.24589057846860 |
| H | -3.27086279638030 | -1.95711774588240 | -1.35681817812459 |
| P | -3.33383691322061 | 2.44985757914862  | -0.42857181285162 |
| C | -4.38292462181873 | 1.04471296028972  | 0.09849756742100  |
| C | -5.71864019816437 | 0.81152306440388  | -0.21549599875698 |
| C | -3.63209488254405 | 0.03717504495810  | 0.72609603417173  |
| C | -6.31361215083520 | -0.39327917234910 | 0.15972759635221  |
| H | -6.28784479483618 | 1.56384508395548  | -0.75598185479811 |
| C | -4.22140628769370 | -1.16749347321909 | 1.09260552896568  |
| H | -2.58853051542292 | 0.22018306199516  | 1.11700629798005  |
| C | -5.57274724044587 | -1.37309285324541 | 0.81675633061419  |
| H | -7.36215538867619 | -0.56795606109237 | -0.06270340437730 |
| H | -3.63414301743613 | -1.93628380860798 | 1.58618217742015  |
| H | -6.04767228874167 | -2.30414088471345 | 1.11158326294143  |
| C | -4.17749634110776 | 3.14689380479118  | -1.89598656497962 |
| C | -5.09764182990110 | 4.19483431976537  | -1.79219558095533 |
| C | -3.90503476232201 | 2.59052296214034  | -3.14993517420484 |
| C | -5.74747522057156 | 4.66491001866542  | -2.92936248458879 |
| H | -5.30359793509244 | 4.64712972939817  | -0.82616809088079 |
| C | -4.56226664351323 | 3.05951268767059  | -4.28124651252160 |
| H | -3.17132023120067 | 1.79377446003410  | -3.23837854915482 |
| C | -5.48486523303844 | 4.09685705620626  | -4.17229251513123 |
| H | -6.46004568203754 | 5.47971193532354  | -2.84258043195204 |
| H | -4.34565835760866 | 2.62244333086043  | -5.25155245524120 |
| H | -5.99231098587277 | 4.46846984253188  | -5.05751554425683 |

|   |                   |                  |                  |
|---|-------------------|------------------|------------------|
| C | -3.55177814115121 | 3.72167768168896 | 0.87127250847611 |
| C | -4.60538042461468 | 3.68181501671324 | 1.78836987299344 |
| C | -2.59273254596714 | 4.73540143591074 | 0.96979349777921 |
| C | -4.69806073815013 | 4.64559828602478 | 2.78918766285120 |
| H | -5.35271111319016 | 2.89558261649379 | 1.72536762849941 |
| C | -2.69038870680675 | 5.69804868302097 | 1.96715391118019 |
| H | -1.76288153637789 | 4.76709581351692 | 0.26630789007724 |
| C | -3.74176817236826 | 5.65227120527572 | 2.88124979909199 |
| H | -5.52090921753693 | 4.60963425545041 | 3.49710765148053 |
| H | -1.94437990657647 | 6.48460059032056 | 2.03307901832546 |
| H | -3.81628087104649 | 6.40389398532256 | 3.66162690554793 |

#### PhCHO

|   |                   |                   |                   |
|---|-------------------|-------------------|-------------------|
| O | 0.82924960778693  | -0.01443492016350 | 0.22575438720597  |
| C | 0.27121011143719  | -0.80502922555833 | 0.95739729329166  |
| H | -0.00453538068756 | -0.52125517894942 | 2.00055477273707  |
| C | -0.09767706140969 | -2.18287671414738 | 0.57928705269906  |
| C | -0.73770576187357 | -3.00241437694740 | 1.51259737390072  |
| C | 0.18848080601596  | -2.67059404285404 | -0.70095778292654 |
| C | -1.09121827280442 | -4.30261911470120 | 1.17250725028624  |
| H | -0.95594283972068 | -2.61416816098773 | 2.50545513695002  |
| C | -0.16516137843376 | -3.96746949611112 | -1.03770264850654 |
| H | 0.68657605047775  | -2.01381644175231 | -1.40817997648513 |
| C | -0.80459512566333 | -4.78350292172274 | -0.10218773455996 |
| H | -1.58860765706054 | -4.94101132515580 | 1.89648826383868  |
| H | 0.05417313383386  | -4.35144716365108 | -2.02969339562076 |
| H | -1.08014623189816 | -5.79943091729793 | -0.37073999281049 |

## References

1. D. Yadav, S. Misra, D. Kumar, S. Singh and A. K. Singh, *Appl. Organomet. Chem.*, 2021, **35**, e6287.
2. D. Yadav, R. K. Singh, S. Singh, P. M. Shirage and A. K. Singh, *J. Organomet. Chem.*, 2021, **953**, 122061.
3. D. Yadav, R. K. Singh, S. Misra and A. K. Singh, *Appl. Organomet. Chem.*, 2022, e6756.
4. L. M. Dornan and M. J. Muldoon, *Catal. Sci. Technol.*, 2015, **5**, 1428–1432.
